# Supplementary material for: Asymmetric retro-[1,4]-Brook rearrangement of 3-silyl allyloxysilanes via chirality transfer from silicon to carbon
Source: Royal Society of Chemistry journal article supplement (doi:10.1039/c9ra05482k), 2019-01-01

# Asymmetric Retro-[1, 4]-Brook Rearrangement of 3-Silyl Allyloxysilanes via Chirality Transfer from Silicon to Carbon

Ya Wu,<sup>a</sup> Hua Chen,<sup>b</sup> Wenyu Yang,<sup>b</sup> Yu Fan,<sup>b</sup> Lu Gao,<sup>\*b</sup> Zhishan Su,<sup>c</sup> Changwei Hu<sup>c</sup> and Zhenlei Song<sup>\* b</sup>

<sup>a</sup> Department of Biological and Chemical Engineering, Chongqing University of Education, Chongqing 400067, China

<sup>b</sup> Sichuan Engineering Laboratory for Plant-Sourced Drug and Research Center for Drug Industrial Technology, Key Laboratory of Drug-Targeting and Drug Delivery System of the Education Ministry West China School of Pharmacy, Sichuan University Chengdu, 610041 (China) .

<sup>c</sup> Key Laboratory of Green Chemistry & Technology, Ministry of Education, College of Chemistry, Sichuan University Chengdu, 610064 (China)

E-mail: [lugao@scu.edu.cn](mailto:lugao@scu.edu.cn); [zhenleisong@scu.edu.cn](mailto:zhenleisong@scu.edu.cn)

## Table of Contents

|                                                                                        |                |
|----------------------------------------------------------------------------------------|----------------|
| <b>1. General</b>                                                                      |                |
| <b>Methods</b> .....                                                                   | <b>S2</b>      |
| <b>2. Experimental Procedures and Spectral Data of Products</b> .....                  | <b>S2-S19</b>  |
| <b>2.1. General Procedure to Synthesize 3-Silyl Allyloxysilanes 1a-1f</b> .....        | <b>S2-S5</b>   |
| <b>2.2. General Procedure to Synthesize 3-Silyl Allyloxysilanes 1g-1i</b> .....        | <b>S5-S7</b>   |
| <b>2.3. Screening of Silyl Groups</b> .....                                            | <b>S7-S12</b>  |
| <b>2.4. Reactions with electrophiles</b> .....                                         | <b>S12-S17</b> |
| <b>2.5. Preparation of 10 and Its Retro-[1,4]-Brook Rearrangement to Form 11</b> ..... | <b>S18-S21</b> |
| <b>3. HPLC Copies</b> .....                                                            | <b>S21-S24</b> |
| <b>4. Computational Details</b> .....                                                  | <b>S25-S30</b> |
| <b>5. <sup>1</sup>H and <sup>13</sup>C NMR Spectral Copies</b> .....                   | <b>S31-S98</b> |

## 1. General Methods

Reactions were monitored by TLC which was performed on glass-backed silica plates and visualized using UV,  $\text{KMnO}_4$  stains,  $\text{H}_3\text{PO}_4 \cdot 12\text{MoO}_3/\text{EtOH}$  stains,  $\text{H}_2\text{SO}_4(\text{conc.})/\text{anisaldehyde}/\text{EtOH}$  stains. Column chromatography was performed using silica gel (200-300 mesh) eluting with EtOAc/petroleum ether.  $^1\text{H}$  NMR spectra were recorded at 400 MHz (Varian and Bruker) and 600 MHz (Agilent),  $^{13}\text{C}$  NMR spectra were recorded at 100 MHz (Bruker) and 150 MHz (Agilent) using  $\text{CDCl}_3$  (except where noted) with TMS or residual solvent as standard. Infrared spectra were obtained using KCl plates on a VECTOR22. High-resolution mass spectral analyses performed on Waters Q-TOF.  $\text{CCl}_4$ , *n*-hexane, *n*-heptane, HMPA and DMF were distilled from  $\text{CaH}_2$ . DCM, THF and  $\text{Et}_2\text{O}$  were distilled from sodium. All spectral data obtained for new compounds are reported here.

## 2. Experimental Procedures and Spectral Data of Products

### 2.1. General Procedure to Synthesize 3-Silyl Allyloxysilanes 1a-1f

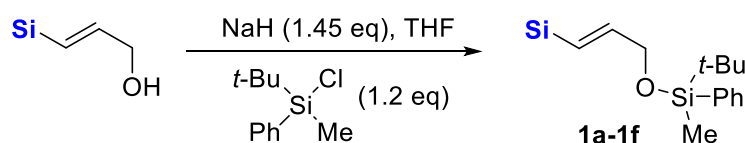

To a suspension of NaH (186 mg, 4.64 mmol) in THF (2.0 mL) under argon atmosphere was added 3-silyl allylic alcohol<sup>1</sup> (3.2 mmol in 6.5 mL THF) slowly at 0 °C. The mixture was stirred for 10 min before adding *t*-BuMePhSiCl (814 mg, 3.84 mmol). After 30 min, the reaction was quenched at 0 °C by careful addition of  $\text{H}_2\text{O}$  followed by neutralization (pH = 7) with aq. 10% HCl. The mixture was extracted with  $\text{Et}_2\text{O}$  (3 × 5 mL). The combined organic layers were dried over  $\text{Na}_2\text{SO}_4$  and concentrated under reduced pressure. Purification of the crude residue via silica gel flash column chromatography (gradient eluent: 1-2% of EtOAc/petroleum ether) afforded **1a-1f**.

### Preparation of 1a

1. Z. -L. Song, Z. Lei, L. Gao, X. Wu, L.- J. Li, *Org. Lett.* **2010**, *12*, 5298-5301.

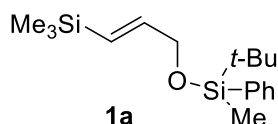

**1a:** 85% yield, a yellow oil;  $^1\text{H}$  NMR (600 MHz,  $\text{CDCl}_3$ )  $\delta$  0.09 (s, 9H), 0.39 (s, 3H), 0.97 (s, 9H), 4.21-4.28 (m, 2H), 6.00 (d, 1H,  $J = 18.6$  Hz), 6.13 (dt, 1H,  $J_1 = 18.6$  Hz,  $J_2 = 4.2$  Hz), 7.37-7.41 (m, 3H), 7.58 (d, 2H,  $J = 6.6$  Hz);  $^{13}\text{C}$  NMR (150 MHz,  $\text{CDCl}_3$ )  $\delta$  -7.1, -1.3, 18.4, 25.9, 65.8, 127.5, 128.2, 129.3, 134.5, 135.8, 144.8; IR (neat)  $\text{cm}^{-1}$  2955, 2934, 2857, 1467, 1251, 1113, 871, 853, 781; HRMS (MALDI,  $m/z$ ) calcd for  $\text{C}_{17}\text{H}_{31}\text{OSi}_2\text{Na}$  ( $\text{M}+\text{Na}$ ) $^+$ : 329.1727, found 329.1736.

### Preparation of 1b

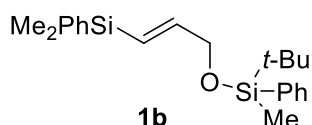

**1b:** 75% yield, a yellow oil;  $^1\text{H}$  NMR (400 MHz,  $\text{CDCl}_3$ )  $\delta$  0.35 (s, 6H), 0.38 (s, 3H), 0.95 (s, 9H), 4.22-4.30 (m, 2H), 6.11-6.23 (m, 2H), 7.36-7.40 (m, 6H), 7.53-7.57 (m, 4H);  $^{13}\text{C}$  NMR (100 MHz,  $\text{CDCl}_3$ )  $\delta$  -7.1, -2.5, 18.4, 25.9, 65.6, 125.8, 127.5, 127.7, 128.9, 129.4, 133.8, 134.5, 135.7, 138.9, 146.8; IR (neat)  $\text{cm}^{-1}$  2956, 2891, 2856, 1466, 1253, 1113, 858, 823, 732; HRMS (MALDI,  $m/z$ ) calcd for  $\text{C}_{22}\text{H}_{32}\text{OSi}_2\text{Na}$  ( $\text{M}+\text{Na}$ ) $^+$ : 391.1884, found 391.1894.

### Preparation of 1c

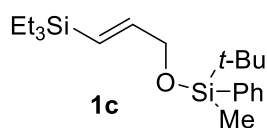

**1c:** 80% yield, a yellow oil;  $^1\text{H}$  NMR (400 MHz,  $\text{CDCl}_3$ )  $\delta$  0.36 (s, 3H), 0.56 (q, 6H,  $J = 8.0$  Hz), 0.91-0.95 (m, 18H), 4.18-4.27 (m, 2H), 5.91 (d, 1H,  $J = 18.8$  Hz), 6.11 (dt, 1H,  $J_1 = 18.8$  Hz,  $J_2 = 3.6$  Hz), 7.33-7.39 (m, 3H), 7.55 (d, 2H,  $J = 6.4$  Hz);  $^{13}\text{C}$  NMR (100 MHz,  $\text{CDCl}_3$ )  $\delta$  -7.1, 4.3, 18.4, 25.9, 65.9, 124.3, 127.4, 129.3, 134.5, 135.9, 146.1; IR (neat)  $\text{cm}^{-1}$  2954, 2878, 2878, 1464, 1113, 827, 783, 732; HRMS (MALDI,  $m/z$ ) calcd for  $\text{C}_{20}\text{H}_{36}\text{OSi}_2\text{Na}$  ( $\text{M}+\text{Na}$ ) $^+$ : 371.2197, found 371.2202.

### Preparation of 1d

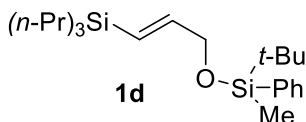

**1d**: 90% yield, a yellow oil;  $^1\text{H}$  NMR (400 MHz,  $\text{CDCl}_3$ )  $\delta$  0.37 (s, 3H), 0.56-0.61 (m, 18H), 0.96 (s, 9H), 0.98 (t, 9H,  $J = 8.0$  Hz), 1.31-1.39 (m, 6H), 4.20-4.28 (m, 2H), 5.94 (d, 1H,  $J = 18.8$  Hz), 6.12 (dt, 1H,  $J_1 = 18.8$  Hz,  $J_2 = 3.6$  Hz), 7.35-7.40 (m, 3H), 7.57 (d, 2H,  $J = 6.8$  Hz);  $^{13}\text{C}$  NMR (150 MHz,  $\text{CDCl}_3$ )  $\delta$  -7.1, 15.4, 17.4, 18.4, 18.5, 25.9, 65.9, 125.5, 127.5, 129.3, 134.5, 135.9, 145.6; IR (neat)  $\text{cm}^{-1}$  2955, 2928, 2862, 1462, 1254, 1113, 1063, 824, 785; HRMS (MALDI,  $m/z$ ) calcd for  $\text{C}_{23}\text{H}_{42}\text{OSi}_2\text{K}$  ( $\text{M}+\text{K}$ ) $^+$ : 429.2406, found 429.2402.

### Preparation of 1e

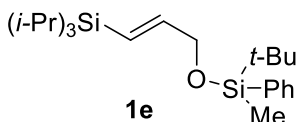

**1e**: 82% yield, a yellow oil;  $^1\text{H}$  NMR (400 MHz,  $\text{CDCl}_3$ )  $\delta$  0.38 (s, 3H), 0.95 (s, 9H), 1.05-1.07 (m, 21H), 4.23-4.31 (m, 2H), 5.93 (d, 1H,  $J = 18.8$  Hz), 6.18 (dt, 1H,  $J_1 = 18.8$  Hz,  $J_2 = 3.6$  Hz), 7.35-7.40 (m, 3H), 7.57 (d, 2H,  $J = 6.8$  Hz);  $^{13}\text{C}$  NMR (150 MHz,  $\text{CDCl}_3$ )  $\delta$  -7.1, 10.9, 18.4, 18.6, 25.9, 65.9, 121.9, 127.5, 129.3, 134.5, 135.9, 144.8; IR (neat)  $\text{cm}^{-1}$  2933, 2893, 2862, 1463, 1254, 1113, 882, 827; HRMS (MALDI,  $m/z$ ) calcd for  $\text{C}_{23}\text{H}_{42}\text{OSi}_2\text{K}$  ( $\text{M}+\text{K}$ ) $^+$ : 429.2406, found 429.2403.

### Preparation of 1f

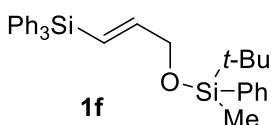

**1f**: 94% yield, white solid, m.p.  $84^\circ\text{C}$ ;  $^1\text{H}$  NMR (400 MHz,  $\text{CDCl}_3$ )  $\delta$  0.39 (s, 3H), 0.97 (s, 9H), 4.29-4.37 (m, 2H), 6.25 (dt, 1H,  $J_1 = 18.4$  Hz,  $J_2 = 3.2$  Hz), 6.64 (d, 1H,  $J = 18.4$  Hz), 7.34-7.45 (m, 12H), 7.54 (d, 6H,  $J = 6.8$  Hz), 7.57 (d, 2H,  $J = 6.8$  Hz);  $^{13}\text{C}$  NMR (150 MHz,  $\text{CDCl}_3$ )  $\delta$  -7.1, 18.4, 25.9, 65.4, 121.4, 127.6, 127.8, 129.4, 129.5, 134.4, 134.7, 135.6, 135.9, 150.8; IR (neat)  $\text{cm}^{-1}$  3065, 3045, 2934, 2834, 2856, 1617, 1465, 1425, 1256, 1183, 1108, 1020, 838, 789; HRMS (MALDI,  $m/z$ ) calcd for  $\text{C}_{32}\text{H}_{36}\text{OSi}_2\text{Na}$  ( $\text{M}+\text{Na}$ ) $^+$ : 515.2197, found 515.2207.

## 2.2. General Procedure to Synthesize 3-Silyl Allyloxysilanes **1g-1i**

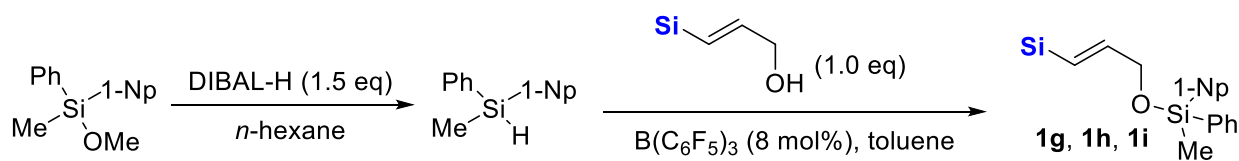

To a solution of 1-NpPhMeSiOMe<sup>2</sup> (834 mg, 3.0 mmol) in anhyd *n*-hexane (15 mL) was added DIBAL-H (4.5 mL, 4.5 mmol, 1M solution in hexane) slowly at 0 °C under argon. The mixture was heated to reflux overnight. The reaction was quenched at 0°C by careful addition of H<sub>2</sub>O followed by neutralization (pH = 7) with aq. 10% HCl. The mixture was extracted with Et<sub>2</sub>O (3 × 5 mL). The combined organic layers were dried over Na<sub>2</sub>SO<sub>4</sub> and concentrated under reduced pressure. Purification of the crude residue via silica gel flash column chromatography (gradient eluent: petroleum ether) afforded 1-NpPhMeSiH (700 mg, 94% yield).

3-silyl allylic alcohol (0.86 mmol), 1-NpPhMeSiH (213 mg, 0.86 mmol) and B(C<sub>6</sub>F<sub>5</sub>)<sub>3</sub> (36 mg, 0.069 mmol) in toluene (1.5 mL) was reacted at 90 °C for 3 h. The reaction mixture was purified by silica gel flash column chromatography (gradient eluent: 1-5% of EtOAc/petroleum ether) to afford **1g, 1h, 1i**.

### Preparation of **1g**

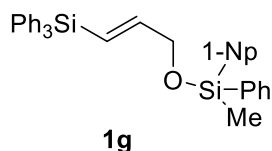

**1g**: 85% yield, white solid, m.p. 131°C; <sup>1</sup>H NMR (400 MHz, CDCl<sub>3</sub>) δ 0.83 (s, 3H), 4.42-4.43 (m, 2H), 6.26 (dt, 1H, *J*<sub>1</sub> = 18.4 Hz, *J*<sub>2</sub> = 3.6 Hz), 6.63 (d, 1H, *J* = 18.4 Hz), 7.34-7.53 (m, 21 H), 7.65 (d, 2H, *J* = 6.8 Hz), 7.82 (d, 1H, *J* = 6.8 Hz), 7.88 (d, 1H, *J* = 8.0 Hz), 7.94 (d, 1H, *J* = 8.0 Hz), 8.22 (d, 1H, *J* = 8.0 Hz); <sup>13</sup>C NMR (100 MHz, CDCl<sub>3</sub>) δ -1.7, 65.9, 122.2, 124.9, 125.5, 126.0, 127.8, 127.9, 128.5, 128.8, 129.4, 129.8, 130.8, 133.3, 133.6, 134.3, 134.5, 135.2, 135.9, 136.3, 136.9, 150.2; IR (neat) cm<sup>-1</sup> 3058, 2962, 2864, 1425, 1257, 1108, 859, 822, 783; HRMS (MALDI, *m/z*) calcd for C<sub>38</sub>H<sub>34</sub>OSi<sub>2</sub>Na (M+Na)<sup>+</sup>: 585.2040, found 585.2040.

### Preparation of **1h**

2. L. H. Sommer, C. L. Frye, G. A. Parker, K. W. Michael, *J. Am. Chem. Soc.* **1964**, *86*, 3271-3276.

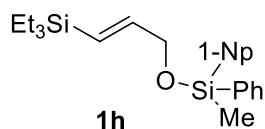

**1h**: 75% yield, a colorless oil;  $^1\text{H}$  NMR (400 MHz,  $\text{CDCl}_3$ )  $\delta$  0.59 (q, 6H,  $J = 8.0$  Hz), 0.85 (s, 3H), 0.96 (t, 9H,  $J = 8.0$  Hz), 4.36-4.38 (m, 2H), 5.95 (d, 1H,  $J = 18.8$  Hz), 6.19 (dt, 1H,  $J_1 = 18.8$  Hz,  $J_2 = 4.0$  Hz), 7.39-7.46 (m, 4H), 7.45-7.53 (m, 2H), 7.68 (d, 2H,  $J = 6.8$  Hz), 7.84 (d, 1H,  $J = 6.8$  Hz), 7.89 (d, 1H,  $J = 8.0$  Hz), 7.96 (d, 1H,  $J = 8.0$  Hz), 8.25 (d, 1H,  $J = 8.0$  Hz);  $^{13}\text{C}$  NMR (100 MHz,  $\text{CDCl}_3$ )  $\delta$  -1.6, 3.4, 7.3, 66.5, 124.9, 125.4, 125.5, 125.9, 127.9, 128.6, 128.7, 129.8, 130.7, 133.3, 133.8, 134.3, 135.2, 136.5, 136.9, 145.5; IR (neat)  $\text{cm}^{-1}$  3051, 2953, 2909, 2875, 1425, 1216, 1113, 1014, 828, 783; HRMS (MALDI,  $m/z$ ) calcd for  $\text{C}_{26}\text{H}_{34}\text{OSi}_2\text{K}$  ( $\text{M}+\text{K}$ ) $^+$ : 457.1780, found 457.1779.

### Preparation of 1i

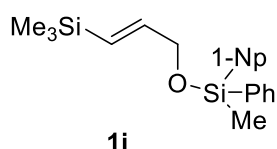

**1i**: 78% yield, a colorless oil;  $^1\text{H}$  NMR (400 MHz,  $\text{CDCl}_3$ )  $\delta$  0.08 (s, 9H), 0.85 (s, 3H), 4.33-4.34 (m, 2H), 5.99 (d, 1H,  $J = 18.4$  Hz), 6.15 (dt, 1H,  $J_1 = 18.8$  Hz,  $J_2 = 4.0$  Hz), 7.37-7.45 (m, 4H), 7.47-7.53 (m, 2H), 7.67 (d, 2H,  $J = 6.8$  Hz), 7.84 (d, 1H,  $J = 6.8$  Hz), 7.89 (d, 1H,  $J = 8.0$  Hz), 7.95 (d, 1H,  $J = 8.0$  Hz), 8.23 (d, 1H,  $J = 8.0$  Hz);  $^{13}\text{C}$  NMR (100 MHz,  $\text{CDCl}_3$ )  $\delta$  -1.7, -1.4, 66.3, 124.9, 125.5, 125.9, 127.9, 128.6, 128.8, 129.3, 129.8, 130.7, 133.3, 133.8, 134.3, 135.2, 136.5, 136.9, 144.2; IR (neat)  $\text{cm}^{-1}$  3050, 2957, 2929, 1590, 1427, 1255, 1118, 1082, 834, 700; HRMS (MALDI,  $m/z$ ) calcd for  $\text{C}_{23}\text{H}_{28}\text{OSi}_2\text{Na}$  ( $\text{M}+\text{Na}$ ) $^+$ : 399.1571, found 399.1575.

### Preparation of 1j

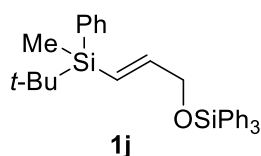

**1j**: Using the same procedure as that used for **1f**: NaH (186mg, 4.64 mmol), THF (2.0 mL), 3-silyl allylic alcohol (3.2mmol in 6.5 mL THF), 0 °C, 10 min; then  $\text{Ph}_3\text{SiCl}$  (1.13g, 3.84 mmol) 0 °C afford **1j**, 82% yield, white solid, m.p. 52°C;  $^1\text{H}$  NMR (400 MHz,  $\text{CDCl}_3$ )  $\delta$  0.39 (s, 3H), 0.95 (s,

9H), 4.50-4.51 (m, 2H), 6.30 (dt, 1H,  $J_1 = 18.8$  Hz,  $J_2 = 3.2$  Hz), 6.40 (d, 1H,  $J = 18.8$  Hz), 7.32 (t, 1H,  $J = 6.8$  Hz), 7.38-7.52 (m, 11H), 7.55 (d, 2H,  $J = 6.8$  Hz), 7.72 (d, 6H,  $J = 6.8$  Hz);  $^{13}\text{C}$  NMR (150 MHz,  $\text{CDCl}_3$ )  $\delta$  -7.8, 17.1, 26.6, 66.5, 123.3, 127.4, 127.7, 127.9, 128.8, 130.0, 129.8, 130.0, 134.1, 134.9, 135.2, 135.3, 135.4, 135.6, 147.3; IR (neat)  $\text{cm}^{-1}$  3065, 2951, 2926, 2852, 1464, 1426, 1364, 1257, 1115, 784, 705; HRMS (MALDI,  $m/z$ ) calcd for  $\text{C}_{32}\text{H}_{36}\text{OSi}_2\text{K}$  ( $\text{M}+\text{K}$ ) $^+$ : 531.1936, found 531.1938.

### 2.3. Screening of Silyl Groups

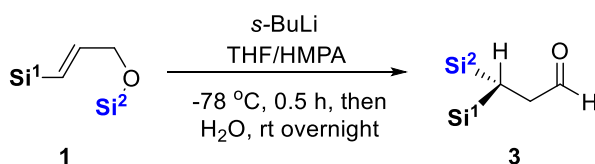

To a solution **1** (0.15 mmol) in anhyd THF (0.5 mL) and anhyd HMPA (0.60 mmol) under argon atmosphere was added *s*-BuLi (0.60 mL of 1.0 M solution in pentane, 0.60 mmol) at -78 °C. After stirring for 30 min, the reaction was quenched with  $\text{H}_2\text{O}$  and was warmed to room temperature with stirring overnight. The combined organic layers were diluted with  $\text{Et}_2\text{O}$  (5.0 mL), dried over  $\text{Na}_2\text{SO}_4$  and concentrated under reduced pressure. Purification of the crude residue via silica gel flash column chromatography (gradient eluent: 1-5% of  $\text{EtOAc}$  /petroleum ether) afforded aldehyde **3**.

#### Preparation of 3a

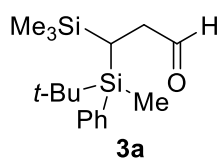

**3a**: 62% yield, a yellow oil; (*dr* = 56:44). **major-isomer**:  $^1\text{H}$  NMR (400 MHz,  $\text{CDCl}_3$ )  $\delta$  -0.28 (s, 9H), 0.37 (s, 3H), 0.89 (s, 9H), 1.29 (dd, 1H,  $J_1 = 7.6$  Hz,  $J_2 = 3.2$  Hz), 2.69 (dd, 1H,  $J_1 = 19.6$  Hz,  $J_2 = 7.6$  Hz), 2.94 (dd, 1H,  $J_1 = 19.6$  Hz,  $J_2 = 3.2$  Hz), 7.32-7.33 (m, 3H), 7.48-7.52 (m, 2H), 9.84 (s, 1H);  $^{13}\text{C}$  NMR (150 MHz,  $\text{CDCl}_3$ )  $\delta$  -7.4, 0.4, 1.0, 18.8, 28.1, 41.3, 127.6, 128.9, 134.6, 137.0, 201.9; **minor-isomer**:  $^1\text{H}$  NMR (400 MHz,  $\text{CDCl}_3$ )  $\delta$  0.01 (s, 9H), 0.36 (s, 3H), 0.95 (s, 9H), 1.19 (dd, 1H,  $J_1 = 7.6$  Hz,  $J_2 = 3.2$  Hz), 2.60 (dd, 1H,  $J_1 = 19.6$  Hz,  $J_2 = 7.6$  Hz), 2.71 (dd, 1H,  $J_1 = 19.6$

Hz,  $J_2 = 3.2$  Hz), 7.32-7.33 (m, 3H), 7.48-7.52 (m, 2H), 9.64 (s, 1H);  $^{13}\text{C}$  NMR (150 MHz,  $\text{CDCl}_3$ )  $\delta$  -5.7, -0.1, 1.7, 18.5, 27.7, 42.6, 127.4, 128.8, 134.7, 137.6, 201.6; IR (neat)  $\text{cm}^{-1}$  3069, 3049, 2958, 2858, 1466, 1423, 1363, 1255, 1107, 1013, 837, 788; HRMS (MALDI,  $m/z$ ) calcd for  $\text{C}_{17}\text{H}_{30}\text{OSi}_2\text{K}$  ( $\text{M}+\text{K}$ ) $^+$ : 345.1467, found 345.1466.

### Preparation of 3b

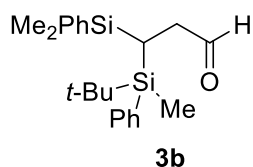

**3b**: 65% yield, a yellow oil; ( $dr = 53:47$ ). **major-isomer**:  $^1\text{H}$  NMR (400 MHz,  $\text{CDCl}_3$ )  $\delta$  0.06 (s, 3H), 0.23 (s, 3H), 0.31 (s, 3H), 0.87 (s, 9H), 1.56 (dd, 1H,  $J_1 = 7.2$  Hz,  $J_2 = 3.2$  Hz), 2.59-2.74 (m, 1H), 2.83 (dd, 1H,  $J_1 = 19.6$  Hz,  $J_2 = 3.2$  Hz), 7.24-7.32 (m, 7H), 7.43-7.49 (m, 3H), 9.39 (s, 1H);  $^{13}\text{C}$  NMR (100 MHz,  $\text{CDCl}_3$ )  $\delta$  -5.5, -1.5, -1.0, 1.0, 18.9, 27.9, 41.4, 127.5, 127.7, 128.8, 129.0, 133.9, 134.7, 136.9, 139.1, 201.0; **minor-isomer**:  $^1\text{H}$  NMR (400 MHz,  $\text{CDCl}_3$ )  $\delta$  -0.12 (s, 3H), 0.18 (s, 3H), 0.31 (s, 3H), 0.86 (s, 9H), 1.49 (dd, 1H,  $J_1 = 7.2$  Hz,  $J_2 = 3.2$  Hz), 2.59-2.74 (m, 2H), 7.24-7.32 (m, 7H), 7.43-7.49 (m, 3H), 9.52 (s, 1H);  $^{13}\text{C}$  NMR (100 MHz,  $\text{CDCl}_3$ )  $\delta$  -7.7, -2.2, -1.2, 0.5, 18.6, 27.7, 42.5, 127.4, 127.6, 128.8, 128.9, 133.8, 134.8, 137.0, 139.0, 201.4; IR (neat)  $\text{cm}^{-1}$  2958, 2932, 1719, 1424, 1363, 1108, 1013, 820, 791; HRMS (MALDI,  $m/z$ ) calcd for  $\text{C}_{22}\text{H}_{32}\text{OSi}_2\text{K}$  ( $\text{M}+\text{K}$ ) $^+$ : 407.1623, found 407.1815.

### Preparation of 3c

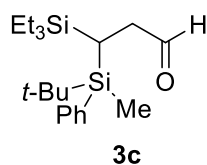

**3c**: 53% yield, a yellow oil; ( $dr = 67:33$ ). **major-isomer**:  $^1\text{H}$  NMR (400 MHz,  $\text{CDCl}_3$ )  $\delta$  0.17-0.29 (m, 6H), 0.39 (s, 3H), 0.78 (t, 9H,  $J = 8.0$  Hz), 0.88 (s, 9H), 1.43 (dd, 1H,  $J_1 = 7.2$  Hz,  $J_2 = 3.6$  Hz), 2.71 (dd, 1H,  $J_1 = 20.0$  Hz,  $J_2 = 7.2$  Hz), 2.92 (dd, 1H,  $J_1 = 20.0$  Hz,  $J_2 = 3.6$  Hz), 7.29-7.35 (m, 3H), 7.53 (d, 2H,  $J = 7.2$  Hz), 9.83 (s, 1H);  $^{13}\text{C}$  NMR (150 MHz,  $\text{CDCl}_3$ )  $\delta$  -7.1, -2.1, 3.9, 7.6, 19.0, 28.1, 41.3, 127.4, 128.9, 134.5, 137.6, 201.8; **minor-isomer**:  $^1\text{H}$  NMR (400 MHz,  $\text{CDCl}_3$ )  $\delta$  0.39 (s, 3H),



0.52 (ddd, 6H,  $J_1 = 15.2$  Hz,  $J_2 = 7.6$  Hz,  $J_3 = 3.6$  Hz), 0.85-0.89 (m, 9H), 0.96 (s, 9H), 1.31 (dd, 1H,  $J_1 = 7.6$  Hz,  $J_2 = 3.6$  Hz), 2.63 (dd, 1H,  $J_1 = 20.0$  Hz,  $J_2 = 7.6$  Hz), 2.77 (dd, 1H,  $J_1 = 20.0$  Hz,  $J_2 = 3.6$  Hz), 7.29-7.35 (m, 3H), 7.53 (d, 2H,  $J = 7.2$  Hz), 9.64 (s, 1H);  $^{13}\text{C}$  NMR (150 MHz,  $\text{CDCl}_3$ )  $\delta$  -5.2, -2.8, 4.3, 7.6, 18.9, 27.9, 42.4, 127.5, 128.9, 134.8, 137.1, 201.6; IR (neat)  $\text{cm}^{-1}$  2955, 2933, 2879, 1703, 1465, 1422, 1007, 786, 733; HRMS (MALDI,  $m/z$ ) calcd for  $\text{C}_{20}\text{H}_{36}\text{OSi}_2\text{Na}$  ( $\text{M}+\text{Na}$ ) $^+$ : 371.2197, found 371.2195.

### Preparation of 3d

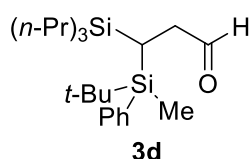

**3d**: 50% yield, a yellow oil; ( $dr = 65:35$ ). **major-isomer**:  $^1\text{H}$  NMR (400 MHz,  $\text{CDCl}_3$ )  $\delta$  0.11-0.26 (m, 6H), 0.38 (s, 3H), 0.79 (t, 9H,  $J = 7.2$  Hz), 0.88 (s, 9H), 1.11-1.16 (m, 6H), 1.38 (dd, 1H,  $J_1 = 6.4$  Hz,  $J_2 = 3.6$  Hz), 2.69 (dd, 1H,  $J_1 = 20.0$  Hz,  $J_2 = 6.4$  Hz), 2.90 (dd, 1H,  $J_1 = 20.0$  Hz,  $J_2 = 3.6$  Hz), 7.30-7.32 (m, 3H), 7.52 (d, 2H,  $J = 7.2$  Hz), 9.82 (s, 1H);  $^{13}\text{C}$  NMR (150 MHz,  $\text{CDCl}_3$ )  $\delta$  -7.1, -1.6, 15.9, 17.5, 18.5, 19.1, 28.1, 41.3, 127.4, 128.9, 134.6, 137.6, 201.8; **minor-isomer**:  $^1\text{H}$  NMR (400 MHz,  $\text{CDCl}_3$ )  $\delta$  0.38 (s, 3H), 0.44-0.48 (m, 6H), 0.87 (t, 9H,  $J = 7.2$  Hz), 0.95 (s, 9H), 1.18-1.28 (m, 7H), 2.62 (dd, 1H,  $J_1 = 20.0$  Hz,  $J_2 = 7.6$  Hz), 2.79 (dd, 1H,  $J_1 = 20.0$  Hz,  $J_2 = 3.2$  Hz), 7.30-7.32 (m, 3H), 7.52 (d, 2H,  $J = 7.2$  Hz), 9.65 (s, 1H);  $^{13}\text{C}$  NMR (150 MHz,  $\text{CDCl}_3$ )  $\delta$  -5.2, -2.2, 16.3, 17.6, 18.6, 18.9, 27.9, 42.5, 127.5, 128.8, 134.8, 137.1, 201.6; IR (neat)  $\text{cm}^{-1}$  2956, 2895, 2865, 1708, 1422, 1217, 1106, 1064, 760, 736; HRMS (MALDI,  $m/z$ ) calcd for  $\text{C}_{23}\text{H}_{42}\text{OSi}_2\text{Na}$  ( $\text{M}+\text{Na}$ ) $^+$ : 413.2666, found 413.2675.

### Preparation of 3e

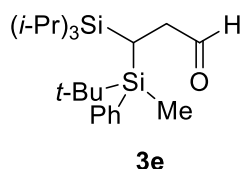

**3f**: 45% yield, a yellow oil; ( $dr = 83:17$ ). **major-isomer**:  $^1\text{H}$  NMR (400 MHz,  $\text{CDCl}_3$ )  $\delta$  0.48 (s, 3H), 0.71-0.79 (m, 3H), 0.89 (s, 9H), 0.90 (d, 9H,  $J = 7.6$  Hz), 0.96 (d, 9H,  $J = 7.6$  Hz), 1.74 (dd, 1H,  $J_1$

= 4.4 Hz,  $J_2 = 4.4$  Hz), 2.88 (dd, 1H,  $J_1 = 20.8$  Hz,  $J_2 = 4.4$  Hz), 3.01 (dd, 1H,  $J_1 = 20.8$  Hz,  $J_2 = 4.4$  Hz), 7.26-7.35 (m, 3H), 7.60 (d, 2H,  $J = 6.8$  Hz), 9.86 (s, 1H);  $^{13}\text{C}$  NMR (150 MHz,  $\text{CDCl}_3$ )  $\delta$  -6.6, -4.1, 12.5, 19.2, 19.5, 19.6, 28.2, 42.1, 127.1, 128.9, 135.1, 137.4, 201.9; **minor-isomer**:  $^1\text{H}$  NMR (400 MHz,  $\text{CDCl}_3$ )  $\delta$  0.47 (s, 3H), 0.71-0.79 (m, 3H), 0.89 (s, 9H), 0.90 (d, 9H,  $J = 7.6$  Hz), 0.96 (d, 9H,  $J = 7.6$  Hz), 1.74 (dd, 1H,  $J_1 = 4.4$  Hz,  $J_2 = 4.4$  Hz), 3.01 (dd, 1H,  $J_1 = 20.8$  Hz,  $J_2 = 4.4$  Hz), 3.12 (dd, 1H,  $J_1 = 20.8$  Hz,  $J_2 = 4.4$  Hz), 7.26-7.35 (m, 3H), 7.60 (d, 2H,  $J = 6.8$  Hz), 9.76 (s, 1H);  $^{13}\text{C}$  NMR (150 MHz,  $\text{CDCl}_3$ )  $\delta$  -6.6, -3.9, 13.2, 19.2, 19.5, 19.6, 28.1, 42.1, 127.1, 128.9, 135.1, 137.4, 201.9; IR (neat)  $\text{cm}^{-1}$  2934, 2863, 1706, 1464, 1420, 1235, 1008, 822, 781; HRMS (MALDI,  $m/z$ ) calcd for  $\text{C}_{23}\text{H}_{42}\text{OSi}_2\text{Na}$  ( $\text{M}+\text{Na}$ ) $^+$ : 413.2666, found 413.2672.

### Preparation of 3f

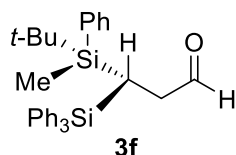

**3f**: 60% yield, white solid, m.p. 94°C; (*dr* = 90:10).  $^1\text{H}$  NMR (400 MHz,  $\text{CDCl}_3$ )  $\delta$  0.10 (s, 3H), 0.85 (s, 9H), 2.53 (t, 1H,  $J = 4.4$  Hz) (major), **2.27 (t, 1H,  $J = 4.4$  Hz) (minor)**, 3.05 (dd, 1H,  $J_1 = 20.0$  Hz,  $J_2 = 4.4$  Hz), 3.16 (dd, 1H,  $J_1 = 20.0$  Hz,  $J_2 = 4.4$  Hz), 6.96 (t, 2H,  $J = 7.2$  Hz), 7.13 (t, 3H,  $J = 7.2$  Hz), 7.20-7.26 (m, 6H), 7.31 (t, 3H,  $J = 7.2$  Hz), 7.40 (d, 6H,  $J = 7.2$  Hz), 9.58 (s, 1H) (major), **9.32 (s, 1H) (minor)**;  $^{13}\text{C}$  NMR (100 MHz,  $\text{CDCl}_3$ )  $\delta$  -7.1, -2.1, 19.2, 27.7, 42.6, 126.8, 127.5, 128.4, 129.1, 134.6, 134.9, 135.9, 200.8; IR (neat)  $\text{cm}^{-1}$  3068, 3049, 2959, 2931, 2857, 1717, 1685, 1467, 1426, 1285, 1162, 1106, 1019, 789; HRMS (MALDI,  $m/z$ ) calcd for  $\text{C}_{32}\text{H}_{36}\text{OSi}_2\text{Na}^+$ : 515.2197, found 515.2199.

### Preparation of 3g

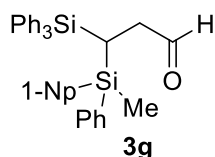

**3g**: 65% yield, white solid, m.p. 80°C; (*dr* = 65:35). **major-isomer**:  $^1\text{H}$  NMR (400 MHz,  $\text{CDCl}_3$ )  $\delta$  0.54 (s, 3H), 2.80-2.88 (m, 2H), 2.96-2.98 (m, 1H), 7.19-7.36 (m, 11H), 7.41 (t, 4H,  $J = 7.2$  Hz), 7.50 (d, 4H,  $J = 7.2$  Hz), 7.55-7.59 (m, 3H), 7.73 (d, 1H,  $J = 7.2$  Hz), 7.79-7.82 (m, 3H), 7.95 (d,

1H,  $J = 7.2$  Hz), 9.24 (s, 1H);  $^{13}\text{C}$  NMR (150 MHz,  $\text{CDCl}_3$ )  $\delta$  -0.6, 1.0, 42.4, 124.9, 125.1, 125.5, 127.7, 127.8, 128.7, 128.9, 129.1, 129.4, 130.3, 133.5, 133.8, 134.5, 135.0, 135.4, 136.0, 136.6, 137.1, 200.5; **minor-isomer**:  $^1\text{H}$  NMR (400 MHz,  $\text{CDCl}_3$ )  $\delta$  0.52 (s, 3H), 2.80-2.88 (m, 2H), 2.96-2.98 (m, 1H), 7.19-7.36 (m, 11H), 7.41 (t, 4H,  $J = 7.2$  Hz), 7.50 (d, 4H,  $J = 7.2$  Hz), 7.55-7.59 (m, 3H), 7.73 (d, 1H,  $J = 7.2$  Hz), 7.79-7.82 (m, 3H), 7.95 (d, 1H,  $J = 7.2$  Hz), 9.09 (s, 1H);  $^{13}\text{C}$  NMR (150 MHz,  $\text{CDCl}_3$ )  $\delta$  -0.6, 1.0, 42.8, 125.1, 125.2, 125.7, 127.7, 127.9, 128.5, 129.0, 129.2, 129.5, 130.2, 133.5, 133.8, 134.7, 135.2, 135.5, 135.9, 136.6, 137.1, 200.9; IR (neat)  $\text{cm}^{-1}$  3064, 2963, 2917, 1713, 1423, 1401, 1102, 1023, 801, 700; HRMS (MALDI,  $m/z$ ) calcd for  $\text{C}_{38}\text{H}_{34}\text{OSi}_2\text{Na}$  ( $\text{M}+\text{Na}$ ) $^+$ : 585.2040, found 585.2042.

### Preparation of 3h

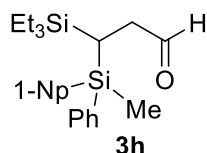

**3h**: 73% yield, a colorless oil; ( $dr = 83:17$ ). **major-isomer**:  $^1\text{H}$  NMR (400 MHz,  $\text{CDCl}_3$ )  $\delta$  0.24-0.42 (m, 6H), 0.77 (t, 9H,  $J = 8.0$  Hz), 0.82 (s, 9H), 1.91 (dd, 1H,  $J_1 = 5.2$  Hz,  $J_2 = 5.2$  Hz), 2.75-2.88 (m, 2H), 7.31-7.48 (m, 6H), 7.54-7.56 (m, 2H), 7.73-7.84 (m, 2H), 7.88 (d, 1H,  $J = 8.0$  Hz), 8.04 (d, 1H,  $J = 8.0$  Hz), 9.66 (s, 1H);  $^{13}\text{C}$  NMR (150 MHz,  $\text{CDCl}_3$ )  $\delta$  -1.8, 0.00, 3.9, 7.5, 41.6, 124.9, 125.4, 125.7, 127.9, 128.5, 128.9, 129.1, 130.5, 133.5, 134.6, 134.9, 135.1, 137.0, 137.6, 201.40; **minor-isomer**:  $^1\text{H}$  NMR (400 MHz,  $\text{CDCl}_3$ )  $\delta$  0.24-0.42 (m, 6H), 0.67 (t, 9H,  $J = 8.0$  Hz), 0.85 (s, 9H), 1.76 (dd, 1H,  $J_1 = 5.2$  Hz,  $J_2 = 5.2$  Hz), 2.75-2.88 (m, 2H), 7.31-7.48 (m, 6H), 7.54-7.56 (m, 2H), 7.73-7.84 (m, 2H), 7.88 (d, 1H,  $J = 8.0$  Hz), 8.04 (d, 1H,  $J = 8.0$  Hz), 9.57 (s, 1H);  $^{13}\text{C}$  NMR (150 MHz,  $\text{CDCl}_3$ )  $\delta$  -1.7, 0.09, 4.1, 7.7, 41.9, 125.0, 125.4, 125.6, 127.8, 128.6, 129.0, 129.2, 130.5, 133.5, 134.6, 134.9, 135.1, 137.0, 137.6, 201.45; IR (neat)  $\text{cm}^{-1}$  3050, 2955, 2910, 1718, 1461, 1422, 1382, 1105, 1011, 795, 708; HRMS (MALDI,  $m/z$ ) calcd for  $\text{C}_{26}\text{H}_{34}\text{OSi}_2\text{Na}$  ( $\text{M}+\text{Na}$ ) $^+$ : 441.2040, found 441.2035.

### Preparation of 3i

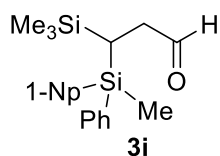

**3i**: 63% yield, a colorless oil; (*dr* = 86:14). **major-isomer**:  $^1\text{H}$  NMR (400 MHz,  $\text{CDCl}_3$ )  $\delta$  -0.24 (s, 9H), 0.79 (s, 3H), 1.78 (dd, 1H,  $J_1 = 7.6$  Hz,  $J_2 = 3.6$  Hz), 2.73-2.87 (m, 2H), 7.32-7.48 (m, 6H), 7.55 (d, 2H,  $J = 6.8$  Hz), 7.77(d, 1H,  $J = 6.8$  Hz), 7.82-7.89 (m, 2H), 8.01(d, 1H,  $J = 8.0$  Hz), 9.72 (s, 1H);  $^{13}\text{C}$  NMR (150 MHz,  $\text{CDCl}_3$ )  $\delta$  -2.1, -0.4, 3.4, 41.6, 124.9, 125.4, 125.8, 127.9, 128.4, 128.9, 129.1, 130.5, 133.4, 134.5, 134.8, 134.9, 137.1, 137.4, 201.5; **minor-isomer**:  $^1\text{H}$  NMR (400 MHz,  $\text{CDCl}_3$ ) -0.14 (s, 9H), 0.79 (s, 3H), 1.61-1.64 (m, 1H), 2.73-2.87 (m, 2H), 7.32-7.48 (m, 6H), 7.55 (d, 2H,  $J = 6.8$  Hz), 7.77 (d, 1H,  $J = 6.8$  Hz), 7.82-7.89 (m, 2H), 8.01(d, 1H,  $J = 8.0$  Hz), 9.67 (s, 1H);  $^{13}\text{C}$  NMR (150 MHz,  $\text{CDCl}_3$ )  $\delta$  -1.1, -0.2, 3.6, 41.9, 124.9, 125.4, 125.6, 127.9, 128.5, 129.0, 129.2, 130.4, 133.5, 134.6, 134.8, 134.9, 137.1, 137.4, 201.6; IR (neat)  $\text{cm}^{-1}$  3042, 2954, 2849, 1718, 1421, 1383, 1251, 1103, 1063, 1023, 838, 785; HRMS (MALDI,  $m/z$ ) calcd for  $\text{C}_{23}\text{H}_{28}\text{OSi}_2\text{Na}$  ( $\text{M}+\text{Na}$ ) $^+$ : 399.1571, found 399.1571.

## 2.4. Reactions with Electrophiles

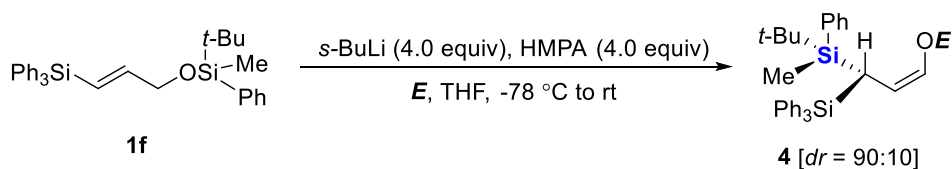

To a solution of **1f** (75mg, 0.15 mmol) in anhyd THF (0.5 mL) and anhyd HMPA (104  $\mu\text{L}$ , 0.60 mmol) under argon atmosphere was added *s*-BuLi (0.60 mL of 1.0 M solution in pentane, 0.60 mmol) at  $-78$   $^\circ\text{C}$ . After stirring for 30 min, electrophiles (0.75 mmol) was added and the resulting solution was warmed to room temperature with stirring for 2 h. The mixture was diluted with  $\text{Et}_2\text{O}$  (5.0 mL), dried over  $\text{Na}_2\text{SO}_4$  and concentrated under reduced pressure. Purification of the crude residue via silica gel flash column chromatography (gradient eluent: 1-5% of  $\text{EtOAc}$  /petroleum ether) afforded **4**.

### Preparation of 4a

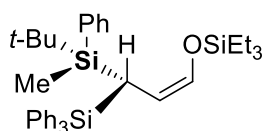

**4a**

**4a:** 60% yield, a yellow oil;  $^1\text{H}$  NMR (400 MHz,  $\text{CDCl}_3$ )  $\delta$  0.02 (s, 3H), 0.73 (q, 6H,  $J = 8.0$  Hz), 0.87 (s, 9H), 1.04 (t, 9H,  $J = 8.0$  Hz), 3.39 (d, 1H,  $J = 12.4$  Hz) (major), 3.14 (d, 1H,  $J = 12.4$  Hz) (minor), 4.65 (dd, 1H,  $J_1 = 12.4$  Hz,  $J_2 = 5.6$  Hz) (major), 4.58 (dd, 1H,  $J_1 = 12.4$  Hz,  $J_2 = 5.6$  Hz) (minor), 6.16 (d, 1H,  $J = 5.6$  Hz), 7.02 (t, 2H,  $J = 7.6$  Hz), 7.16-7.22 (m, 9H), 7.28 (t, 3H,  $J = 7.6$  Hz), 7.41 (d, 6H,  $J = 7.6$  Hz);  $^{13}\text{C}$  NMR (150 MHz,  $\text{CDCl}_3$ )  $\delta$  -7.4, 4.7, 6.7, 7.8, 19.3, 27.4, 107.1, 126.8, 127.2, 127.3, 128.1, 128.7, 134.9, 135.7, 136.0, 136.1, 137.3; IR (neat)  $\text{cm}^{-1}$  3068, 3047, 2957, 2880, 2855, 1637, 1463, 1425, 1264, 1103, 1009, 847, 736; HRMS (MALDI,  $m/z$ ) calcd for  $\text{C}_{38}\text{H}_{50}\text{OSi}_3\text{Na}$  ( $\text{M}+\text{Na}$ ) $^+$ : 629.3062, found 629.3058.

### Preparation of 4b

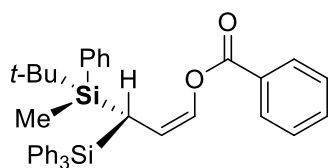

**4b**

**4b:** 65% yield, white solid, m.p.  $114^\circ\text{C}$ ;  $^1\text{H}$  NMR (400 MHz,  $\text{CDCl}_3$ )  $\delta$  0.15 (s, 3H), 0.86 (s, 9H), 3.45 (d, 1H,  $J = 13.2$  Hz) (major), 3.14 (d, 1H,  $J = 13.2$  Hz) (minor), 5.31 (dd, 1H,  $J_1 = 13.2$  Hz,  $J_2 = 6.0$  Hz) (major), 5.17 (dd, 1H,  $J_1 = 13.2$  Hz,  $J_2 = 6.0$  Hz) (minor), 7.06 (t, 2H,  $J = 7.6$  Hz), 7.13 (t, 6H,  $J = 7.6$  Hz), 7.19-7.26 (m, 7H), 7.40 (d, 6H,  $J = 7.6$  Hz), 7.57 (t, 2H,  $J = 7.6$  Hz), 7.67 (t, 1H,  $J = 7.6$  Hz), 8.18 (d, 2H,  $J = 7.6$  Hz);  $^{13}\text{C}$  NMR (150 MHz,  $\text{CDCl}_3$ )  $\delta$  -7.2, 11.6, 19.4, 27.3, 113.6, 127.1, 127.4, 128.5, 128.7, 129.1, 129.6, 129.8, 132.4, 133.4, 134.5, 134.7, 136.0, 136.7, 163.2; IR (neat)  $\text{cm}^{-1}$  3041, 2962, 2928, 2855, 1715, 1424, 1267, 1104, 1043, 947, 799, 702; HRMS (MALDI,  $m/z$ ) calcd for  $\text{C}_{39}\text{H}_{40}\text{O}_2\text{Si}_2\text{Na}$  ( $\text{M}+\text{Na}$ ) $^+$ : 619.2459, found 619.2455.

### Preparation of 4c

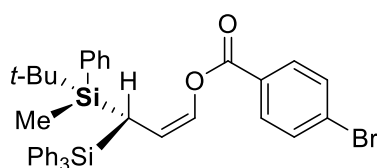

**4c**



(minor), 7.00 (d, 1H,  $J = 6.0$  Hz), 7.06 (t, 2H,  $J = 7.6$  Hz), 7.18 (t, 9H,  $J = 7.6$  Hz), 7.25-7.31 (m, 3H), 7.37 (d, 6H,  $J = 7.6$  Hz);  $^{13}\text{C}$  NMR (150 MHz,  $\text{CDCl}_3$ )  $\delta$  -7.2, 11.3, 19.4, 27.3, 27.6, 32.3, 32.5, 112.9, 127.1, 127.4, 128.5, 129.1, 132.1, 134.5, 134.7, 136.0, 136.5, 169.1; IR (neat)  $\text{cm}^{-1}$  3069, 3048, 2958, 2929, 2856, 1750, 1466, 1427, 1255, 1216, 1107, 818, 781; HRMS (MALDI,  $m/z$ ) calcd for  $\text{C}_{36}\text{H}_{41}\text{O}_2\text{Si}_2\text{Na}$  ( $\text{M}+\text{Na}$ ) $^+$ : 663.1721, found 663.1727.

### Preparation of 4f

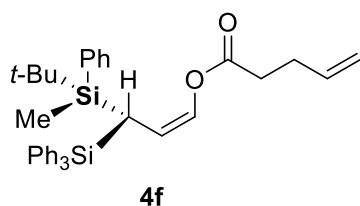

**4f**: 50% yield, white viscous liquid;  $^1\text{H}$  NMR (400 MHz,  $\text{CDCl}_3$ )  $\delta$  0.09 (s, 3H), 0.83 (s, 9H), 2.44-2.49 (m, 2H), 2.55-2.59 (m, 2H), 3.26 (d, 1H,  $J = 13.2$  Hz) (major), 2.96 (d, 1H,  $J = 13.2$  Hz) (minor), 5.08 (d, 1H,  $J = 10.0$  Hz), 5.12-5.19 (m, 2H), 5.89 (ddt, 1H,  $J_1 = 16.8$  Hz,  $J_2 = 10.0$  Hz,  $J_3 = 6.0$  Hz), 7.01 (d, 1H,  $J = 6.0$  Hz), 7.05 (t, 2H,  $J = 7.2$  Hz), 7.16-7.20 (m, 9H), 7.25-7.31 (m, 3H), 7.37 (d, 6H,  $J = 7.2$  Hz);  $^{13}\text{C}$  NMR (150 MHz,  $\text{CDCl}_3$ )  $\delta$  -7.3, 11.1, 19.4, 27.3, 28.7, 33.5, 112.6, 115.8, 127.0, 127.3, 128.4, 129.0, 132.2, 134.6, 134.7, 136.0, 136.4, 136.5, 169.5; IR (neat)  $\text{cm}^{-1}$  3070, 3048, 2958, 2928, 2856, 1752, 1427, 1234, 1151, 1106, 818, 782; HRMS (MALDI,  $m/z$ ) calcd for  $\text{C}_{37}\text{H}_{42}\text{O}_2\text{Si}_2\text{Na}$  ( $\text{M}+\text{Na}$ ) $^+$ : 597.2616, found 597.2612.

### Preparation of 4g

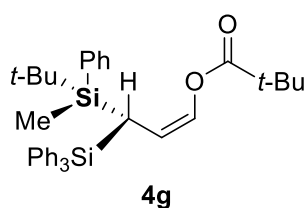

**4g**: 66% yield, white viscous liquid;  $^1\text{H}$  NMR (400 MHz,  $\text{CDCl}_3$ )  $\delta$  0.10 (s, 3H), 0.84 (s, 9H), 1.33 (s, 9H), 3.28 (d, 1H,  $J = 13.2$  Hz) (major), 2.97 (d, 1H,  $J = 13.2$  Hz) (minor), 5.17 (dd, 1H,  $J_1 = 13.2$  Hz,  $J_2 = 6.0$  Hz) (major), 5.05 (dd, 1H,  $J_1 = 13.2$  Hz,  $J_2 = 6.0$  Hz) (minor), 7.00-7.06 (m, 3H), 7.15-7.19 (m, 8H), 7.21-7.24 (m, 1H), 7.29 (t, 3H,  $J = 7.2$  Hz) 7.36 (d, 6H,  $J = 7.2$  Hz);  $^{13}\text{C}$  NMR (150 MHz,  $\text{CDCl}_3$ )  $\delta$  -7.1, 11.0, 19.4, 27.2, 38.9, 112.6, 127.0, 127.3, 127.4, 128.4, 129.0, 132.4,

134.6, 134.7, 135.9, 136.5, 174.9; IR (neat)  $\text{cm}^{-1}$  3069, 3049, 2929, 1743, 1477, 1427, 1393, 1367, 1276, 1133, 1053, 817; HRMS (MALDI,  $m/z$ ) calcd for  $\text{C}_{37}\text{H}_{44}\text{O}_2\text{Si}_2\text{Na}$  ( $\text{M}+\text{Na}$ ) $^+$ : 599.2772, found 599.2772.

### Preparation of 4h

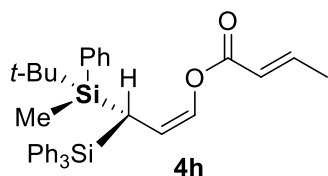

**4h**: 50% yield, white viscous liquid;  $^1\text{H}$  NMR (400 MHz,  $\text{CDCl}_3$ )  $\delta$  0.09 (s, 3H), 0.83 (s, 9H), 2.02 (d, 3H,  $J = 6.8$  Hz), 3.32 (d, 1H,  $J = 13.2$  Hz) (major), 3.03 (d, 1H,  $J = 13.2$  Hz) (minor), 5.16 (dd, 1H,  $J_1 = 13.2$  Hz,  $J_2 = 6.0$  Hz) (major), 5.04 (dd, 1H,  $J_1 = 13.2$  Hz,  $J_2 = 6.0$  Hz) (minor), 6.04 (d, 1H,  $J = 15.6$  Hz) (major), 5.89 (d, 1H,  $J = 15.6$  Hz) (minor), 7.04-7.07 (m, 3H), 7.15-7.21 (m, 10H), 7.28 (t, 3H,  $J = 7.2$  Hz), 7.38 (d, 6H,  $J = 7.2$  Hz);  $^{13}\text{C}$  NMR (150 MHz,  $\text{CDCl}_3$ )  $\delta$  -7.3, 11.0, 18.4, 19.3, 27.3, 112.8, 121.9, 127.0, 127.3, 128.4, 129.0, 132.2, 134.6, 134.7, 136.0, 136.6, 146.3, 162.9; IR (neat)  $\text{cm}^{-1}$  3048, 3018, 2929, 2856, 1733, 1648, 1466, 1429, 1104, 819, 782; HRMS (MALDI,  $m/z$ ) calcd for  $\text{C}_{36}\text{H}_{40}\text{O}_2\text{Si}_2\text{Na}$  ( $\text{M}+\text{Na}$ ) $^+$ : 583.2459, found 583.2461.

### Preparation of 4i

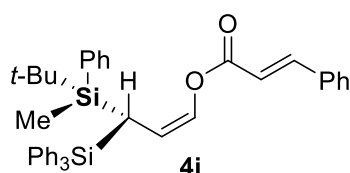

**4i**: 55% yield, white solid, m.p. 165°C;  $^1\text{H}$  NMR (400 MHz,  $\text{CDCl}_3$ )  $\delta$  0.13 (s, 3H), 0.86 (s, 9H), 3.38 (d, 1H,  $J = 13.2$  Hz) (major), 3.08 (d, 1H,  $J = 13.2$  Hz) (minor), 5.23 (dd, 1H,  $J_1 = 13.2$  Hz,  $J_2 = 6.4$  Hz) (major), 5.10 (dd, 1H,  $J_1 = 13.2$  Hz,  $J_2 = 6.4$  Hz) (minor), 6.58 (d, 1H,  $J = 16.0$  Hz) (major), 6.43 (d, 1H,  $J = 16.0$  Hz) (minor), 7.06 (t, 2H,  $J = 7.6$  Hz), 7.12 (d, 1H,  $J = 6.4$  Hz), 7.18 (t, 6H,  $J = 7.6$  Hz), 7.23-7.29 (m, 6H), 7.40 (d, 6H,  $J = 7.6$  Hz), 7.47-7.48 (m, 3H), 7.63-7.65 (m, 2H), 7.84 (d, 1H,  $J = 16.0$  Hz);  $^{13}\text{C}$  NMR (100 MHz,  $\text{CDCl}_3$ )  $\delta$  -7.3, 11.3, 19.4, 27.3, 113.1, 117.1, 127.1, 127.4, 128.3, 128.5, 129.0, 129.1, 130.7, 132.3, 134.3, 134.6, 134.7, 136.0, 136.6, 146.1, 163.5; IR (neat)  $\text{cm}^{-1}$  3048, 2927, 2853, 1734, 1634, 1425, 1149, 1105, 815; HRMS (MALDI,  $m/z$ ) calcd for



C<sub>41</sub>H<sub>42</sub>O<sub>2</sub>Si<sub>2</sub>Na (M+Na)<sup>+</sup>: 645.2616, found 645.2617.

### Preparation of 4j

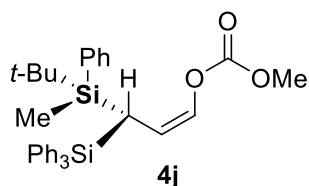

**4j**: 70% yield, white viscous liquid; <sup>1</sup>H NMR (400 MHz, CDCl<sub>3</sub>) δ 0.08 (s, 3H), 0.83 (s, 9H), 3.26 (d, 1H, *J* = 13.2 Hz) (major), 2.98 (d, 1H, *J* = 13.2 Hz) (minor), 3.88 (s, 3H) (major), 3.78 (s, 3H) (minor), 5.14 (dd, 1H, *J*<sub>1</sub> = 13.2 Hz, *J*<sub>2</sub> = 6.0 Hz) (major), 5.01 (dd, 1H, *J*<sub>1</sub> = 13.2 Hz, *J*<sub>2</sub> = 6.0 Hz) (minor), 6.74 (d, 1H, *J* = 6.0 Hz) (major), 6.67 (d, 1H, *J* = 6.0 Hz) (minor), 7.02 (t, 2H, *J* = 7.6 Hz), 7.17 (t, 9H, *J* = 7.6 Hz), 7.25-7.30 (m, 3H), 7.39 (d, 6H, *J* = 7.6 Hz); <sup>13</sup>C NMR (150 MHz, CDCl<sub>3</sub>) δ -7.4, 10.6, 19.3, 27.3, 55.1, 112.9, 127.0, 127.3, 128.4, 128.9, 133.6, 134.4, 134.8, 136.1, 136.2, 153.3; IR (neat) cm<sup>-1</sup> 3069, 3048, 2960, 2928, 2855, 1762, 1464, 1432, 1260, 1105, 1029, 948, 792; HRMS (MALDI, *m/z*) calcd for C<sub>34</sub>H<sub>38</sub>O<sub>3</sub>Si<sub>2</sub>Na (M+Na)<sup>+</sup>: 573.2252, found 573.2249.

### Preparation of 4k

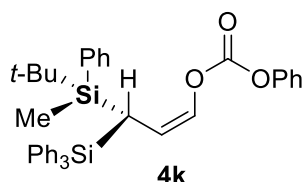

**4k**: 70% yield, white solid, m.p. 68°C; <sup>1</sup>H NMR (400 MHz, CDCl<sub>3</sub>) δ 0.10 (s, 3H), 0.85 (s, 9H), 3.25 (d, 1H, *J* = 13.2 Hz) (major), 2.92 (d, 1H, *J* = 13.2 Hz) (minor), 5.24 (dd, 1H, *J*<sub>1</sub> = 13.2 Hz, *J*<sub>2</sub> = 6.0 Hz) (major), 5.10 (dd, 1H, *J*<sub>1</sub> = 13.2 Hz, *J*<sub>2</sub> = 6.0 Hz) (minor), 6.83 (d, 1H, *J* = 6.0 Hz), 7.03 (t, 2H, *J* = 7.6 Hz), 7.16-7.21 (m, 8H), 7.25-7.29 (m, 5H), 7.39-7.46 (m, 10H); <sup>13</sup>C NMR (150 MHz, CDCl<sub>3</sub>) δ -7.4, 10.9, 19.4, 27.3, 113.9, 120.9, 121.0, 126.3, 127.0, 127.4, 128.5, 129.1, 129.5, 129.6, 133.5, 134.3, 134.8, 136.1, 150.9; IR (neat) cm<sup>-1</sup> 3065, 2916, 2926, 1773, 1489, 1426, 1258, 1104, 1074, 872, 797; HRMS (MALDI, *m/z*) calcd for C<sub>39</sub>H<sub>40</sub>O<sub>3</sub>Si<sub>2</sub>Na (M+Na)<sup>+</sup>: 635.2408, found 635.2414.

### Preparation of 4l

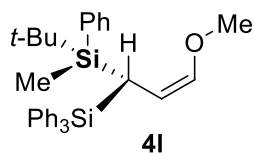

**4I**: 40% yield, white viscous liquid;  $^1\text{H}$  NMR (400 MHz,  $\text{CDCl}_3$ )  $\delta$  0.08 (s, 3H), 0.83 (s, 9H), 3.26 (d, 1H,  $J = 13.2$  Hz) (major), 2.97 (d, 1H,  $J = 13.2$  Hz) (minor), 3.88 (s, 3H) (major), 3.79 (s, 3H) (minor), 5.14 (dd, 1H,  $J_1 = 13.2$  Hz,  $J_2 = 6.0$  Hz) (major), 5.01 (dd, 1H,  $J_1 = 13.2$  Hz,  $J_2 = 6.0$  Hz) (minor), 6.74 (d, 1H,  $J = 6.0$  Hz) (major), 6.67 (d, 1H,  $J = 6.0$  Hz) (minor), 7.02 (t, 2H,  $J = 7.2$  Hz), 7.17 (t, 8H,  $J = 7.2$  Hz), 7.22-7.29 (m, 4H), 7.39 (d, 6H,  $J = 7.6$  Hz);  $^{13}\text{C}$  NMR (150 MHz,  $\text{CDCl}_3$ )  $\delta$  -7.4, 8.7, 19.3, 27.4, 59.0, 104.8, 126.8, 127.2, 128.1, 128.7, 134.8, 135.4, 136.0, 136.9, 144.1; IR (neat)  $\text{cm}^{-1}$  3068, 2925, 2852, 1426, 1262, 1104, 819, 781; HRMS (MALDI,  $m/z$ ) calcd for  $\text{C}_{33}\text{H}_{38}\text{OSi}_2\text{Na}$  ( $\text{M}+\text{Na}$ ) $^+$ : 529.2353, found 529.2349.

## 2.5. Preparation of Enantiomerically Defined 10 and Its Retro-[1,4]-Brook Rearrangement to Form 11.

### Preparation of 10

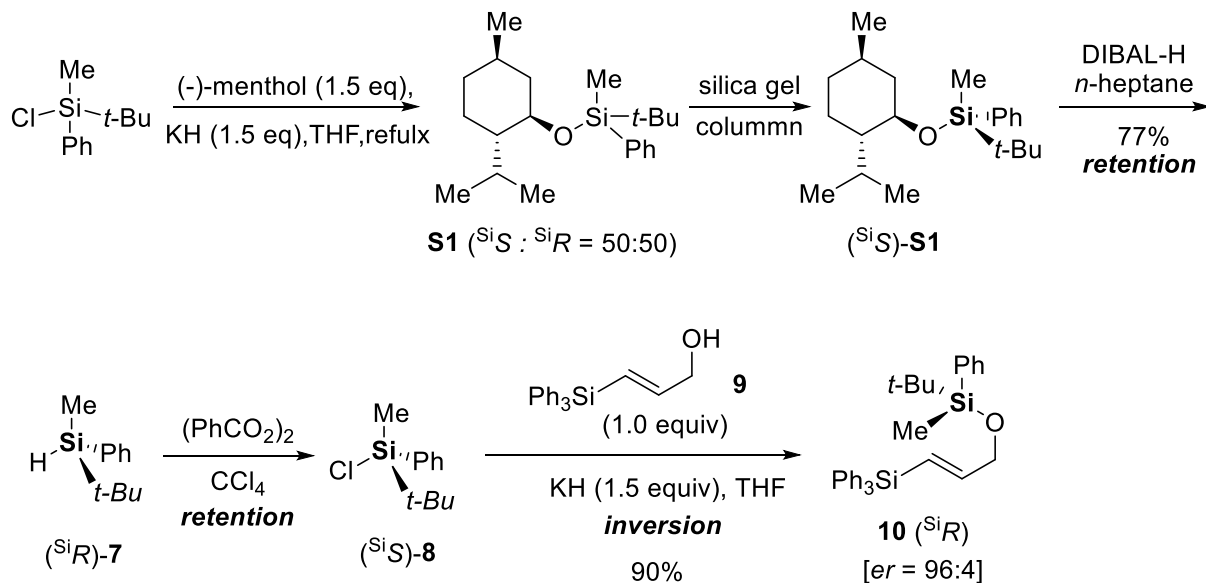

To a suspension of KH (1.13 g, 8.5 mmol, 30 % w/w) in THF (4.0 mL) was added (-)-menthol (1.32 g, 8.5 mmol) in THF (6.0 mL) at 0 °C under argon atmosphere. After refluxed for 3 h, a solution of *t*-BuPhMeSiCl (1.2 g, 5.66 mmol) in THF (3.0 mL) was added at room temperature. Heating at reflux for 20 h, the mixture was quenched with careful addition of  $\text{H}_2\text{O}$  followed by neutralization ( $\text{pH} = 7$ ) with aq. 10% HCl. The organic layer was separated and the aqueous phase was extracted

with Et<sub>2</sub>O (3 × 10 mL). The combined organic layers were dried over Na<sub>2</sub>SO<sub>4</sub> and concentrated under reduced pressure. The crude product was purified by flash chromatography on silica gel with cyclohexane as eluent, affording a mixture of (<sup>Si</sup>R)-**S1** and (<sup>Si</sup>S)-**S1** (1.01g, 60%, *dr* = 50:50) as a colorless oil. After repeated flash chromatography, (<sup>Si</sup>S)-**S1** and (<sup>Si</sup>R)-**S1** were separated as colorless oil.

To a solution of (<sup>Si</sup>S)-**S1** (620 mg, 1.86 mmol) in dry *n*-heptane (9.0 mL) was added DIBAL-H (5.0 mL, 7.47 mmol, 1M solution in hexane) slowly at 0 °C under argon atmosphere. The mixture was heated at reflux for 5 h before quenching at 0 °C with careful addition of H<sub>2</sub>O followed by neutralization (pH = 7) with aq. 10% HCl. The mixture was extracted with Et<sub>2</sub>O (3 × 5 mL). The combined organic layers were dried over Na<sub>2</sub>SO<sub>4</sub> and concentrated under reduced pressure. Purification of the crude residue via silica gel flash column chromatography (gradient eluent: petroleum ether) afforded colorless oil (<sup>Si</sup>R)-**7**<sup>3</sup> (308 mg, 93% yield). HPLC (Phenomenex Lux® 5µm Cellulose-3 column, solvent *n*-heptane, flow rate 0.7ml/min): *t*<sub>R</sub>=5.083 min for (<sup>Si</sup>R)-**7**. <sup>1</sup>H NMR (400 MHz, CDCl<sub>3</sub>) δ 0.34 (d, 3H, *J* = 3.6 Hz), 0.95 (s, 9H), 4.14 (q, 1H, *J* = 3.6 Hz), 7.34-7.39 (m, 3H), 7.52-7.55 (m, 2H). [ $\alpha$ ]<sub>D</sub><sup>25</sup> -2.4 (c = 1.0, CHCl<sub>3</sub>).

To a solution of (<sup>Si</sup>R)-**7** (360 mg, 2.02 mmol) in CCl<sub>4</sub> (14.0 mL) was added benzoyl peroxide (50 mg, 0.2 mmol). The mixture was refluxed for 21 h followed by stirring for 3.5 h at room temperature.<sup>4</sup> The solvent of the mixture was removed under reduced pressure. The crude product (<sup>Si</sup>S)-**8** was used without purification in next step.

To a suspension of KH (270 mg, 2.02 mmol, 30 % w/w) in THF (1.0 mL) under argon atmosphere was added **9** (420 mg, 1.35 mmol in 1.0 mL THF) slowly at 0 °C. The mixture was stirred for 10 min before adding a solution of (<sup>Si</sup>S)-**8** in 1.2 mL THF at -78 °C. The reaction was maintained at -78 °C for 12 h, and then quenched at 0 °C by careful addition of H<sub>2</sub>O followed by neutralization (pH = 7) with aq. 10% HCl. The mixture was extracted with Et<sub>2</sub>O (3 × 5 mL). The combined organic layers were dried over Na<sub>2</sub>SO<sub>4</sub> and concentrated under reduced pressure. Purification of the crude residue via silica gel flash column chromatography (gradient eluent: 1-2% of EtOAc/petroleum ether) afforded white solid (<sup>Si</sup>R)-**10** (600 mg, 90% yield, *er* = 96:4, m.p 44 °C), HPLC (Chiralpak OD column, *n*-hexane, 1.5 mL/min, UV 220 nm, *t*<sub>major</sub> = 8.621 min, *t*<sub>minor</sub> =

3. V. T. Trepohl, R. Fröhlich, M. Oestreich, *Tetrahedron* **2009**, *65*, 6510-6518.

4. K. Igawa, N. Kokan, K. Tomooka, *Angew. Chem.* **2010**, *122*, 740; *Angew. Chem. Int. Ed.* **2010**, *49*, 728-731.

13.227 min),  $[\alpha]_D^{20} = +6.78$  ( $c = 1.0$  in  $\text{CHCl}_3$ );  $^1\text{H NMR}$  (400 MHz,  $\text{CDCl}_3$ )  $\delta$  0.39 (s, 3H), 0.97 (s, 9H), 4.29-4.38 (m, 2H), 6.25 (dt, 1H,  $J_1 = 18.4$  Hz,  $J_2 = 3.2$  Hz), 6.65 (d, 1H,  $J = 18.4$  Hz), 7.37-7.43 (m, 12H), 7.55 (d, 6H,  $J = 6.8$  Hz), 7.58 (d, 2H,  $J = 6.8$  Hz);  $^{13}\text{C NMR}$  (150 MHz,  $\text{CDCl}_3$ )  $\delta$  -7.1, 18.4, 25.9, 65.4, 121.4, 127.6, 127.8, 129.4, 129.5, 134.4, 134.7, 135.6, 135.9, 150.8.

### Reduction of (*Si*R)-10 to (*Si*S)-7

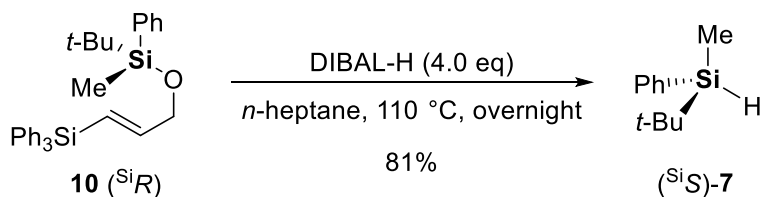

To a solution of (*Si*R)-**10** (0.16 mmol, 80 mg) in dry *n*-heptane (0.9 mL) under argon atmosphere was added DIBAL-H (1.80 mmol, 1.8 mL, 1.0 M solution in hexane) dropwise at 0 °C. Then the reaction mixture was subsequently heated to 110 °C and refluxed overnight. Finally, the reaction was cooled down to room temperature and quenched with  $\text{H}_2\text{O}$  followed by neutralization with aq. 10% HCl. The organic layer was separated and the aqueous layer was extracted with  $\text{Et}_2\text{O}$  for three times, dried over  $\text{Na}_2\text{SO}_4$  and concentrated under reduced pressure. Purification of the crude product via silica gel flash column chromatography (gradient eluent: cyclohexanes) afforded (*Si*S)-**7** (22 mg, 81%,  $er = 93:7$ ) as a colorless oil. HPLC (Phenomenex Lux® 5  $\mu\text{m}$  Cellulose-3 column, solvent *n*-heptane, flow rate 0.7 mL/min):  $t_R = 5.019$  min for (*Si*R)-**7** (minor enantiomer),  $t_R = 5.164$  min for (*Si*S)-**7** (major enantiomer).  $[\alpha]_D^{25} = 1.4$  ( $c = 1.0$ ,  $\text{CHCl}_3$ ).  $^1\text{H NMR}$  (400 MHz,  $\text{CDCl}_3$ )  $\delta$  0.34 (d, 3H,  $J = 3.6$  Hz), 0.95 (s, 9H), 4.14 (q, 1H,  $J = 3.6$  Hz), 7.34-7.39 (m, 3H), 7.52-7.55 (m, 2H).

### Preparation of 11

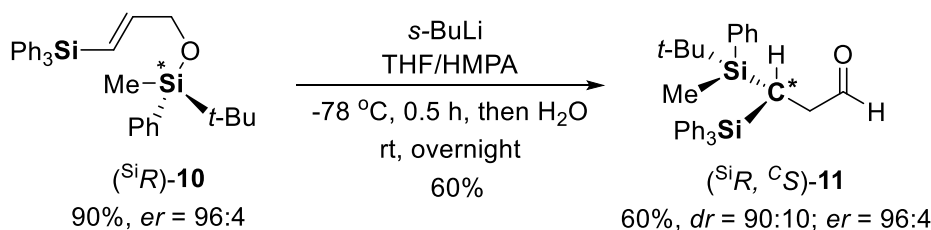

To a solution (*Si*R)-**10** (150 mg, 0.3 mmol) in anhyd THF (1.0 mL) and anhyd HMPA (0.2 mL, 1.20 mmol) under argon atmosphere was added *s*-BuLi (1.2 mL of 1.0 M solution in pentane, 1.2

mmol) at -78 °C. After stirring for 30 min, the reaction was quenched with H<sub>2</sub>O and was warmed to room temperature with stirring overnight. The combined organic layers were diluted with Et<sub>2</sub>O (5.0 mL), dried over Na<sub>2</sub>SO<sub>4</sub> and concentrated under reduced pressure. Purification of the crude residue via silica gel flash column chromatography (gradient eluent: 1-5% of EtOAc/petroleum ether) afforded pure white solid (<sup>i</sup>R, <sup>c</sup>S)-**11** (90 mg, 60% yield, *er* = 96:4, m.p. 116 °C), HPLC (Chiralpak OD column, 0.5% 2-propamol/*n*-hexane, 1.0 mL/min, UV 220 nm, *t*<sub>minor</sub> = 8.671 min, *t*<sub>major</sub> = 11.425 min), [α]<sub>D</sub><sup>20</sup> = -12.75 (*c* = 1.0 in CHCl<sub>3</sub>), the crystal of the product (<sup>i</sup>R, <sup>c</sup>S)-**11** was obtained from *n*-hexane; <sup>1</sup>H NMR (400 MHz, CDCl<sub>3</sub>) δ 0.11 (s, 3H), 0.86 (s, 9H), 2.54 (t, 1H, *J* = 4.8 Hz), 3.06 (dd, 1H, *J*<sub>1</sub> = 20.0 Hz, *J*<sub>2</sub> = 4.8 Hz), 3.17 (dd, 1H, *J*<sub>1</sub> = 20.0 Hz, *J*<sub>2</sub> = 4.8 Hz), 6.97 (t, 2H, *J* = 7.2 Hz), 7.14 (t, 3H, *J* = 7.2 Hz), 7.21-7.26 (m, 6H), 7.32 (t, 3H, *J* = 7.2 Hz), 7.40 (d, 6H, *J* = 7.2 Hz), 9.59 (s, 1H); <sup>13</sup>C NMR (100 MHz, CDCl<sub>3</sub>) δ -7.1, -2.1, 19.2, 27.7, 42.6, 126.8, 127.5, 128.4, 129.1, 134.6, 134.9, 135.9, 200.8.

### 3. HPLC copies

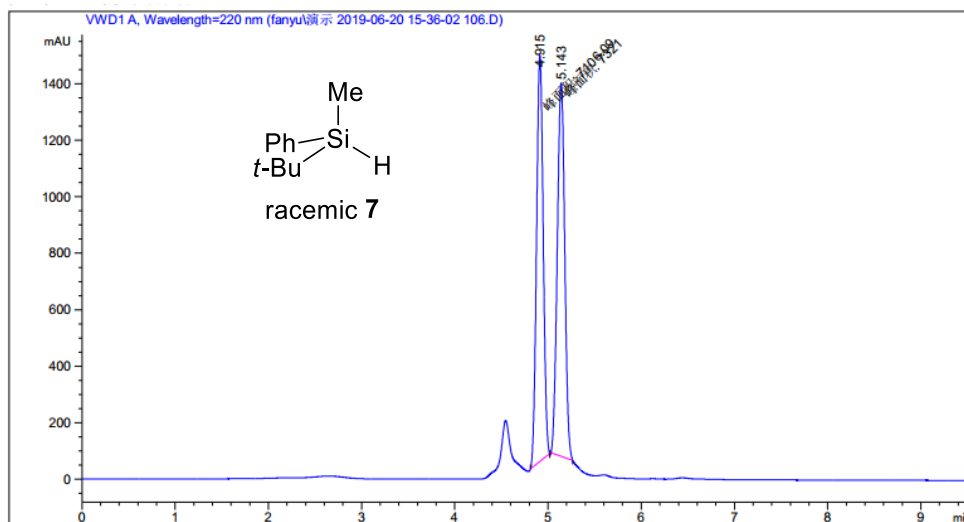

#### 面积百分比报告

排序 : 信号  
乘积因子 : 1.0000  
稀释因子 : 1.0000  
内标使用乘积因子和稀释因子

信号 1: VWD1 A, Wavelength=220 nm

| 峰 # | 保留时间 [min] | 类型 | 峰宽 [min] | 峰面积 [mAU*s] | 峰高 [mAU]   | 峰面积 %   |
|-----|------------|----|----------|-------------|------------|---------|
| 1   | 4.915      | MM | 0.0824   | 7106.09229  | 1438.01013 | 49.2552 |
| 2   | 5.143      | MM | 0.0923   | 7321.00391  | 1322.43921 | 50.7448 |

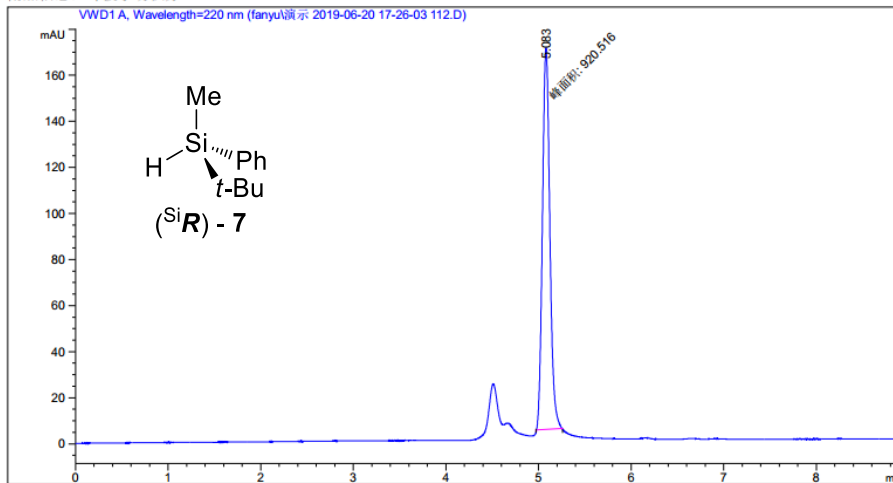

面积百分比报告

排序 : 信号  
乘积因子 : 1.0000  
稀释因子 : 1.0000  
内标使用乘积因子和稀释因子

信号 1: VWD1 A, Wavelength=220 nm

| 峰 # | 保留时间 [min] | 类型 | 峰宽 [min] | 峰面积 [mAU*s] | 峰高 [mAU]  | 峰面积 %    |
|-----|------------|----|----------|-------------|-----------|----------|
| 1   | 5.083      | MM | 0.0926   | 920.51563   | 165.59372 | 100.0000 |

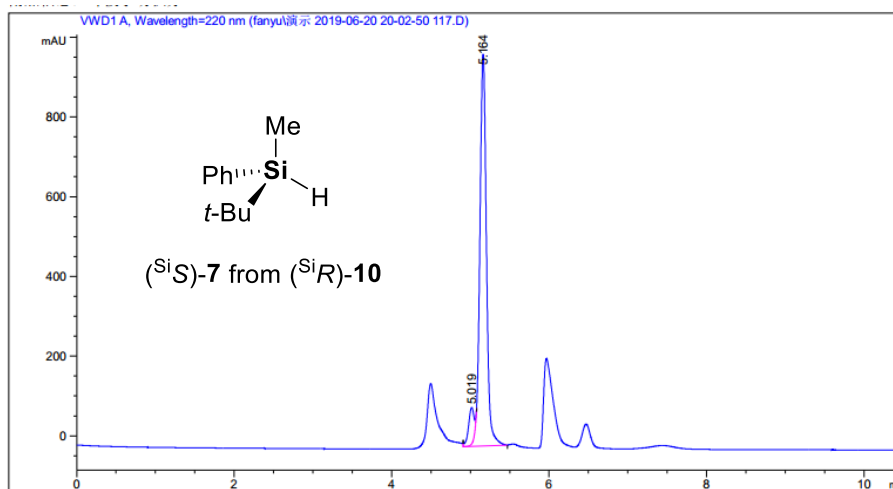

面积百分比报告

排序 : 信号  
乘积因子 : 1.0000  
稀释因子 : 1.0000  
内标使用乘积因子和稀释因子

信号 1: VWD1 A, Wavelength=220 nm

| 峰 # | 保留时间 [min] | 类型   | 峰宽 [min] | 峰面积 [mAU*s] | 峰高 [mAU]  | 峰面积 %   |
|-----|------------|------|----------|-------------|-----------|---------|
| 1   | 5.019      | VV E | 0.0731   | 435.45178   | 91.31609  | 7.0784  |
| 2   | 5.164      | VB R | 0.0893   | 5716.34570  | 983.28766 | 92.9216 |

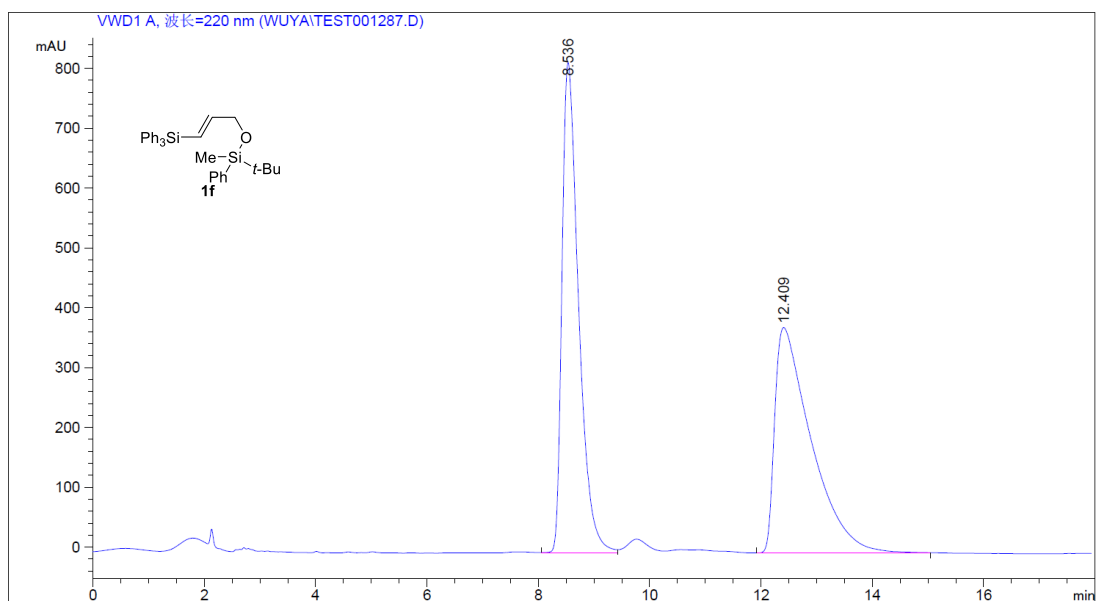

| 峰 # | 保留时间 [min] | 类型 | 峰宽 [min] | 峰面积 mAU *s | 峰高 [mAU]  | 峰面积 %   |
|-----|------------|----|----------|------------|-----------|---------|
| 1   | 8.536      | VV | 0.3144   | 1.69726e4  | 819.49805 | 49.8143 |
| 2   | 12.409     | VB | 0.6590   | 1.70991e4  | 376.79620 | 50.1857 |

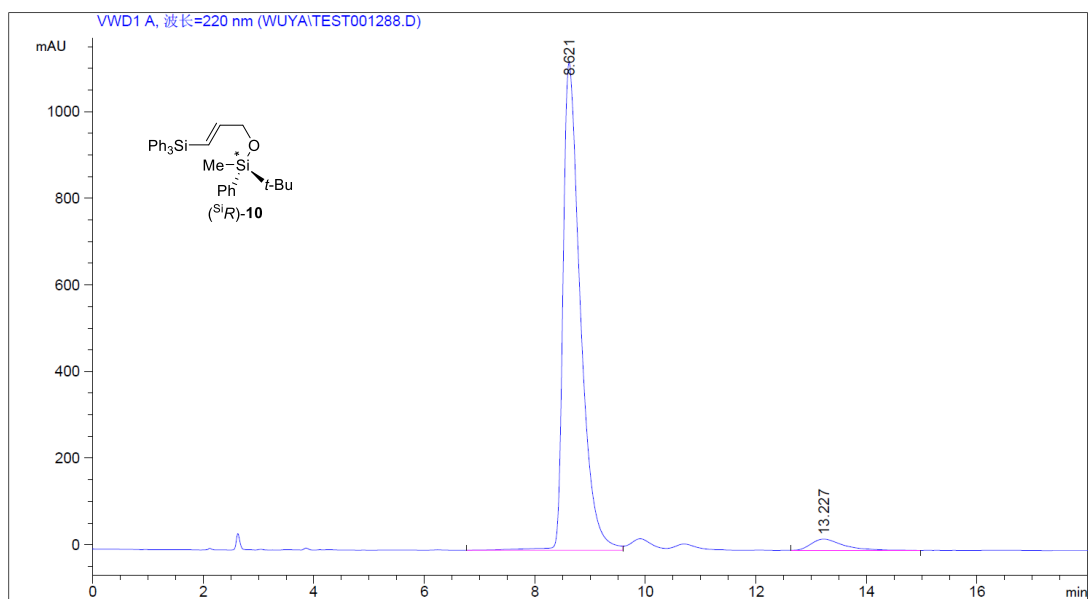

| 峰 # | 保留时间 [min] | 类型 | 峰宽 [min] | 峰面积 mAU *s | 峰高 [mAU]   | 峰面积 %   |
|-----|------------|----|----------|------------|------------|---------|
| 1   | 8.621      | VV | 0.3259   | 2.44341e4  | 1126.23804 | 95.7299 |
| 2   | 13.227     | VV | 0.6118   | 1089.89514 | 26.20897   | 4.2701  |

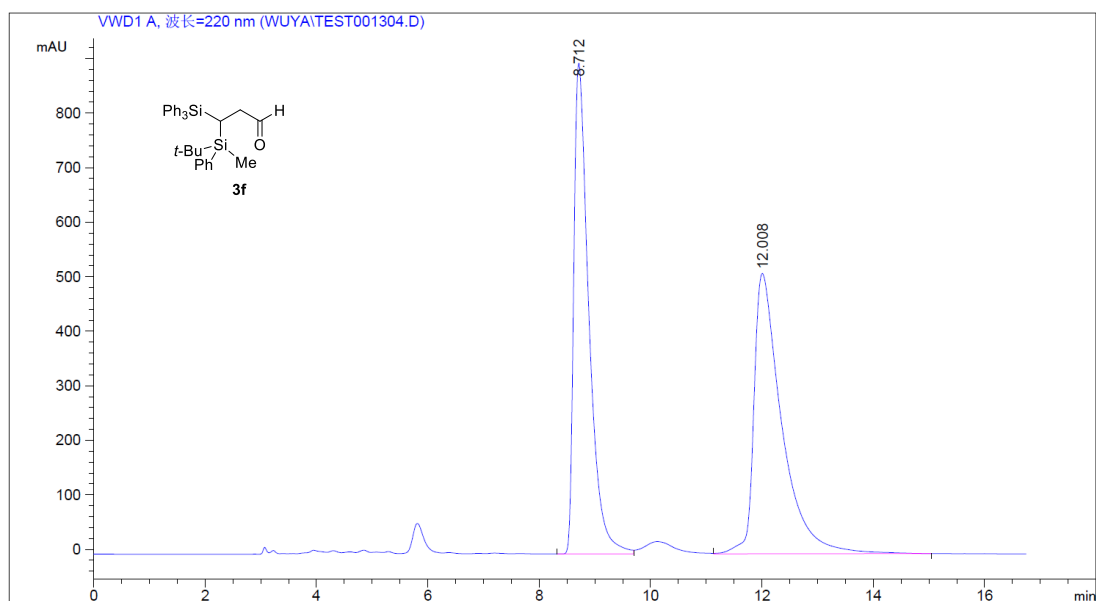

| 峰 # | 保留时间 [min] | 类型 | 峰宽 [min] | 峰面积 mAU *s | 峰高 [mAU]  | 峰面积 %   |
|-----|------------|----|----------|------------|-----------|---------|
| 1   | 8.712      | VV | 0.2803   | 1.69041e4  | 900.02802 | 48.6755 |
| 2   | 12.008     | VB | 0.5051   | 1.78241e4  | 513.94238 | 51.3245 |

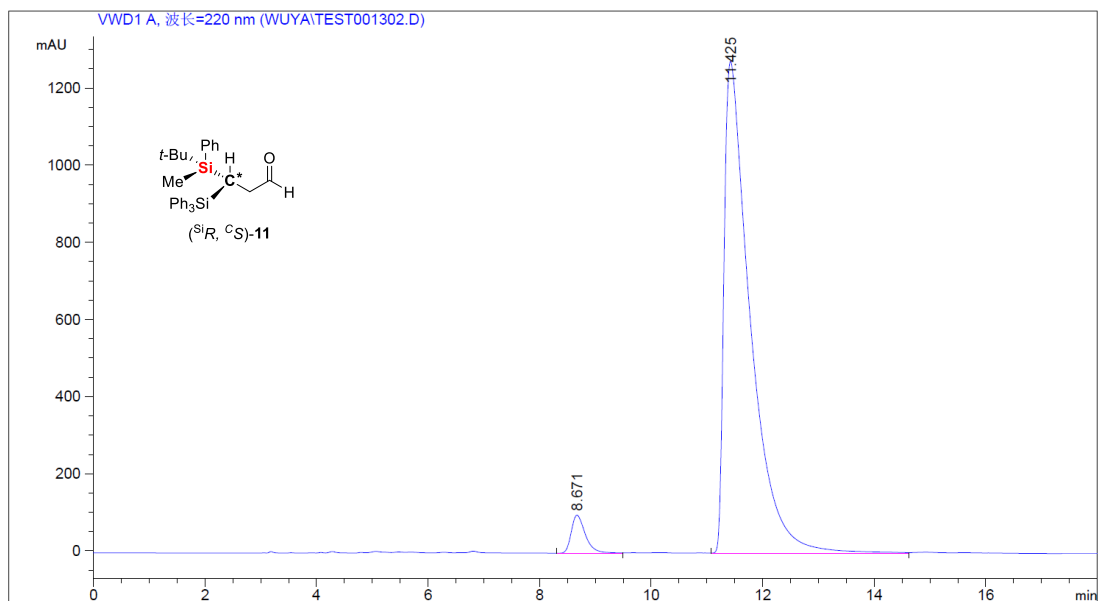

| 峰 # | 保留时间 [min] | 类型 | 峰宽 [min] | 峰面积 mAU *s | 峰高 [mAU]   | 峰面积 %   |
|-----|------------|----|----------|------------|------------|---------|
| 1   | 8.671      | VV | 0.2675   | 1734.27197 | 98.74428   | 4.0155  |
| 2   | 11.425     | VV | 0.4667   | 4.14548e4  | 1274.91125 | 95.9845 |



## 4. Computational Details

All calculations were performed using Gaussian 09 program package<sup>[1]</sup>. Geometries were fully optimized at the B3LYP-D3(BJ)/6-311G(d,p)<sup>[2,3]</sup> level in THF solvent and characterized by frequency analysis. The self-consistent reaction field (SCRF) method with SMD<sup>[4, 5]</sup> solvation model was used to evaluate solvent effect on reaction. The transition states were checked by intrinsic reaction coordinate (IRC) calculations.<sup>[6]</sup> The Gibbs free energies ( $G_{195K}$ ) corrected by both solvent and zero-point vibrational effect were used in the discussions.

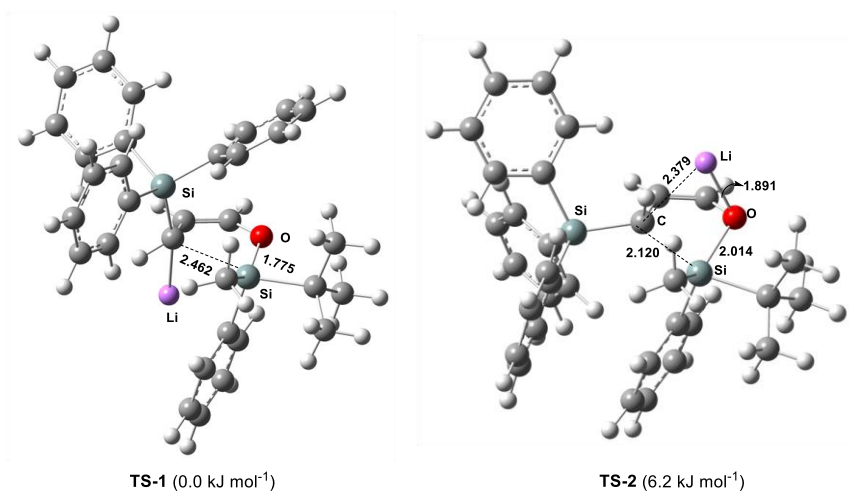

**Figure 1.** Optimized geometries of transition states TS-1 and TS-2 and their energy difference calculated at the B3LYP-D3(BJ)(SMD, THF)/6-311G(d,p) level.

## References:

- [1] Gaussian 09 (Revision E.01), M. J. Frisch, G. W. Trucks, H. B. Schlegel, G. E. Scuseria, M. A. Robb, J. R. Cheeseman, G. Scalmani, V. Barone, B. Mennucci, G. A. Petersson, H. Nakatsuji, M. Caricato, X. Li, H. P. Hratchian, A. F. Izmaylov, J. Bloino, G. Zheng, J. L. Sonnenberg, M. Hada, M. Ehara, K. Toyota, R. Fukuda, J. Hasegawa, M. Ishida, T. Nakajima, Y. Honda, O. Kitao, H. Nakai, T. Vreven, J. A. Montgomery, Jr., J. E. Peralta, F. Ogliaro, M. Bearpark, J. J. Heyd, E. Brothers, K. N. Kudin, V. N. Staroverov, T. Keith, R. Kobayashi, J. Normand, K. Raghavachari, A. Rendell, J. C. Burant, S. S. Iyengar, J. Tomasi, M. Cossi, N. Rega, J. M. Millam, M. Klene, J.E. Knox, J. B. Cross, V. Bakken, C. Adamo, J. Jaramillo, R. Gomperts, R. E. Stratmann, O. Yazyev, A. J. Austin, R. Cammi, C. Pomelli, J. W. Ochterski, R. L. Martin, K. Morokuma, V. G. Zakrzewski, G. A. Voth, P. Salvador, J. J. Dannenberg, S. Dapprich, A. D. Daniels, O. Farkas, J. B. Foresman, J. V. Ortiz, J. Cioslowski, and D. J. Fox, Gaussian, Inc., Wallingford CT, 2013.
- [2] A. D. Becke *J. Chem. Phys.* 1993, 98, 5648-5652.
- [3] S. Grimme, J. Antony, S. Ehrlich, H. Krieg *J. Chem. Phys.* 2010, 132, 154104-154119.
- [4] A. V. Marenich, C. J. Cramer, D. G. Truhlar *J. Phys. Chem. B* 2009, 113, 6378-6396.

[5] V. S. Bernales, A. V. Marenich, R. Contreras, C. J. Cramer, D. G. Truhlar J. Phys. Chem. B 2012, 116, 9122-9129.

[6] C. Gonzalez, H. B. Schlegel J. Chem. Phys. 1989, 90, 2154-2161.

## Cartesian coordinates of all stationary points

### TS-1

Zero-point correction= 0.57791 a.u.

Thermal correction to Gibbs Free Energy= 0.54226 a.u.

Sum of electronic and zero-point Energies= -1902.29890 a.u.

Sum of electronic and thermal Free Energies= -1902.33455 a.u.

The number of imaginary frequencies 1

### Standard orientation

| Center<br>Number | Atomic<br>Number | Atomic<br>Type | Coordinates (Angstroms) |           |           |
|------------------|------------------|----------------|-------------------------|-----------|-----------|
|                  |                  |                | X                       | Y         | Z         |
| 1                | 14               | 0              | 1.513006                | 0.209771  | -0.038878 |
| 2                | 6                | 0              | 1.426705                | -1.606801 | 0.484105  |
| 3                | 6                | 0              | 2.082815                | 1.277170  | 1.417543  |
| 4                | 6                | 0              | 2.940352                | 0.334862  | -1.292088 |
| 5                | 6                | 0              | 1.307637                | -2.607795 | -0.494503 |
| 6                | 6                | 0              | 1.204601                | -3.952569 | -0.148289 |
| 7                | 6                | 0              | 1.227831                | -4.332391 | 1.192922  |
| 8                | 6                | 0              | 1.354796                | -3.358413 | 2.180243  |
| 9                | 6                | 0              | 1.451936                | -2.013583 | 1.825882  |
| 10               | 6                | 0              | 3.220710                | 0.906147  | 2.152529  |
| 11               | 6                | 0              | 3.715923                | 1.708219  | 3.178067  |
| 12               | 6                | 0              | 3.086591                | 2.913829  | 3.486022  |
| 13               | 6                | 0              | 1.472507                | 2.497437  | 1.739328  |
| 14               | 6                | 0              | 1.965085                | 3.309308  | 2.760469  |
| 15               | 6                | 0              | 3.053559                | 1.486688  | -2.087561 |
| 16               | 6                | 0              | 4.104219                | 1.651034  | -2.986634 |
| 17               | 6                | 0              | 3.931168                | -0.647545 | -1.430677 |
| 18               | 6                | 0              | 4.986634                | -0.492010 | -2.330074 |
| 19               | 6                | 0              | 5.075348                | 0.657338  | -3.111813 |
| 20               | 1                | 0              | 1.294444                | -2.334005 | -1.543011 |

|    |    |   |           |           |           |
|----|----|---|-----------|-----------|-----------|
| 21 | 1  | 0 | 1.105930  | -4.704122 | -0.924182 |
| 22 | 1  | 0 | 1.147779  | -5.378983 | 1.465335  |
| 23 | 1  | 0 | 1.374982  | -3.643901 | 3.226443  |
| 24 | 1  | 0 | 1.547553  | -1.272757 | 2.611504  |
| 25 | 1  | 0 | 3.732021  | -0.022292 | 1.919894  |
| 26 | 1  | 0 | 4.593659  | 1.396001  | 3.733590  |
| 27 | 1  | 0 | 3.470670  | 3.541538  | 4.282501  |
| 28 | 1  | 0 | 0.597745  | 2.825849  | 1.189343  |
| 29 | 1  | 0 | 1.472952  | 4.248302  | 2.990254  |
| 30 | 1  | 0 | 2.306033  | 2.270364  | -2.003558 |
| 31 | 1  | 0 | 4.167079  | 2.550540  | -3.589970 |
| 32 | 1  | 0 | 3.879955  | -1.551100 | -0.833437 |
| 33 | 1  | 0 | 5.738558  | -1.268893 | -2.420258 |
| 34 | 1  | 0 | 5.893846  | 0.779498  | -3.812700 |
| 35 | 14 | 0 | -2.046735 | -0.283617 | 0.173939  |
| 36 | 6  | 0 | -3.220415 | 1.068398  | -0.486995 |
| 37 | 6  | 0 | -1.342590 | 0.280080  | 1.845625  |
| 38 | 6  | 0 | -3.835482 | 0.946882  | -1.750433 |
| 39 | 6  | 0 | -4.675999 | 1.944719  | -2.253523 |
| 40 | 6  | 0 | -4.932161 | 3.085951  | -1.498293 |
| 41 | 6  | 0 | -4.343339 | 3.226492  | -0.240191 |
| 42 | 6  | 0 | -3.496121 | 2.236569  | 0.253063  |
| 43 | 1  | 0 | -2.102296 | 0.260640  | 2.630739  |
| 44 | 1  | 0 | -0.941192 | 1.289042  | 1.775220  |
| 45 | 1  | 0 | -3.663106 | 0.055892  | -2.343429 |
| 46 | 1  | 0 | -5.133703 | 1.822769  | -3.228947 |
| 47 | 1  | 0 | -5.587463 | 3.859208  | -1.882542 |
| 48 | 1  | 0 | -4.547135 | 4.108958  | 0.356441  |
| 49 | 1  | 0 | -3.044353 | 2.370014  | 1.229511  |
| 50 | 1  | 0 | -0.531091 | -0.371122 | 2.170114  |
| 51 | 6  | 0 | -0.072998 | 0.819275  | -0.799912 |
| 52 | 6  | 0 | -0.171265 | 0.251738  | -2.187339 |
| 53 | 6  | 0 | -0.954666 | -0.842149 | -2.281120 |
| 54 | 8  | 0 | -1.637681 | -1.299582 | -1.222624 |
| 55 | 1  | 0 | 0.418389  | 0.561562  | -3.047356 |

|    |   |   |           |           |           |
|----|---|---|-----------|-----------|-----------|
| 56 | 1 | 0 | -1.077628 | -1.434214 | -3.184307 |
| 57 | 3 | 0 | -1.602629 | 1.820760  | -1.786398 |
| 58 | 1 | 0 | 0.015504  | 1.923350  | -0.773899 |
| 59 | 6 | 0 | -3.275075 | -1.695462 | 0.798935  |
| 60 | 6 | 0 | -4.221439 | -1.180552 | 1.899401  |
| 61 | 6 | 0 | -2.425941 | -2.846770 | 1.370101  |
| 62 | 6 | 0 | -4.163632 | -2.253733 | -0.326406 |
| 63 | 1 | 0 | -4.958846 | -1.954175 | 2.154273  |
| 64 | 1 | 0 | -4.780242 | -0.295345 | 1.576540  |
| 65 | 1 | 0 | -3.697703 | -0.926045 | 2.823124  |
| 66 | 1 | 0 | -1.749690 | -3.258221 | 0.616207  |
| 67 | 1 | 0 | -1.815368 | -2.521992 | 2.217592  |
| 68 | 1 | 0 | -3.066438 | -3.666937 | 1.726074  |
| 69 | 1 | 0 | -3.570970 | -2.667269 | -1.142700 |
| 70 | 1 | 0 | -4.818188 | -1.481142 | -0.742474 |
| 71 | 1 | 0 | -4.813538 | -3.050608 | 0.063442  |

## TS-2

Zero-point correction= 0.57809 a.u.

Thermal correction to Gibbs Free Energy= 0.54252 a.u.

Sum of electronic and zero-point Energies= -1902.29660 a.u.

Sum of electronic and thermal Free Energies= -1902.33217 a.u.

The number of imaginary frequencies 1

### Standard orientation

| Center<br>Number | Atomic<br>Number | Atomic<br>Type | Coordinates (Angstroms) |          |           |
|------------------|------------------|----------------|-------------------------|----------|-----------|
|                  |                  |                | X                       | Y        | Z         |
| 1                | 6                | 0              | -0.795872               | 2.099449 | -4.261161 |
| 2                | 6                | 0              | -2.272167               | 2.356924 | -4.395897 |
| 3                | 6                | 0              | -2.656946               | 2.621289 | -5.660703 |
| 4                | 8                | 0              | -1.662069               | 2.771407 | -6.568169 |
| 5                | 1                | 0              | -2.999017               | 2.197220 | -3.608608 |
| 6                | 1                | 0              | -3.678220               | 2.724672 | -6.016202 |
| 7                | 3                | 0              | -1.260478               | 4.162171 | -5.351718 |

|    |    |   |           |           |           |
|----|----|---|-----------|-----------|-----------|
| 8  | 1  | 0 | -0.207834 | 3.037157  | -4.154135 |
| 9  | 14 | 0 | -0.139346 | 1.508729  | -6.188474 |
| 10 | 6  | 0 | 0.130256  | 1.656378  | -8.163517 |
| 11 | 14 | 0 | -0.424185 | 1.297316  | -2.591304 |
| 12 | 6  | 0 | 1.218639  | 0.375212  | -2.460779 |
| 13 | 6  | 0 | -1.823054 | 0.133411  | -2.078688 |
| 14 | 6  | 0 | -0.351180 | 2.673944  | -1.285729 |
| 15 | 6  | 0 | 2.420046  | 1.090677  | -2.323401 |
| 16 | 6  | 0 | 3.647241  | 0.438314  | -2.243449 |
| 17 | 6  | 0 | 3.700045  | -0.954290 | -2.297421 |
| 18 | 6  | 0 | 2.519943  | -1.684116 | -2.418774 |
| 19 | 6  | 0 | 1.294043  | -1.024043 | -2.494192 |
| 20 | 6  | 0 | -2.537972 | 0.341574  | -0.888995 |
| 21 | 6  | 0 | -3.574505 | -0.510734 | -0.509347 |
| 22 | 6  | 0 | -3.918906 | -1.593708 | -1.315232 |
| 23 | 6  | 0 | -2.188106 | -0.962926 | -2.876331 |
| 24 | 6  | 0 | -3.221749 | -1.817746 | -2.501684 |
| 25 | 6  | 0 | -0.993098 | 3.907254  | -1.476204 |
| 26 | 6  | 0 | -0.981481 | 4.893771  | -0.490723 |
| 27 | 6  | 0 | 0.302339  | 2.466329  | -0.059801 |
| 28 | 6  | 0 | 0.319515  | 3.447144  | 0.929587  |
| 29 | 6  | 0 | -0.322677 | 4.665965  | 0.715637  |
| 30 | 1  | 0 | 2.399561  | 2.174527  | -2.279810 |
| 31 | 1  | 0 | 4.560907  | 1.013570  | -2.140813 |
| 32 | 1  | 0 | 4.654235  | -1.466052 | -2.237663 |
| 33 | 1  | 0 | 2.551587  | -2.767724 | -2.452837 |
| 34 | 1  | 0 | 0.389162  | -1.611862 | -2.584351 |
| 35 | 1  | 0 | -2.286796 | 1.179818  | -0.249185 |
| 36 | 1  | 0 | -4.112491 | -0.328024 | 0.414712  |
| 37 | 1  | 0 | -4.725157 | -2.257253 | -1.022229 |
| 38 | 1  | 0 | -1.667088 | -1.150618 | -3.803866 |
| 39 | 1  | 0 | -3.482540 | -2.655797 | -3.138618 |
| 40 | 1  | 0 | -1.522698 | 4.103174  | -2.402751 |
| 41 | 1  | 0 | -1.487255 | 5.837841  | -0.663179 |
| 42 | 1  | 0 | 0.809467  | 1.525526  | 0.124940  |

|    |   |   |           |           |            |
|----|---|---|-----------|-----------|------------|
| 43 | 1 | 0 | 0.833887  | 3.261373  | 1.866270   |
| 44 | 1 | 0 | -0.310135 | 5.431386  | 1.483659   |
| 45 | 6 | 0 | 1.676653  | 1.822639  | -5.658636  |
| 46 | 1 | 0 | 1.780907  | 2.849062  | -5.287389  |
| 47 | 1 | 0 | 1.938886  | 1.168201  | -4.826880  |
| 48 | 1 | 0 | 2.420177  | 1.686116  | -6.443719  |
| 49 | 6 | 0 | -0.661109 | -0.312577 | -6.073709  |
| 50 | 6 | 0 | 0.255909  | -1.303788 | -5.691826  |
| 51 | 6 | 0 | -1.969589 | -0.726006 | -6.375402  |
| 52 | 6 | 0 | -0.115181 | -2.644983 | -5.601865  |
| 53 | 1 | 0 | 1.276604  | -1.029363 | -5.452032  |
| 54 | 6 | 0 | -2.348033 | -2.065208 | -6.290430  |
| 55 | 1 | 0 | -2.711417 | 0.005225  | -6.674459  |
| 56 | 6 | 0 | -1.421147 | -3.030812 | -5.900112  |
| 57 | 1 | 0 | 0.614653  | -3.387161 | -5.295787  |
| 58 | 1 | 0 | -3.367627 | -2.354353 | -6.522320  |
| 59 | 1 | 0 | -1.713652 | -4.072666 | -5.829347  |
| 60 | 6 | 0 | -1.133616 | 1.375191  | -8.994376  |
| 61 | 1 | 0 | -0.904216 | 1.444774  | -10.068122 |
| 62 | 1 | 0 | -1.515639 | 0.366169  | -8.814716  |
| 63 | 1 | 0 | -1.930590 | 2.083336  | -8.769364  |
| 64 | 6 | 0 | 0.630993  | 3.070109  | -8.509873  |
| 65 | 1 | 0 | 0.841309  | 3.158821  | -9.585858  |
| 66 | 1 | 0 | -0.119113 | 3.827356  | -8.262951  |
| 67 | 1 | 0 | 1.555797  | 3.323467  | -7.981470  |
| 68 | 6 | 0 | 1.185235  | 0.631696  | -8.624573  |
| 69 | 1 | 0 | 0.862289  | -0.394520 | -8.426467  |
| 70 | 1 | 0 | 1.342552  | 0.718652  | -9.709062  |
| 71 | 1 | 0 | 2.159115  | 0.768126  | -8.150480  |

---

WY-5-45-2A H1 CDCl3 600M Hz

7.587  
7.576  
7.413  
7.394  
7.382  
7.371  
7.260

6.152  
6.146  
6.139  
6.121  
6.115  
6.108  
6.015  
5.984

4.284  
4.256  
4.238  
4.207

—0.971

—0.393

—0.098

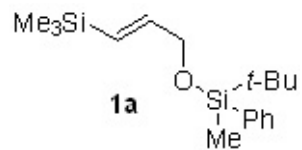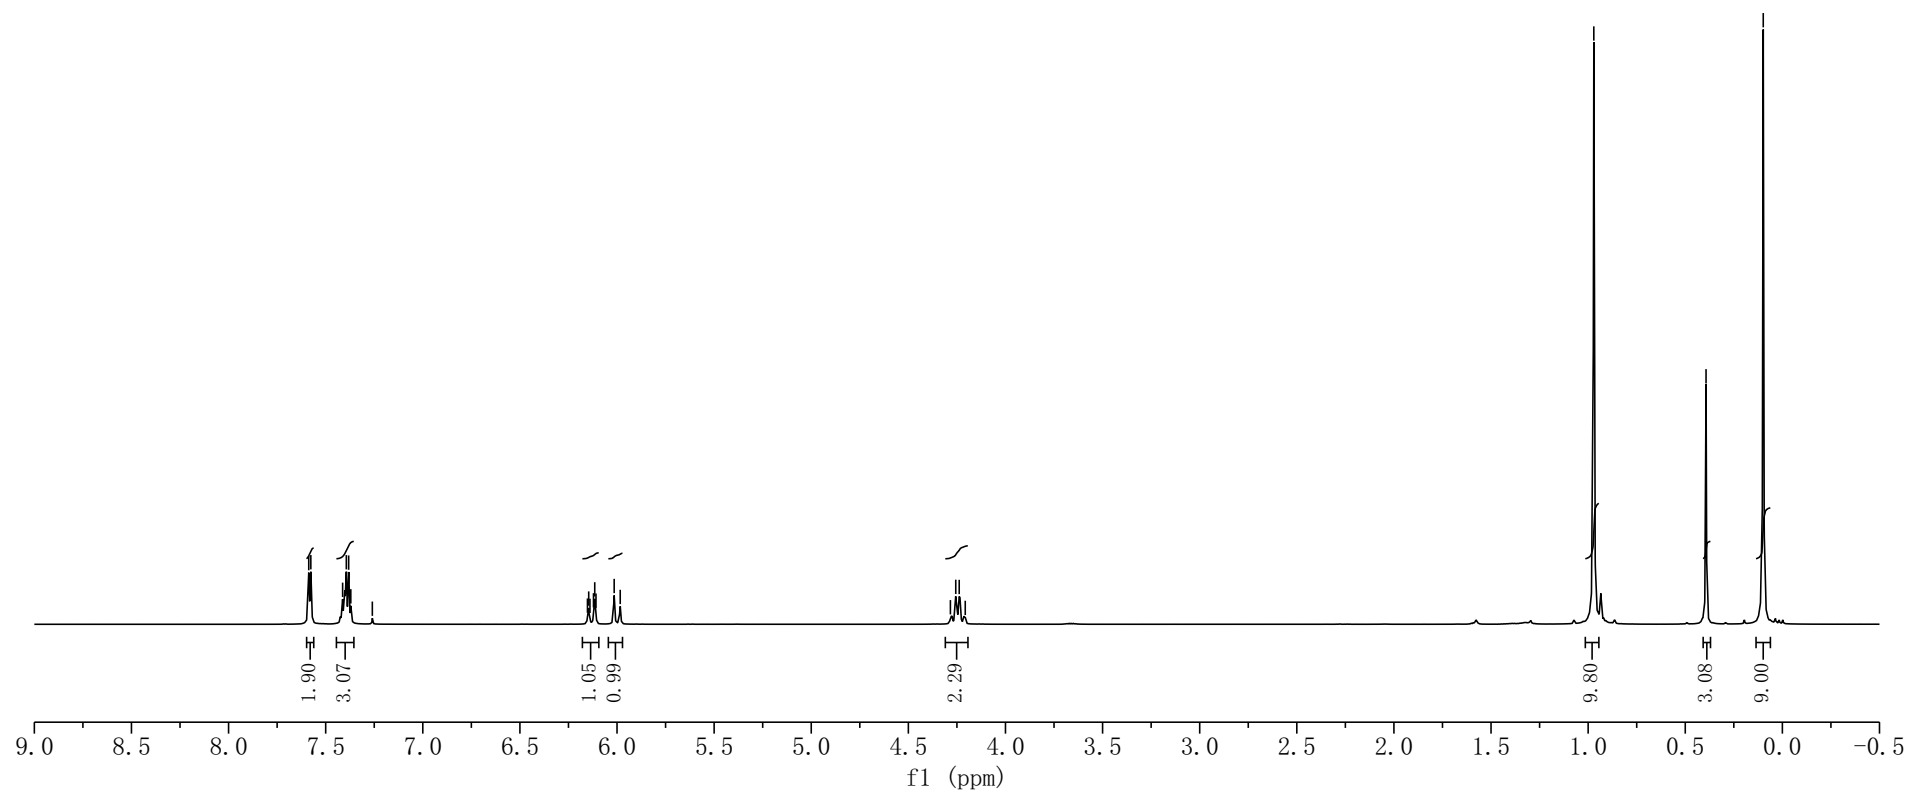

WY-5-45-2A C13 CDCl3 150M Hz

— 144.840  
— 135.826  
— 134.486  
— 129.322  
— 128.227  
— 127.504

77.212 cdcl3  
77.000 cdcl3  
76.788 cdcl3

— 65.765

— 25.960

— 18.412

— -1.295

— -7.137

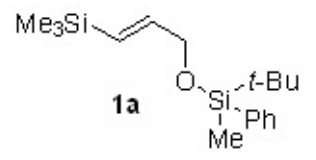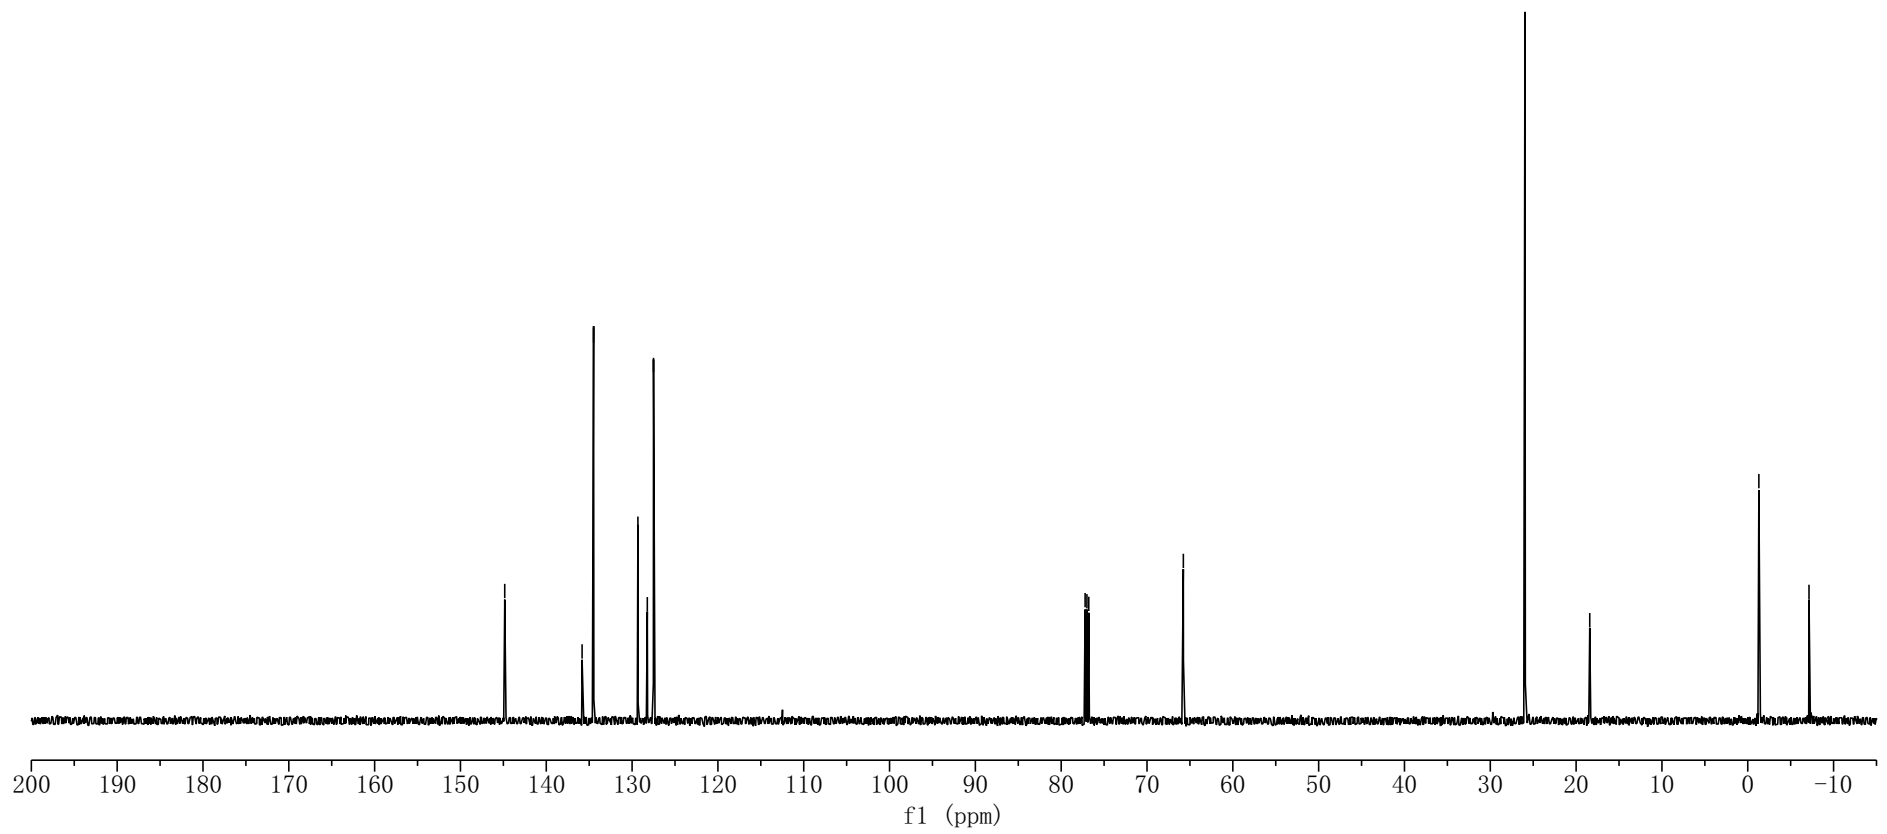



WY-6-2 H1 CDCl3 400M

7.568  
7.550  
7.531  
7.401  
7.374  
7.361  
7.260

6.226  
6.178  
6.159  
6.111

4.302  
4.260  
4.221

0.947

0.375  
0.352

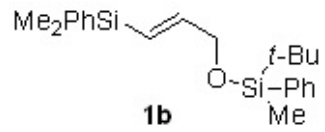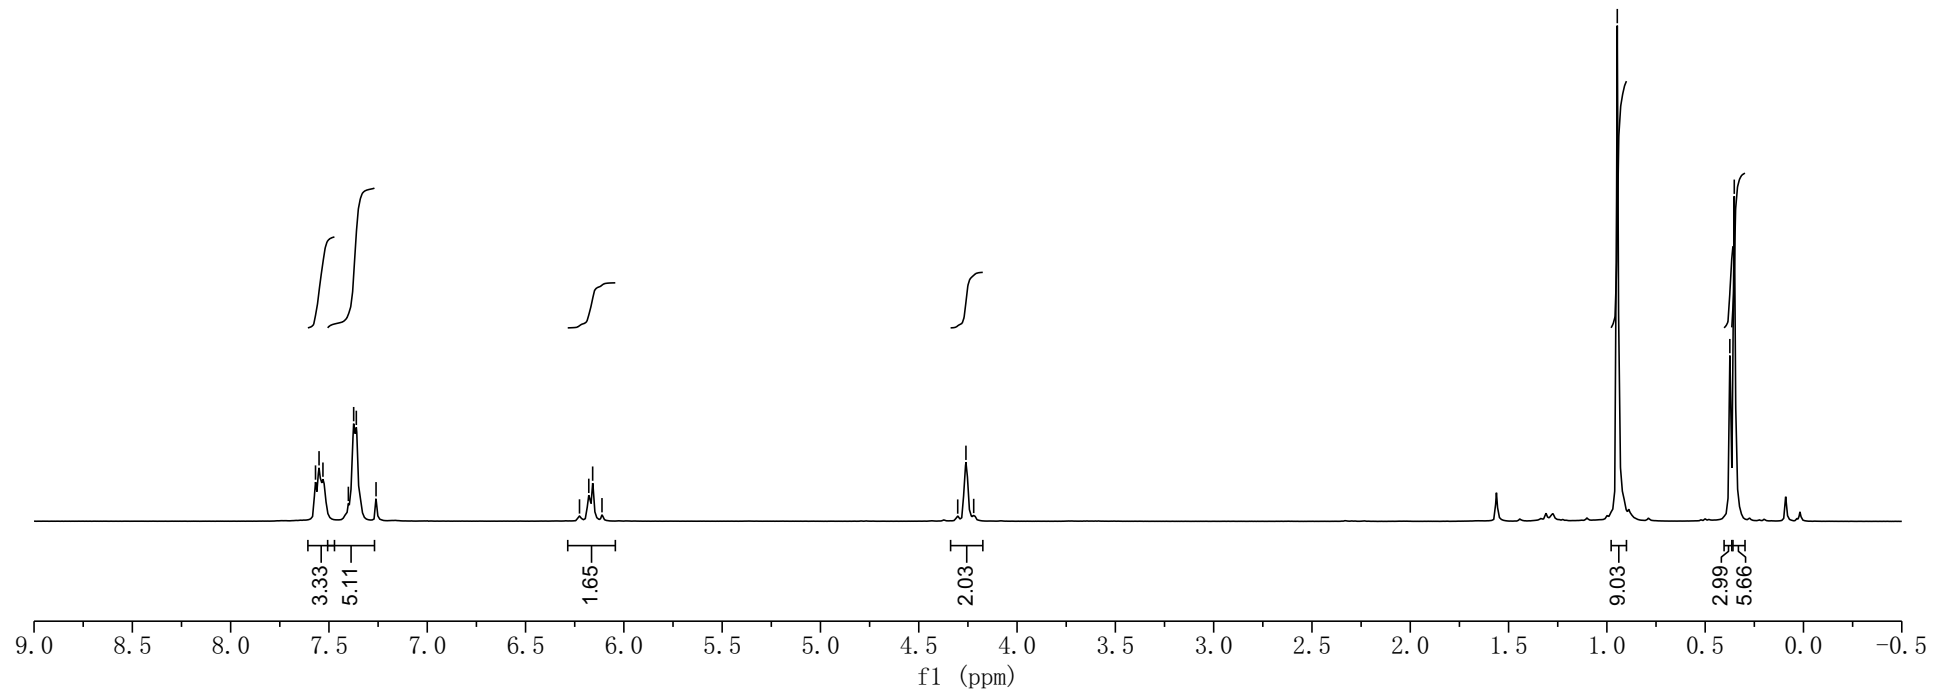

# WY-6-2 C13 CDCI3

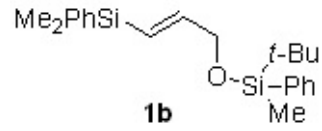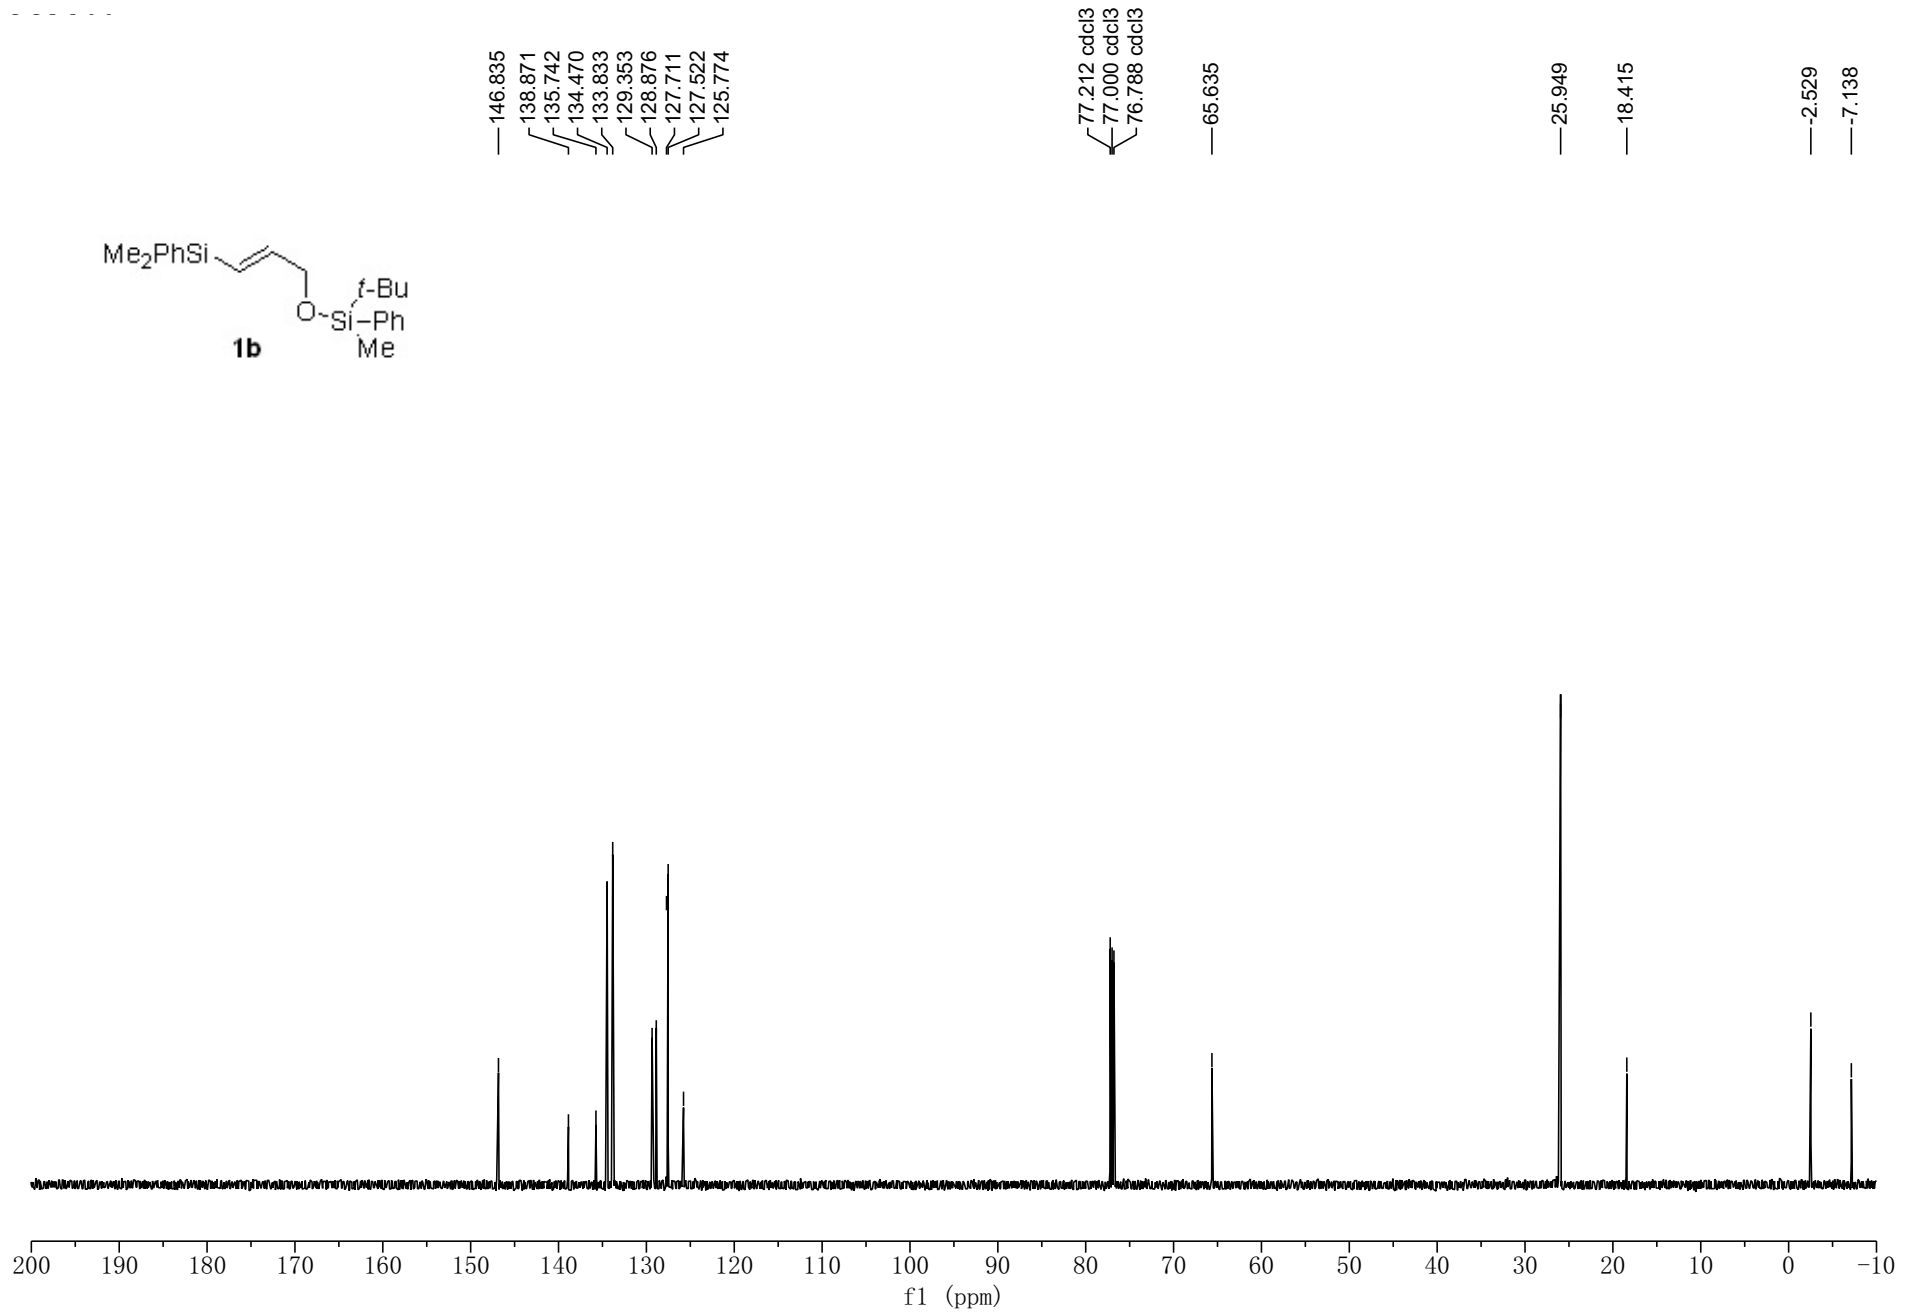

WY-6-86 H1 CDCl3 400M Hz

7.556  
7.540  
7.387  
7.366  
7.349  
7.333  
7.260

6.151  
6.142  
6.133  
6.104  
6.095  
6.086  
5.938  
5.891

4.272  
4.225  
4.185

0.951  
0.930  
0.912  
0.594  
0.574  
0.554  
0.535  
0.355

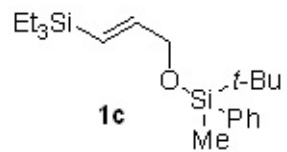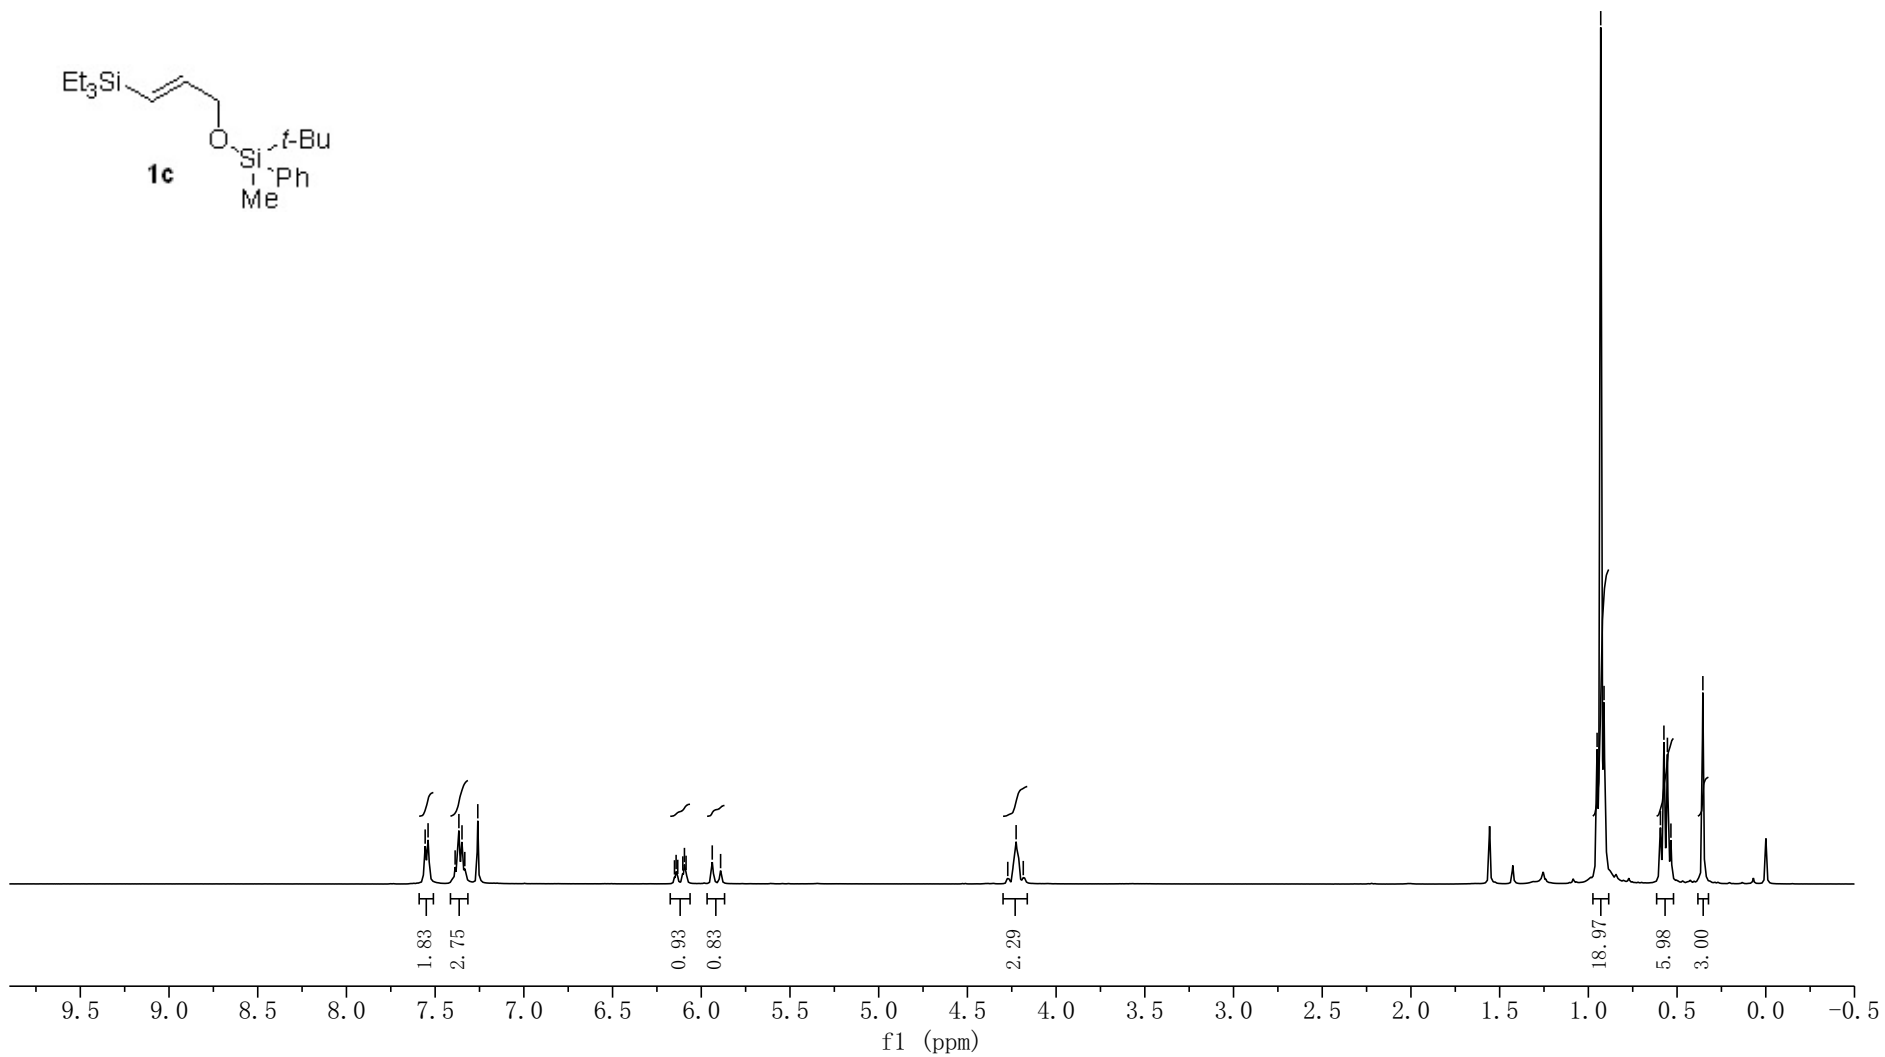

WY-6-86 C13 CDC13 100M Hz

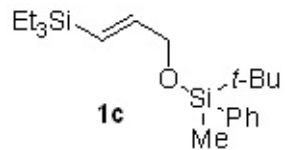

— 146.086

— 135.859

— 134.466

— 129.310

— 127.491

— 124.324

77.314 CDCL3

77.000 CDCL3

76.679 CDCL3

— 65.887

— 25.916

— 18.397

— 7.347

— 4.319

— 7.120

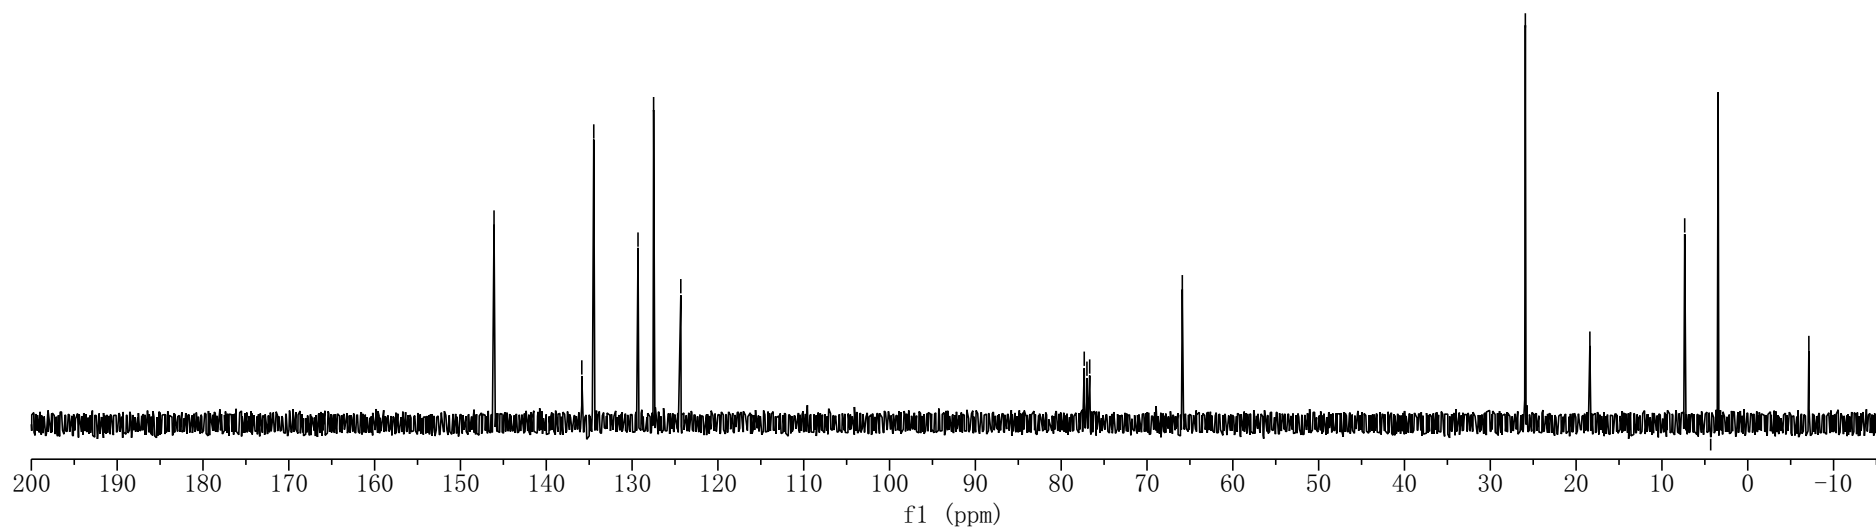

WV-6-27 H1 CDCl3 400M H7

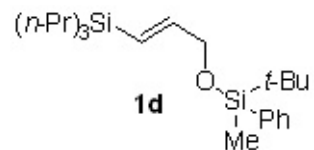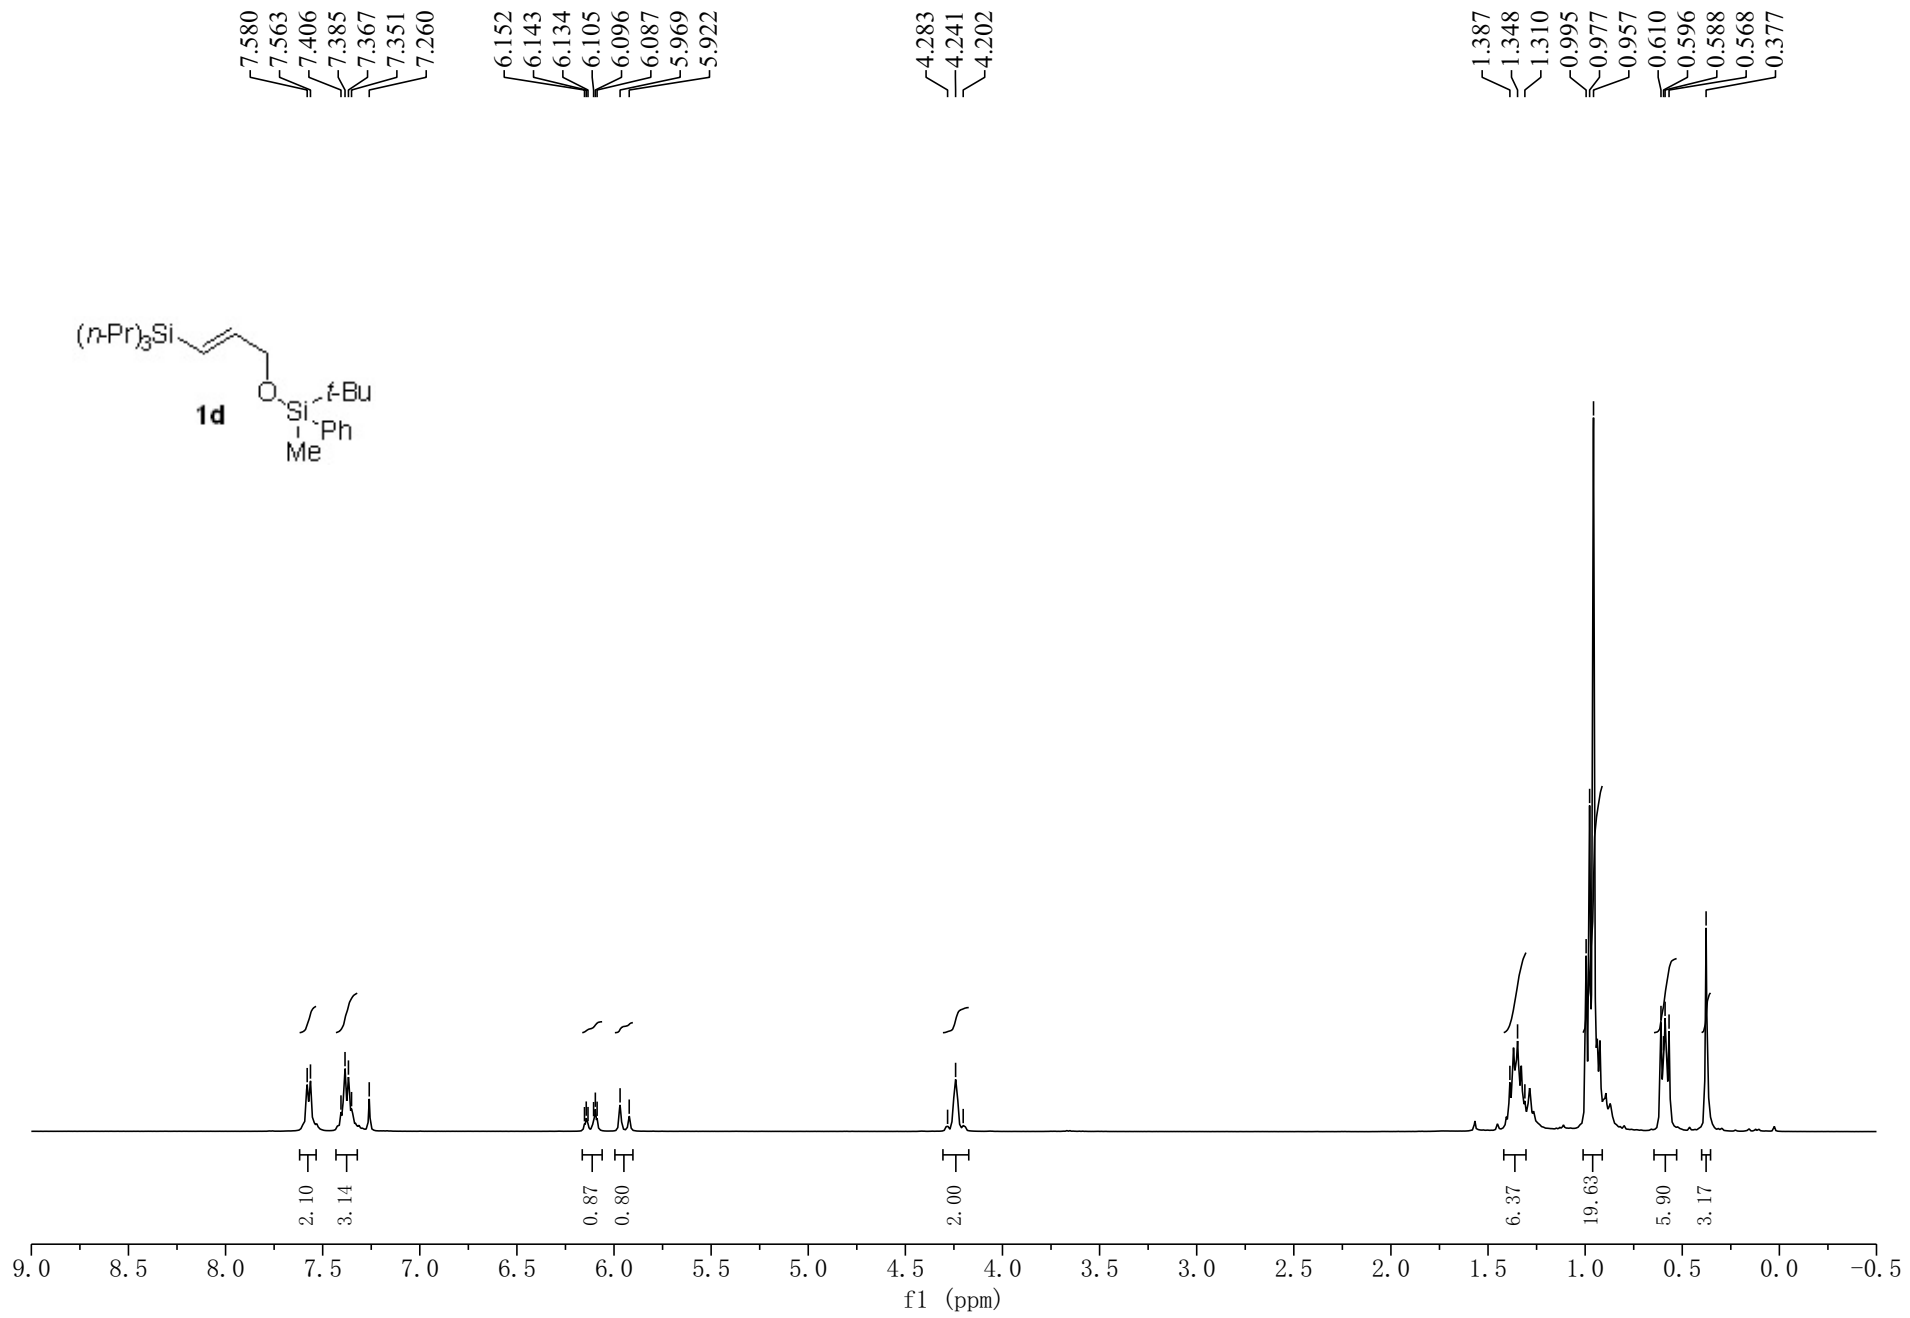

WY-6-27 C13 CDCL3 150M Hz

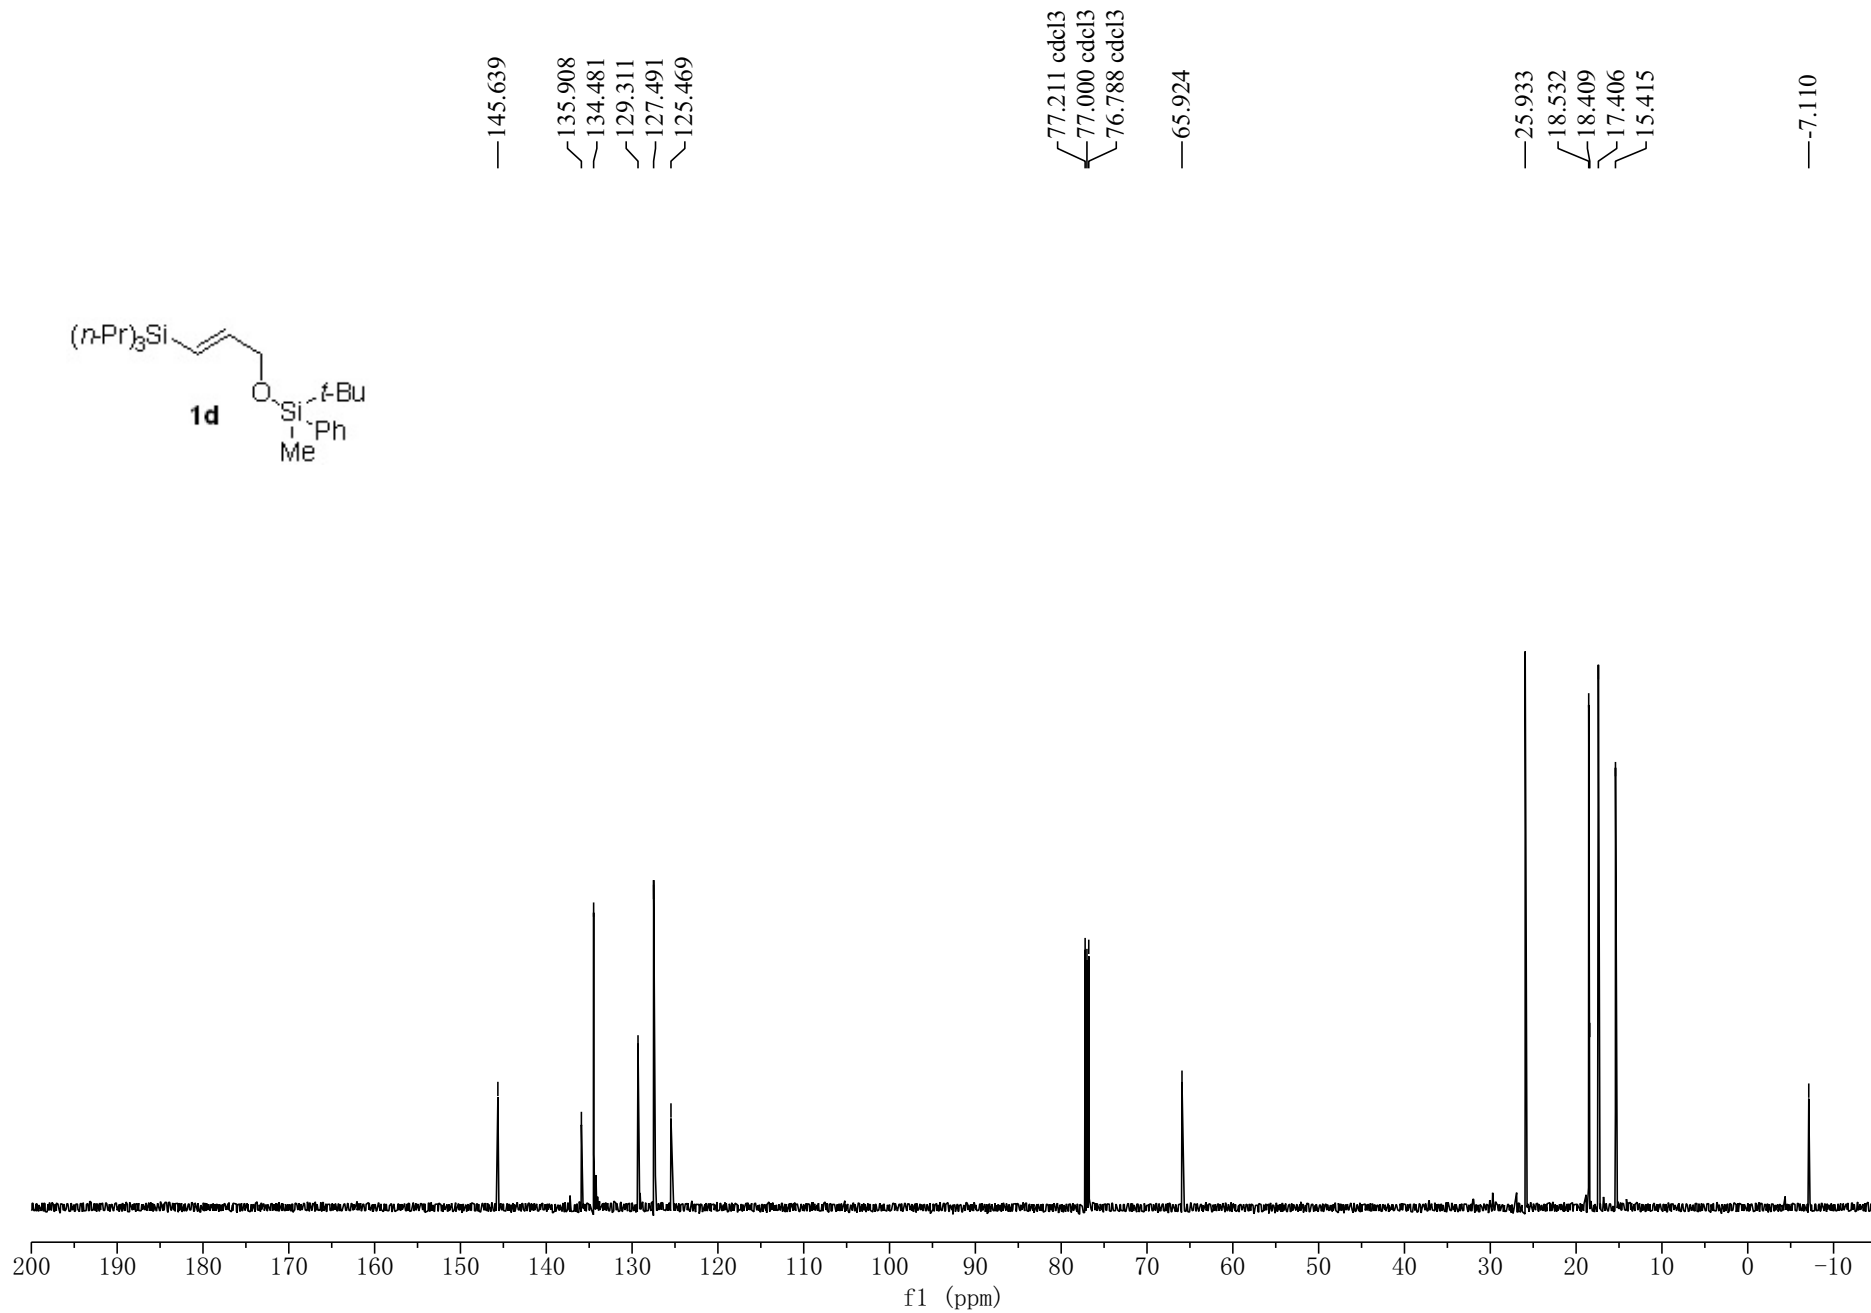

WY-6-28 H1 CDCL3 400M Hz

7.582  
7.565  
7.400  
7.379  
7.361  
7.345

6.220  
6.212  
6.203  
6.173  
6.164  
6.155  
5.950  
5.902

4.314  
4.270  
4.226

1.066  
1.053  
0.954

— 0.380

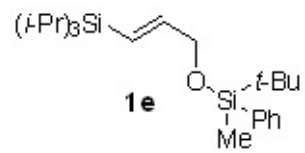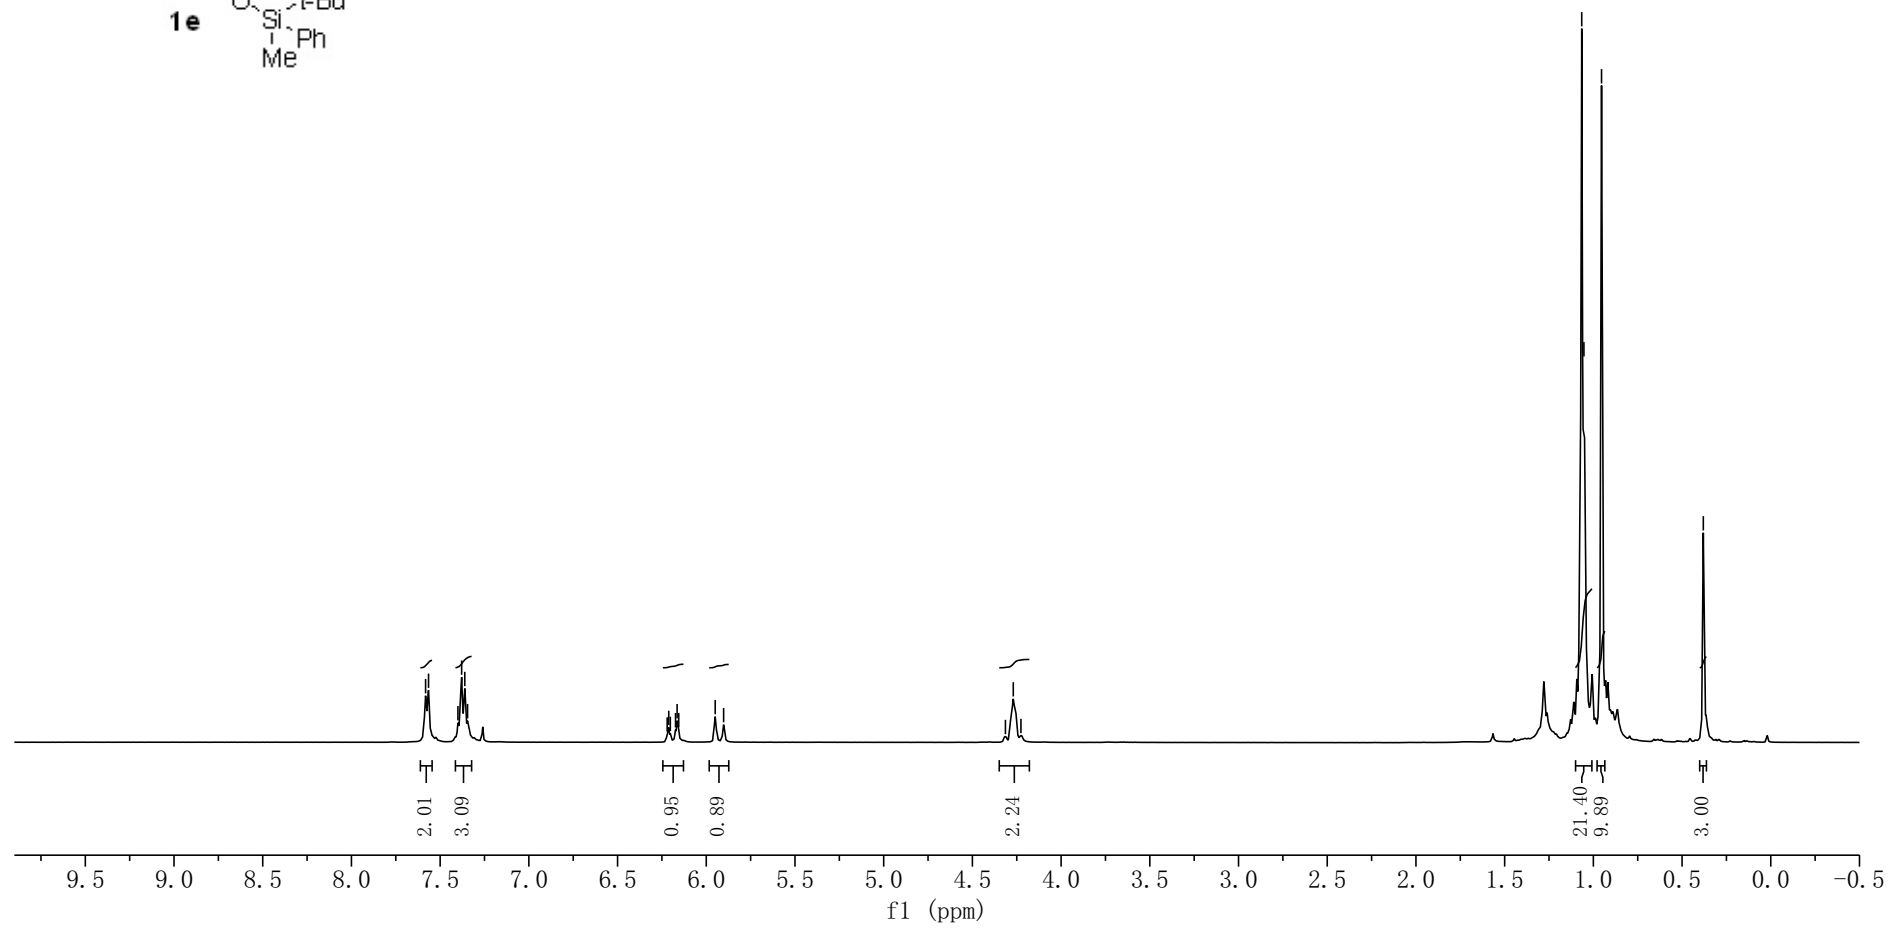

WY-6-28 C13 CDCI3

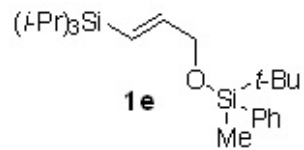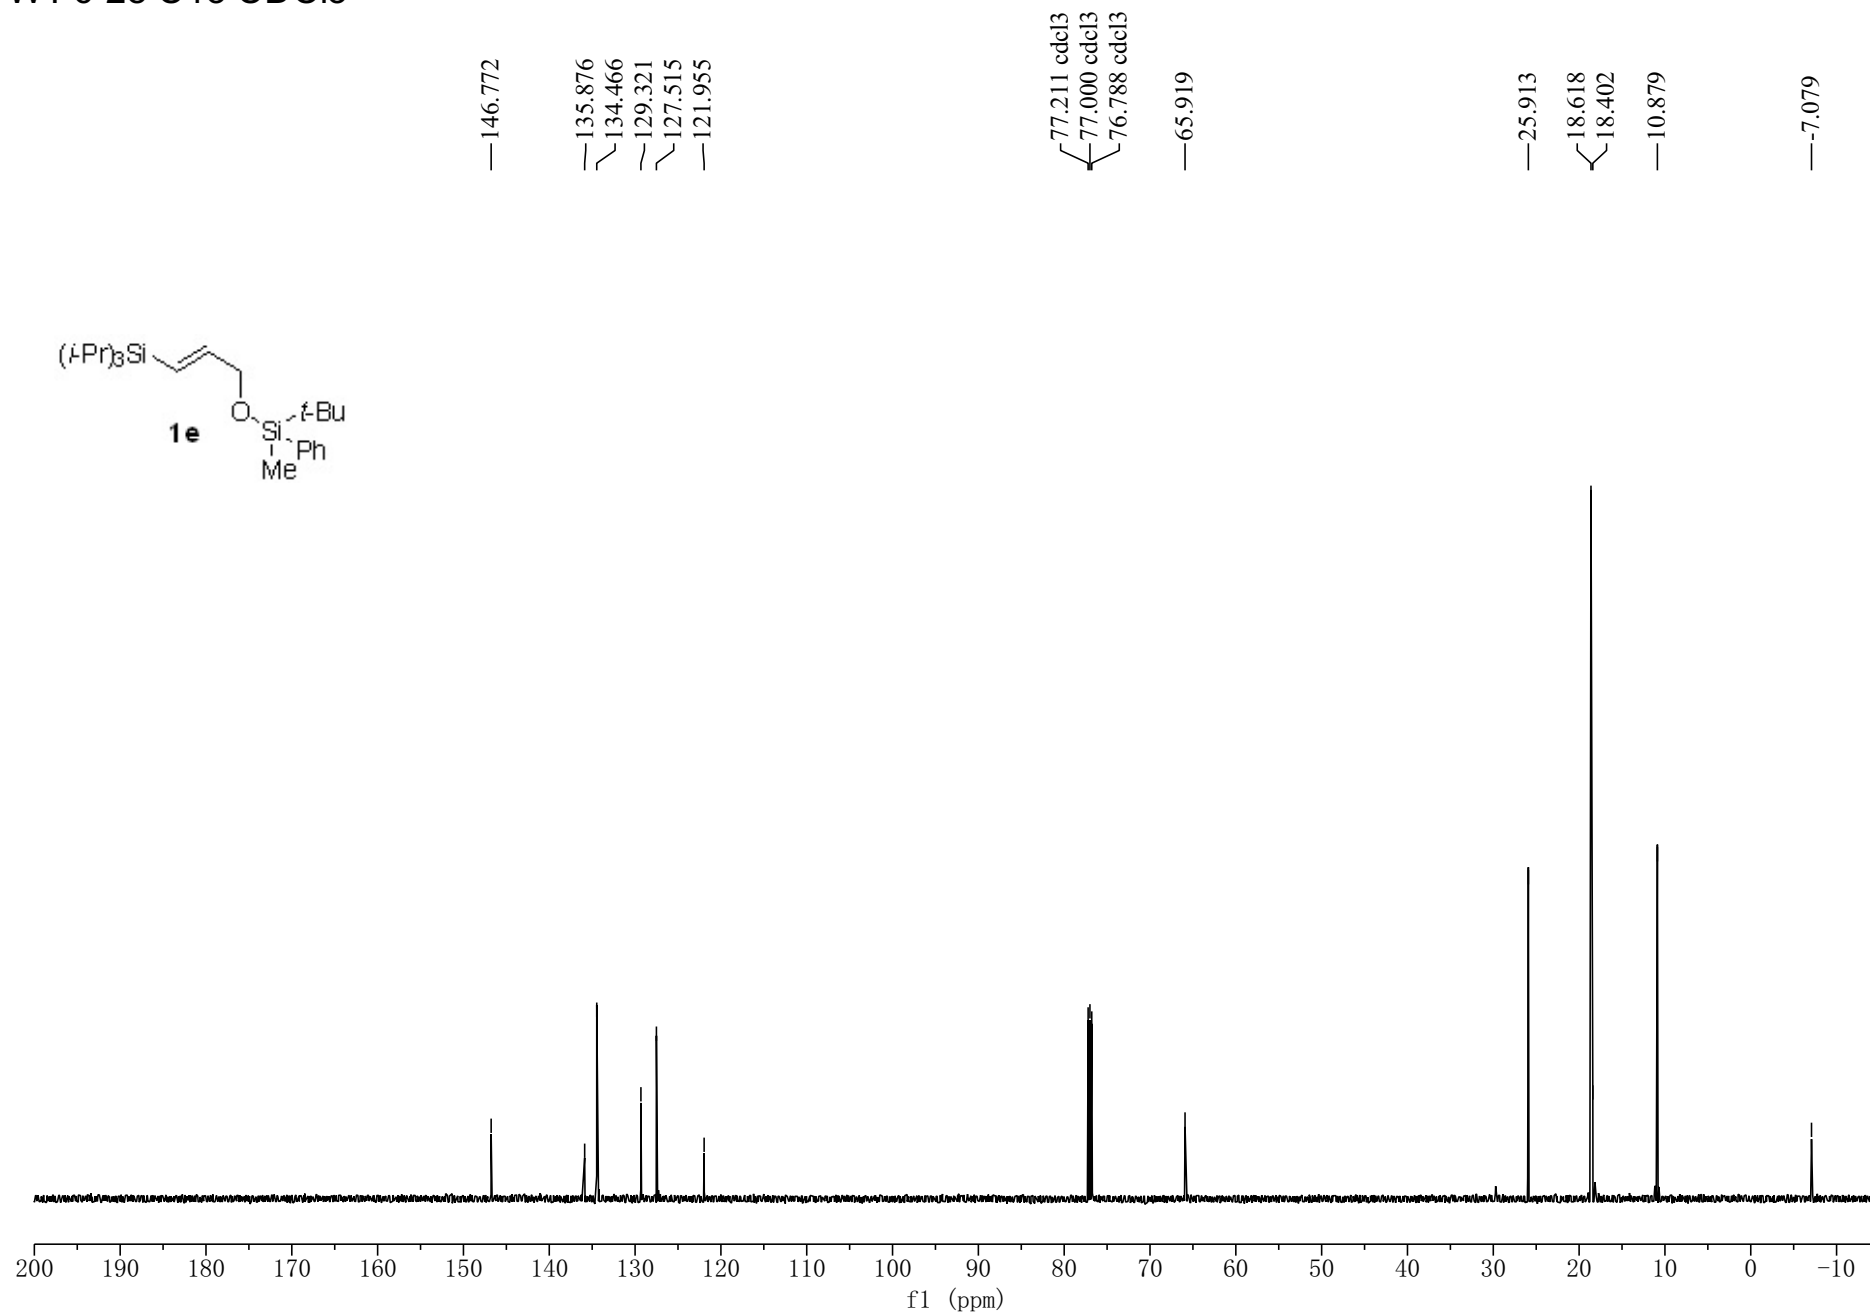



WY-5-66 H1 CDCB 400M Hz

7.585  
7.567  
7.552  
7.535  
7.449  
7.431  
7.379  
7.339  
7.260  
6.666  
6.620  
6.278  
6.270  
6.262  
6.232  
6.224  
6.216

4.370  
4.328  
4.287

—0.966

—0.390

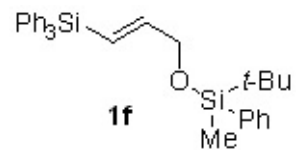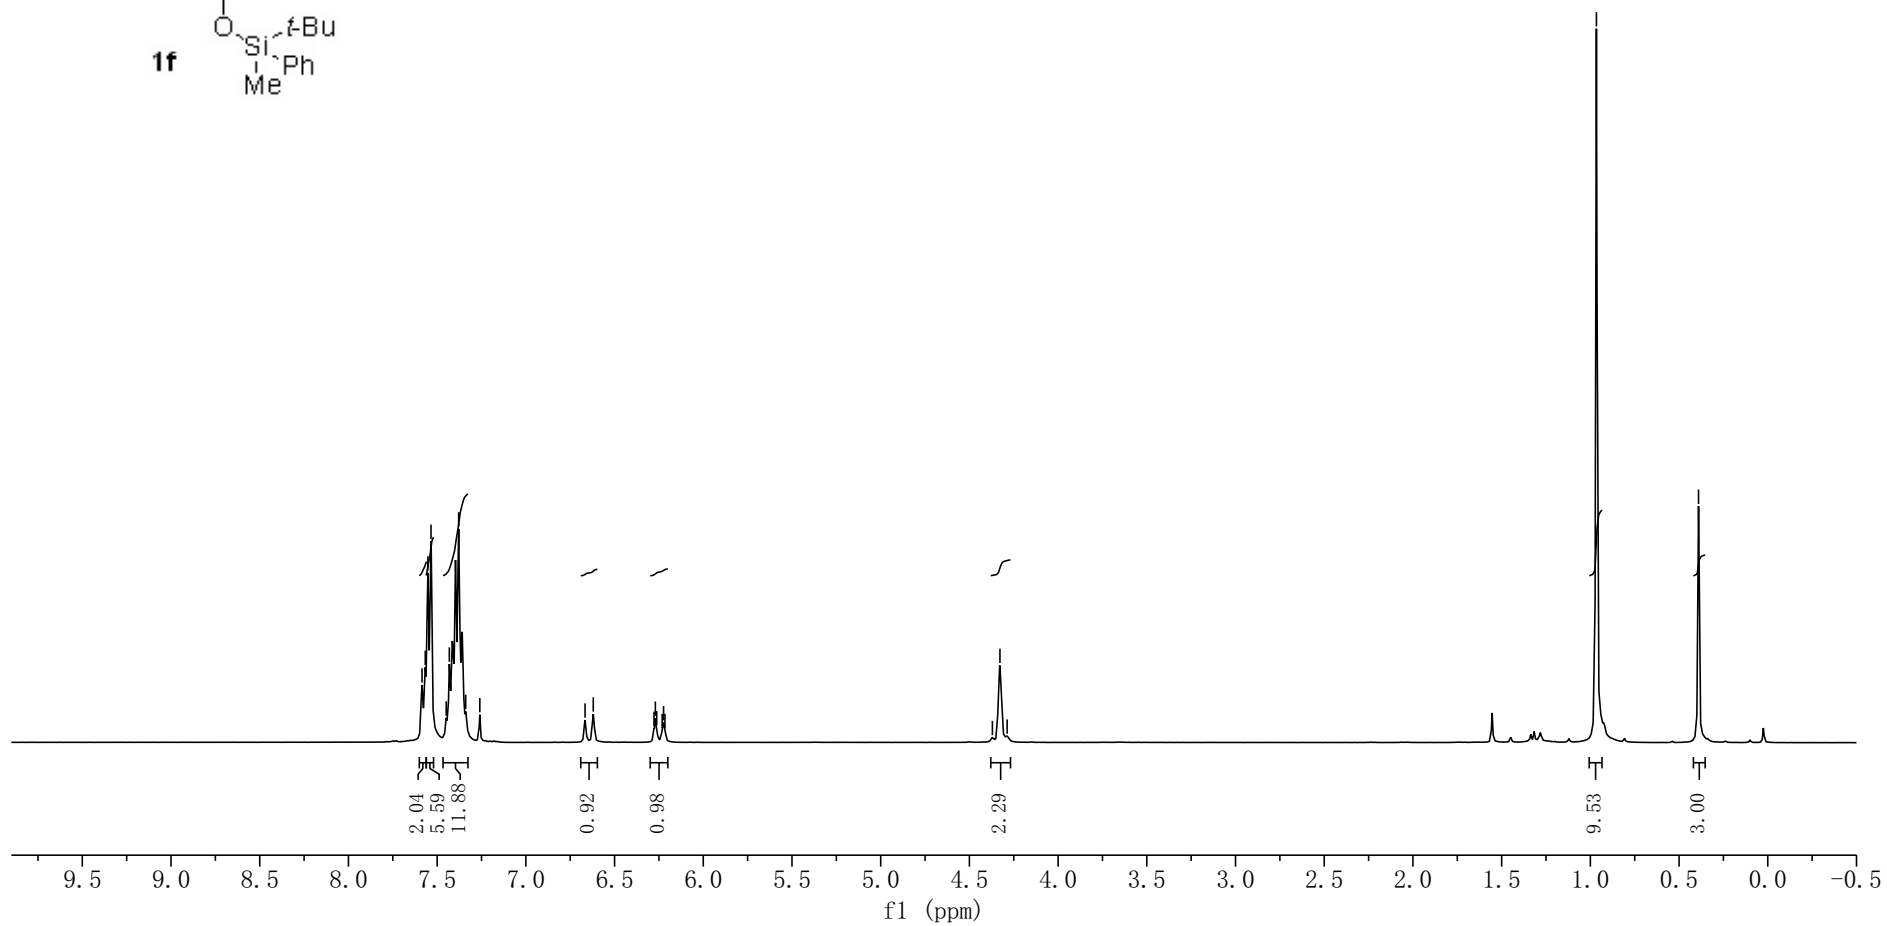

WY-5-66 C13 CDC13 150M Hz

—150.784  
135.918  
135.626  
134.707  
134.448  
129.435  
129.392  
127.797  
127.557  
121.391  
77.212 cdcl3  
77.000 cdcl3  
76.788 cdcl3  
—65.403  
—25.937  
—18.446  
—7.141

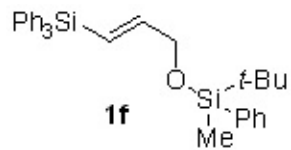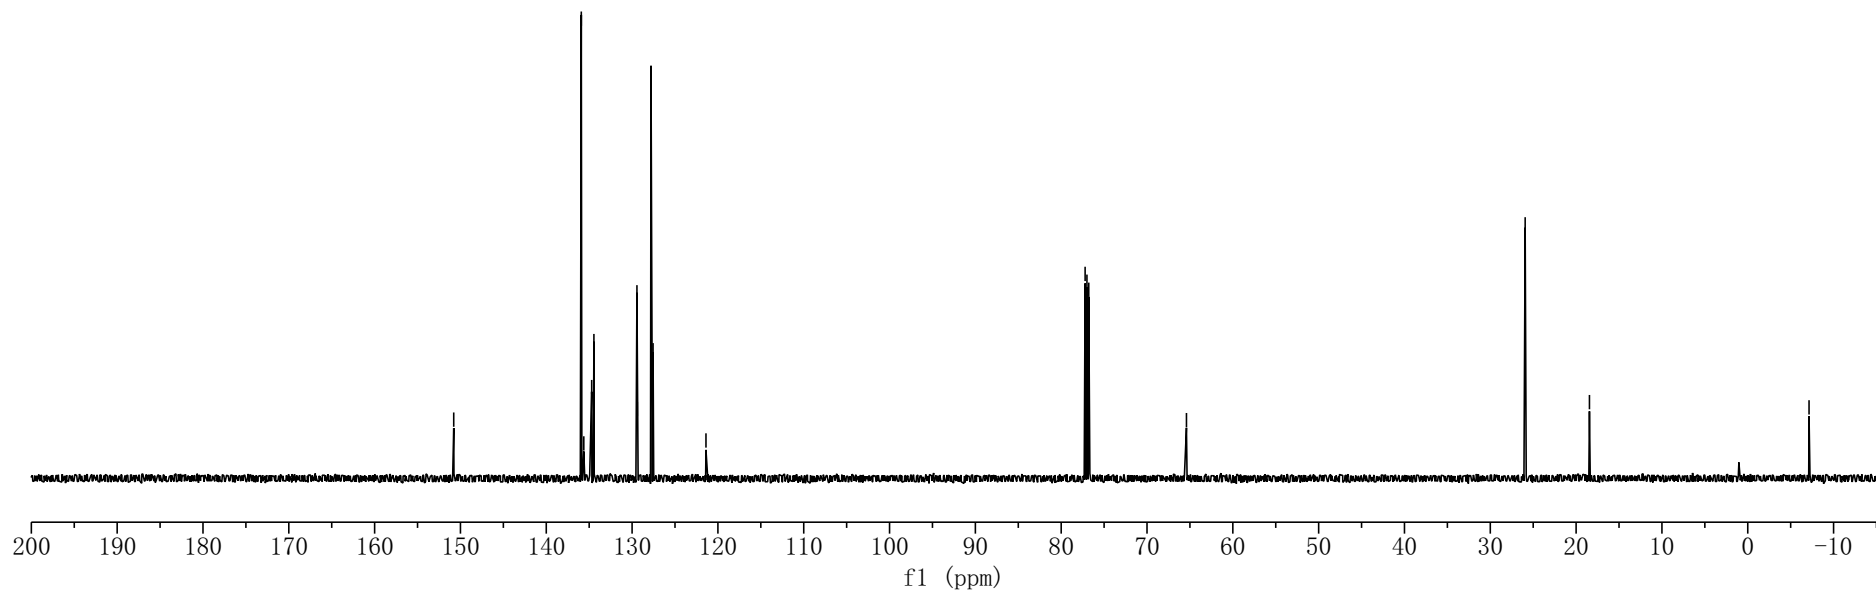

WY-6-63 H1 CDB 400M Hz

8.227  
8.206  
7.951  
7.931  
7.867  
7.831  
7.815  
7.658  
7.641  
7.528  
7.511  
7.443  
7.392  
7.374  
7.358  
7.338  
7.319  
6.283  
6.274  
6.246  
6.237  
6.228

4.430  
4.426

0.834

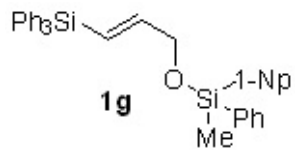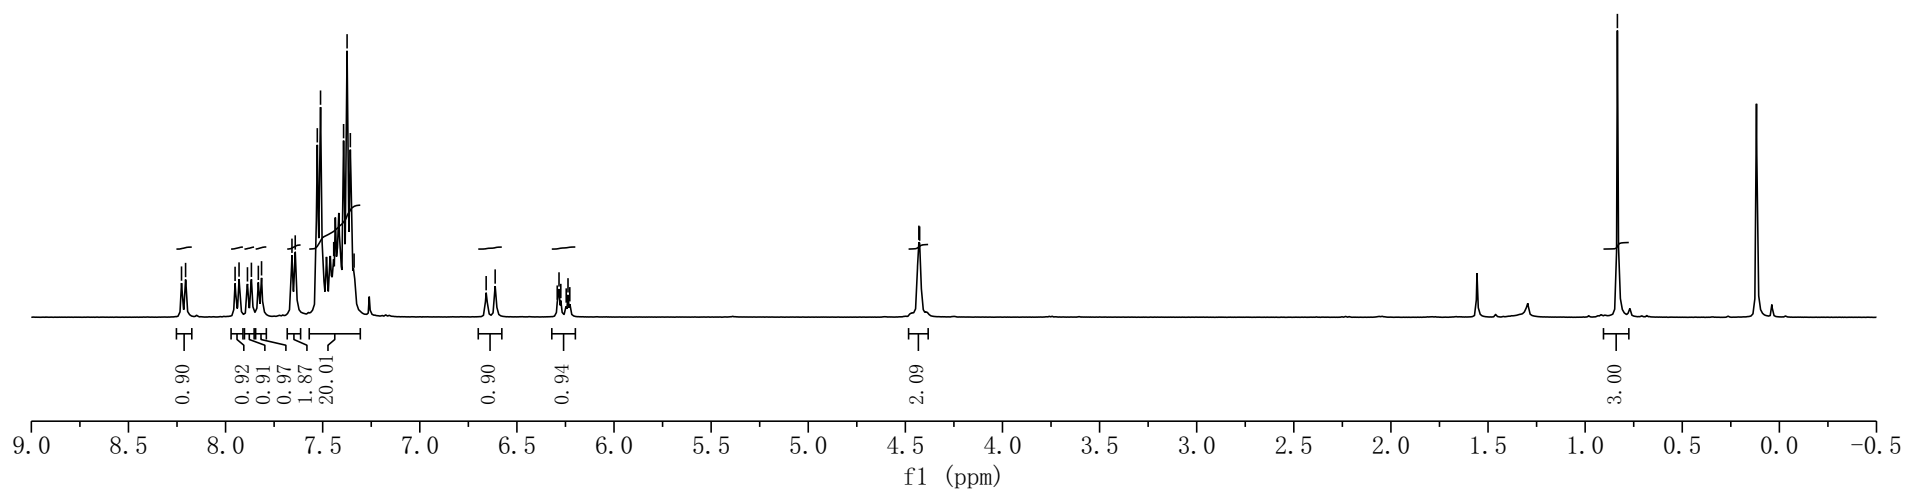

WY-6-63 C13 CDB 100M Hz

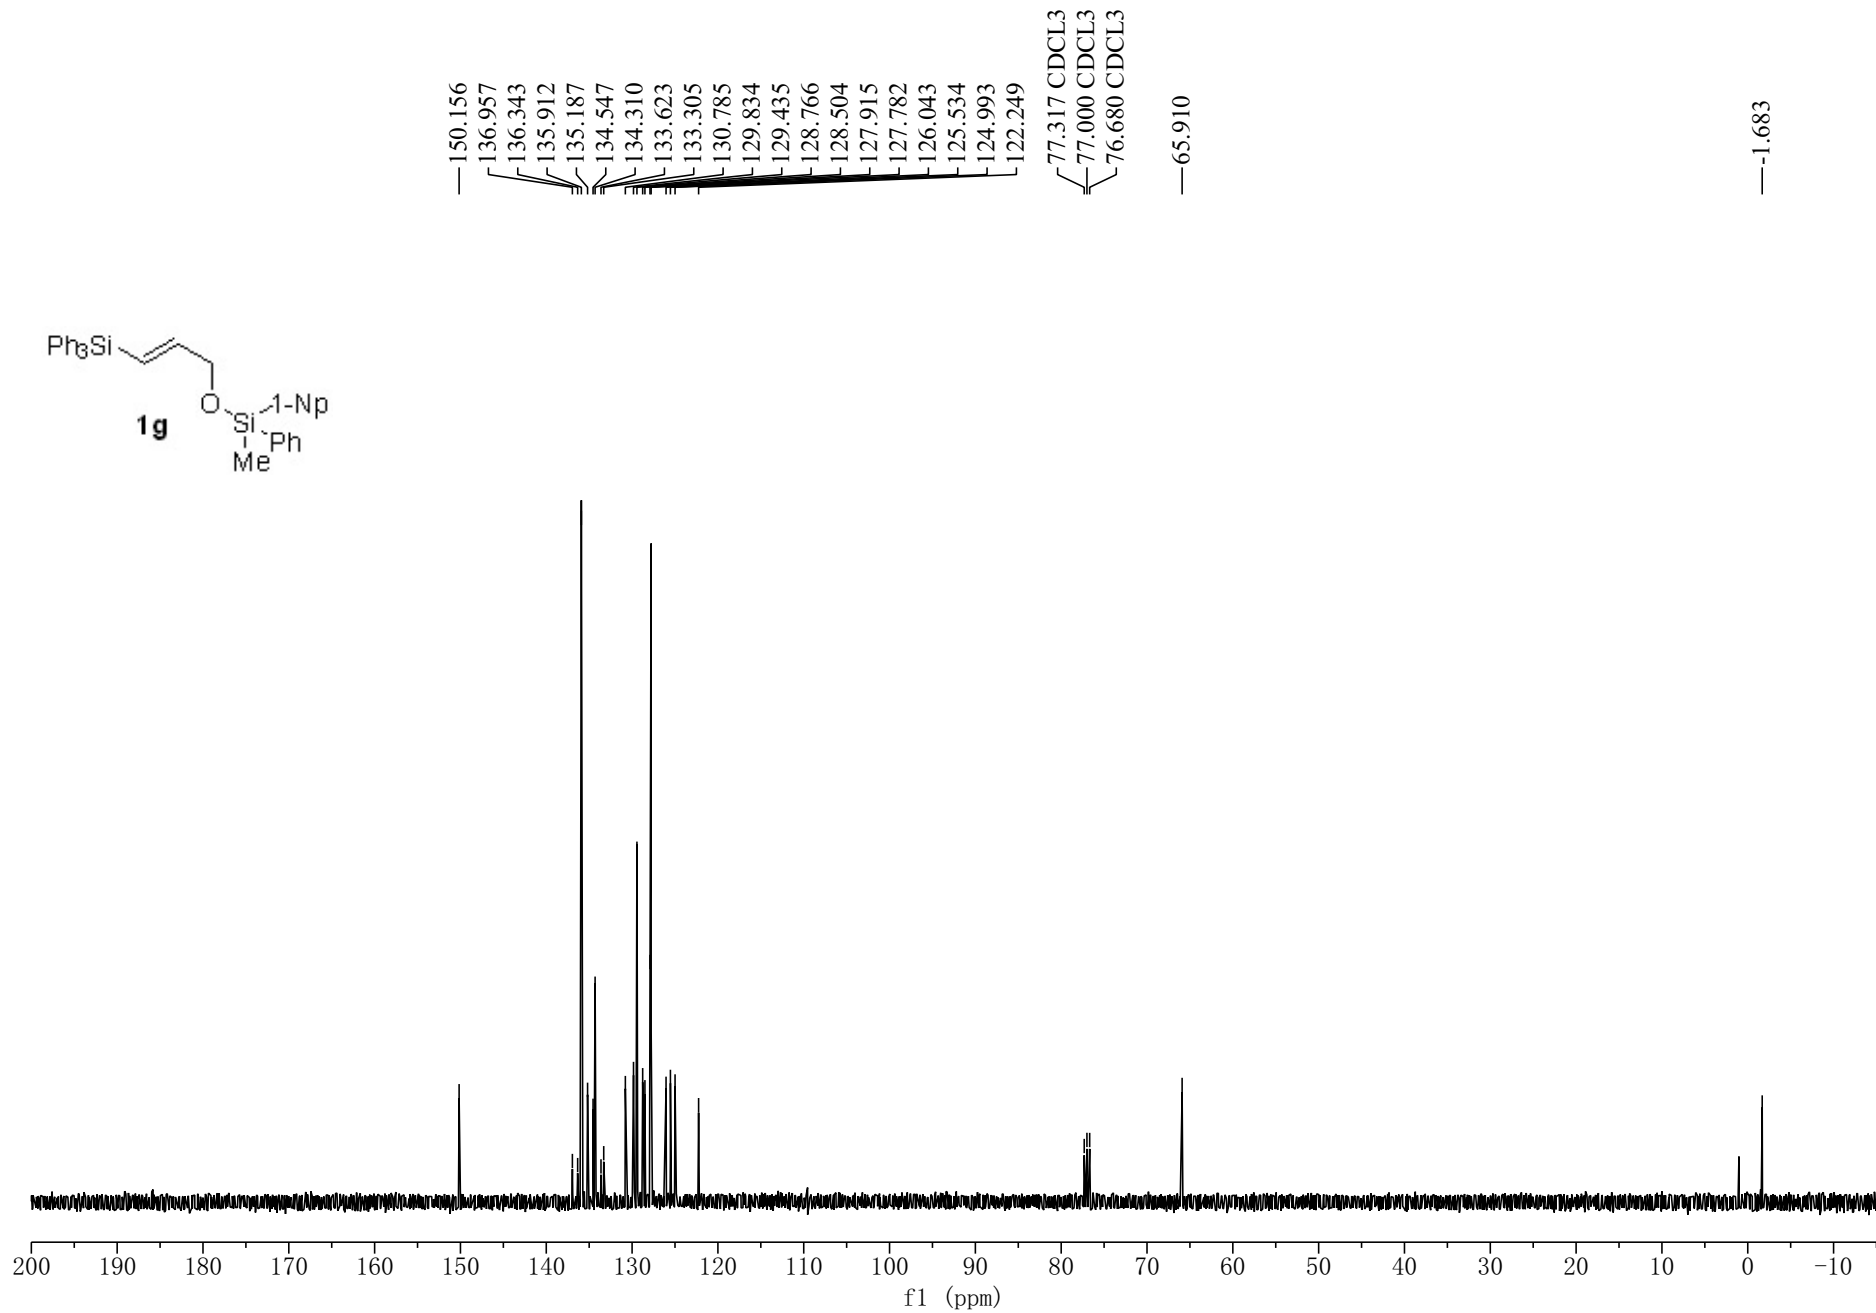

WY-6-75-2 H1 CDC13 400M Hz

8.263  
8.242  
7.968  
7.948  
7.905  
7.885  
7.856  
7.840  
7.688  
7.671  
7.529  
7.511  
7.493  
7.475  
7.458  
7.424  
7.413  
7.378  
7.260  
6.219  
6.208  
6.198  
6.172  
6.161  
6.151  
5.976  
5.929

4.376  
4.372  
4.366

0.984  
0.964  
0.945  
0.854  
0.620  
0.601  
0.581  
0.561

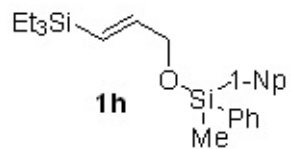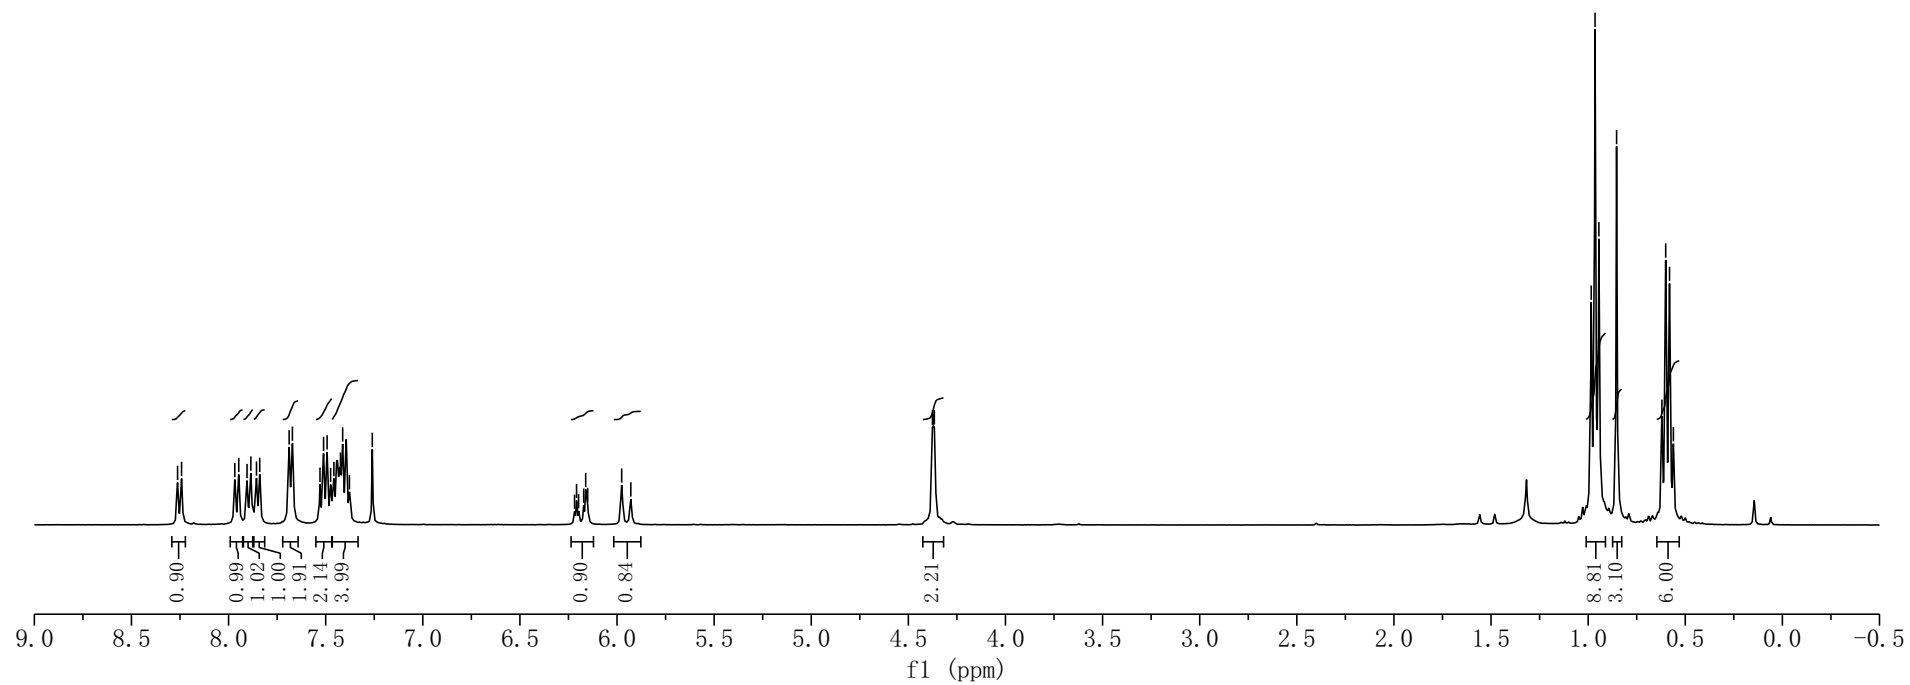

WY-6-73 C13 CDCI3 100M Hz

145.548  
136.994  
136.519  
135.157  
134.320  
133.822  
133.329  
130.727  
129.778  
128.745  
128.593  
127.872  
125.957  
125.506  
125.403  
124.978  
  
77.318 CDCL3  
77.000 CDCL3  
76.682 CDCL3  
  
66.479  
  
7.340  
3.370  
-1.654

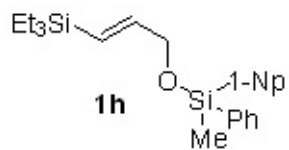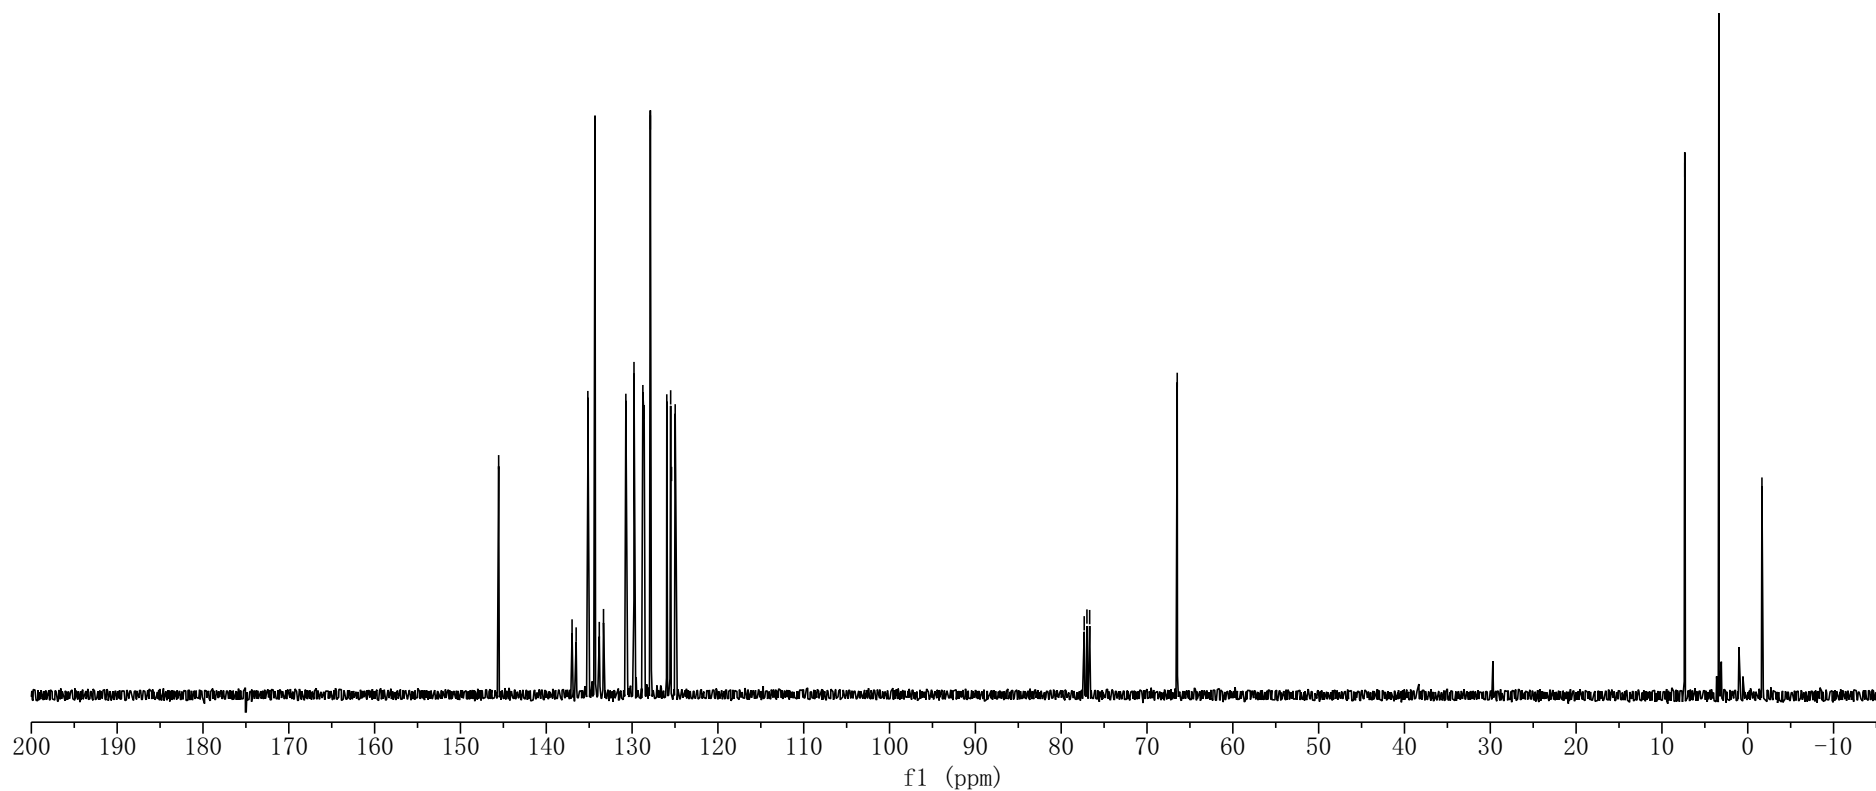

WY-6-75-1 H1 CDCl3 400M Hz

8.244  
8.224  
7.966  
7.946  
7.902  
7.882  
7.854  
7.838  
7.679  
7.662  
7.530  
7.511  
7.492  
7.472  
7.455  
7.391  
7.374  
7.260  
6.176  
6.167  
6.157  
6.130  
6.120  
6.110  
6.014  
5.968

4.343  
4.339

—0.846

—0.077

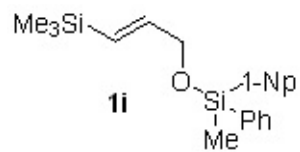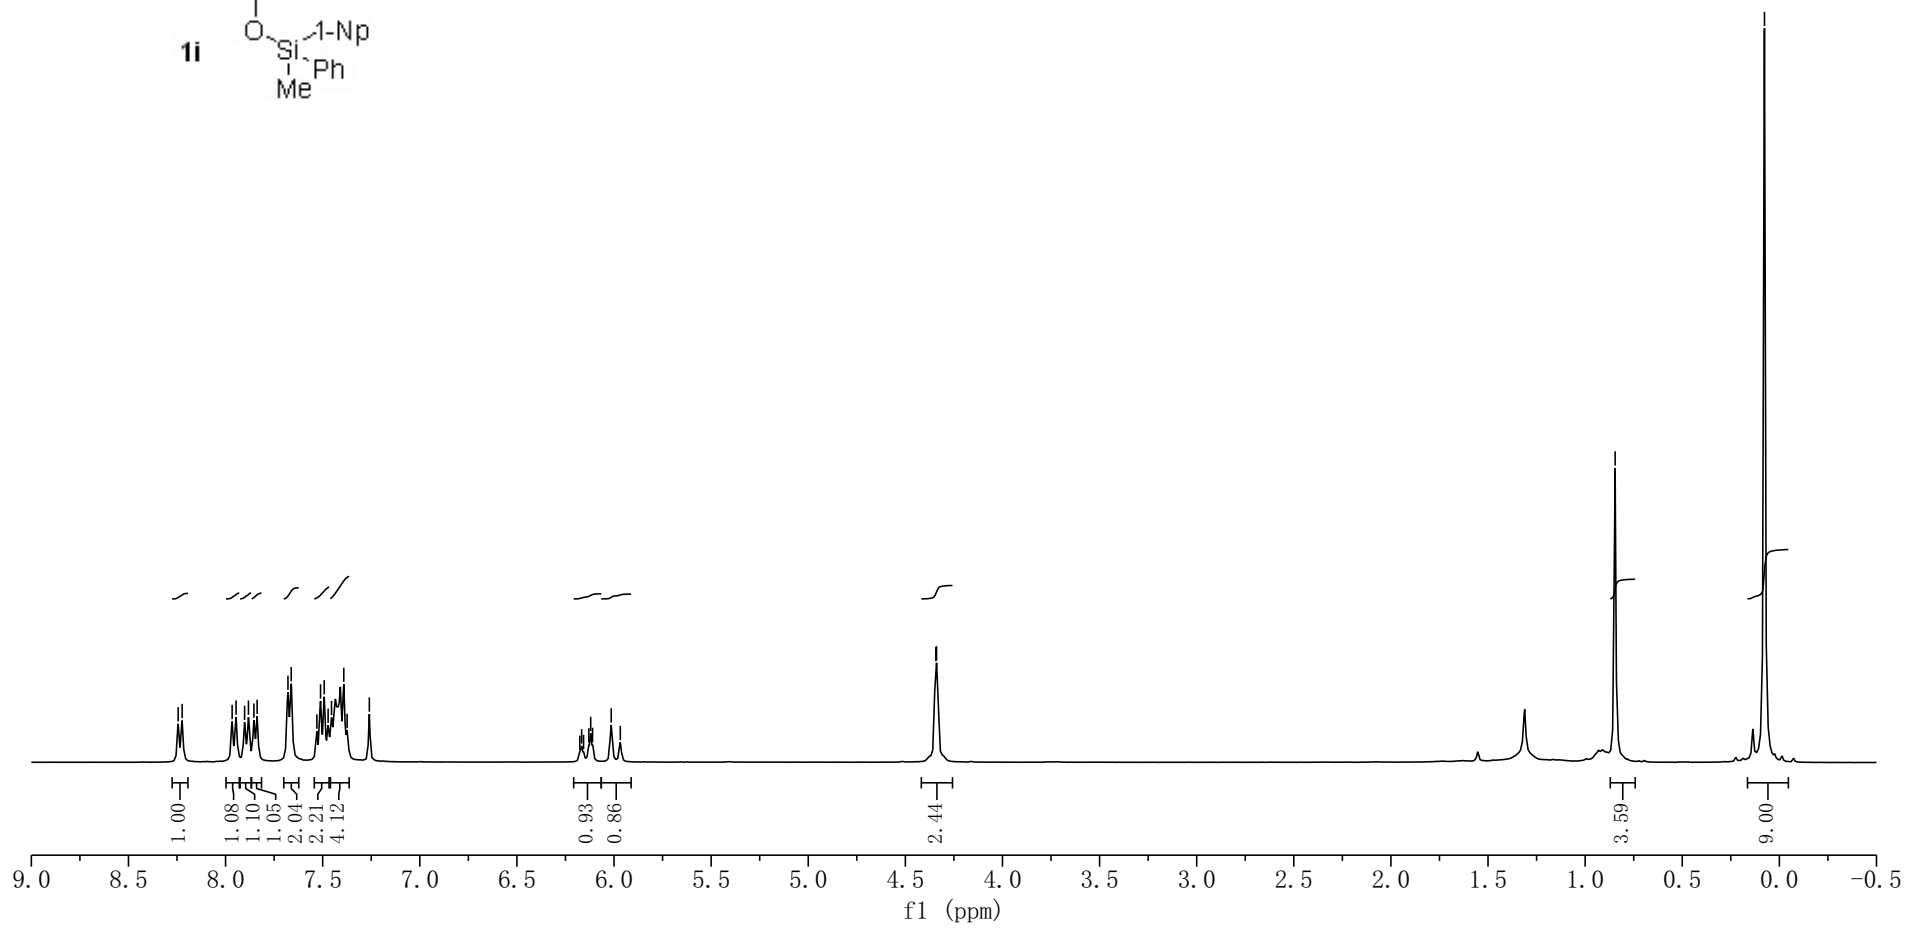

WY-6-75-1 C13 CDCl3 100M Hz

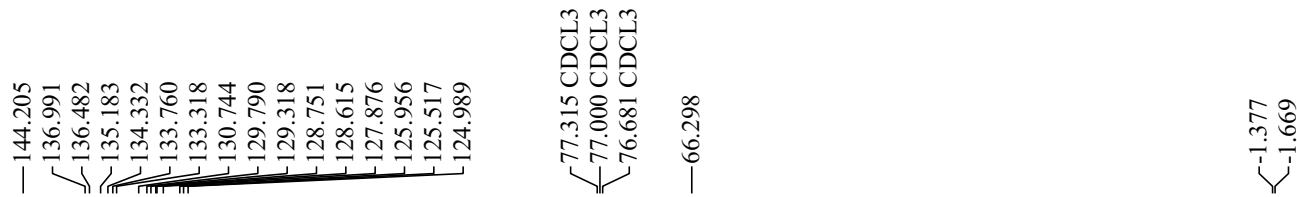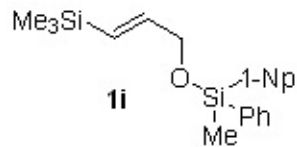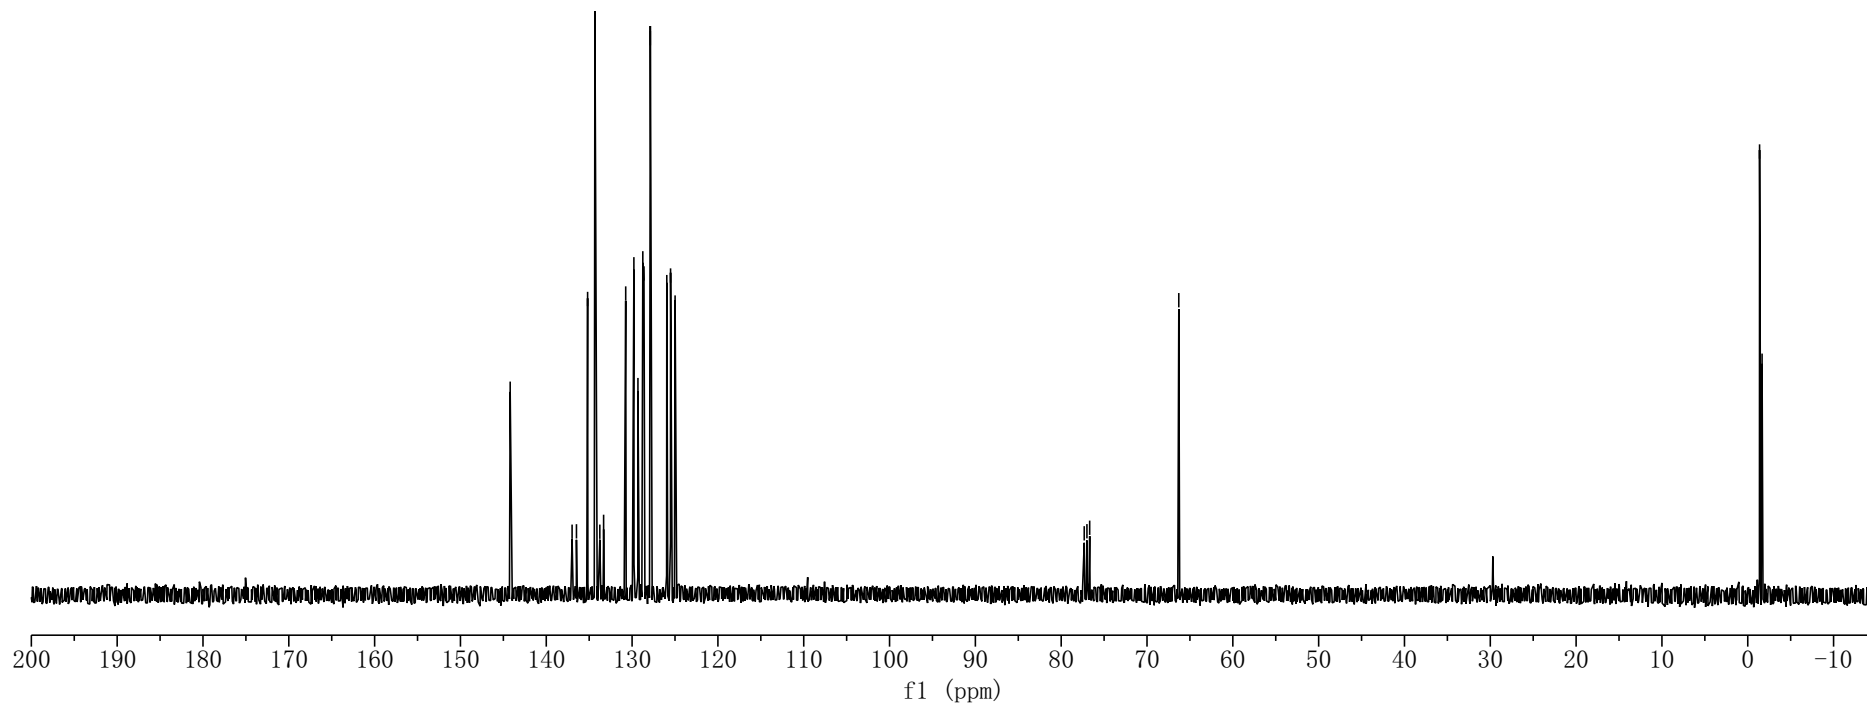



WY-6-11 H1 CDC13 400M Hz

7.728  
7.711  
7.559  
7.542  
7.512  
7.452  
7.434  
7.378  
7.335  
7.317  
7.298  
6.421  
6.374  
6.336  
6.329  
6.321  
6.282  
6.274

4.509  
4.504

0.948

0.385

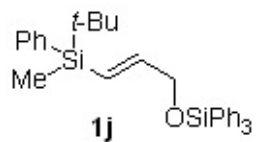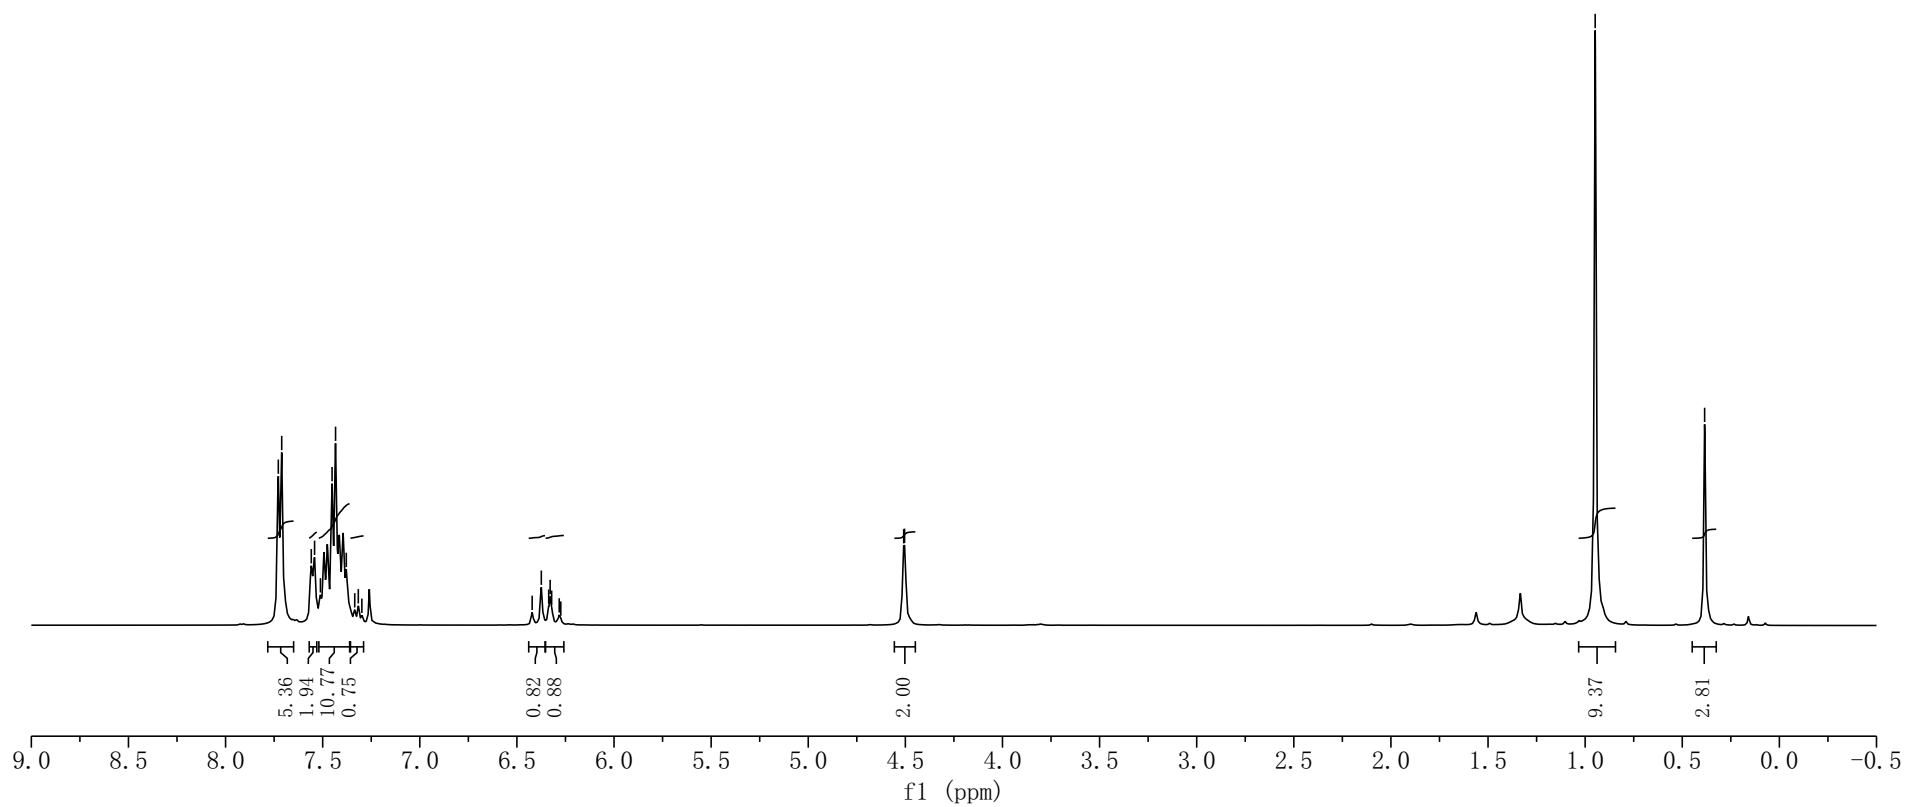

WY-6-45 C13 CDC13 150M Hz

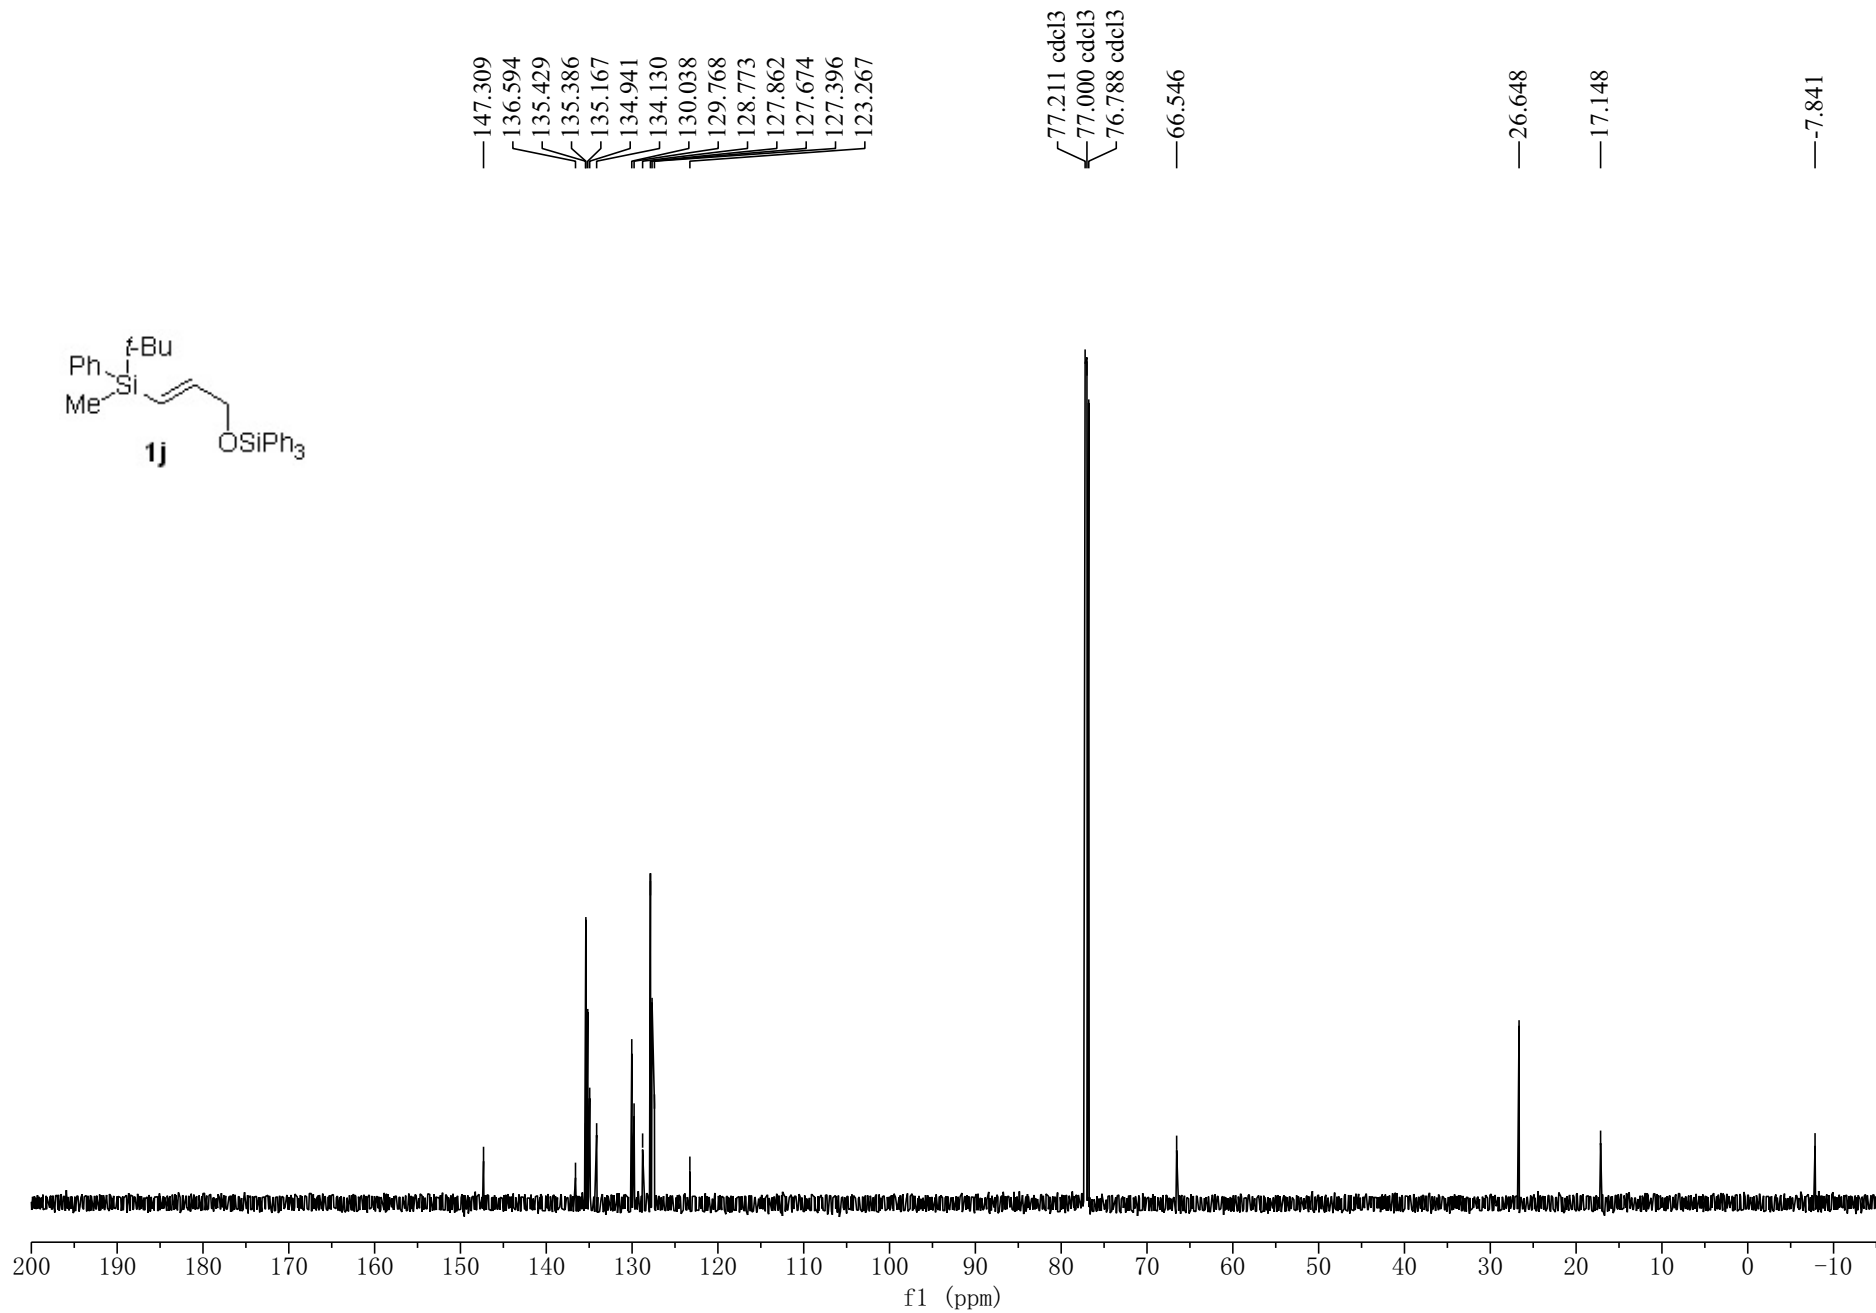

WY-7-104-2 H1 CDCl3 400M Hz

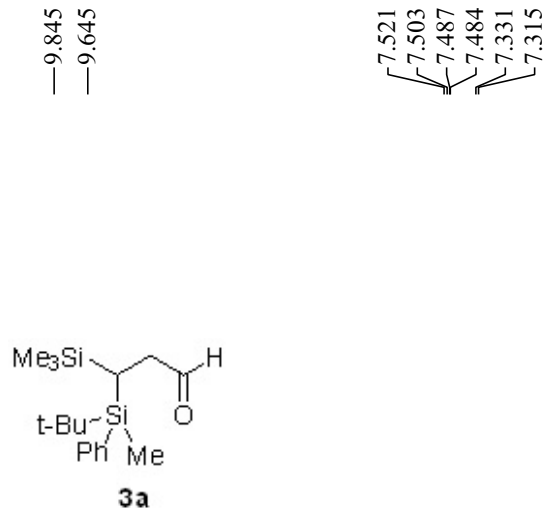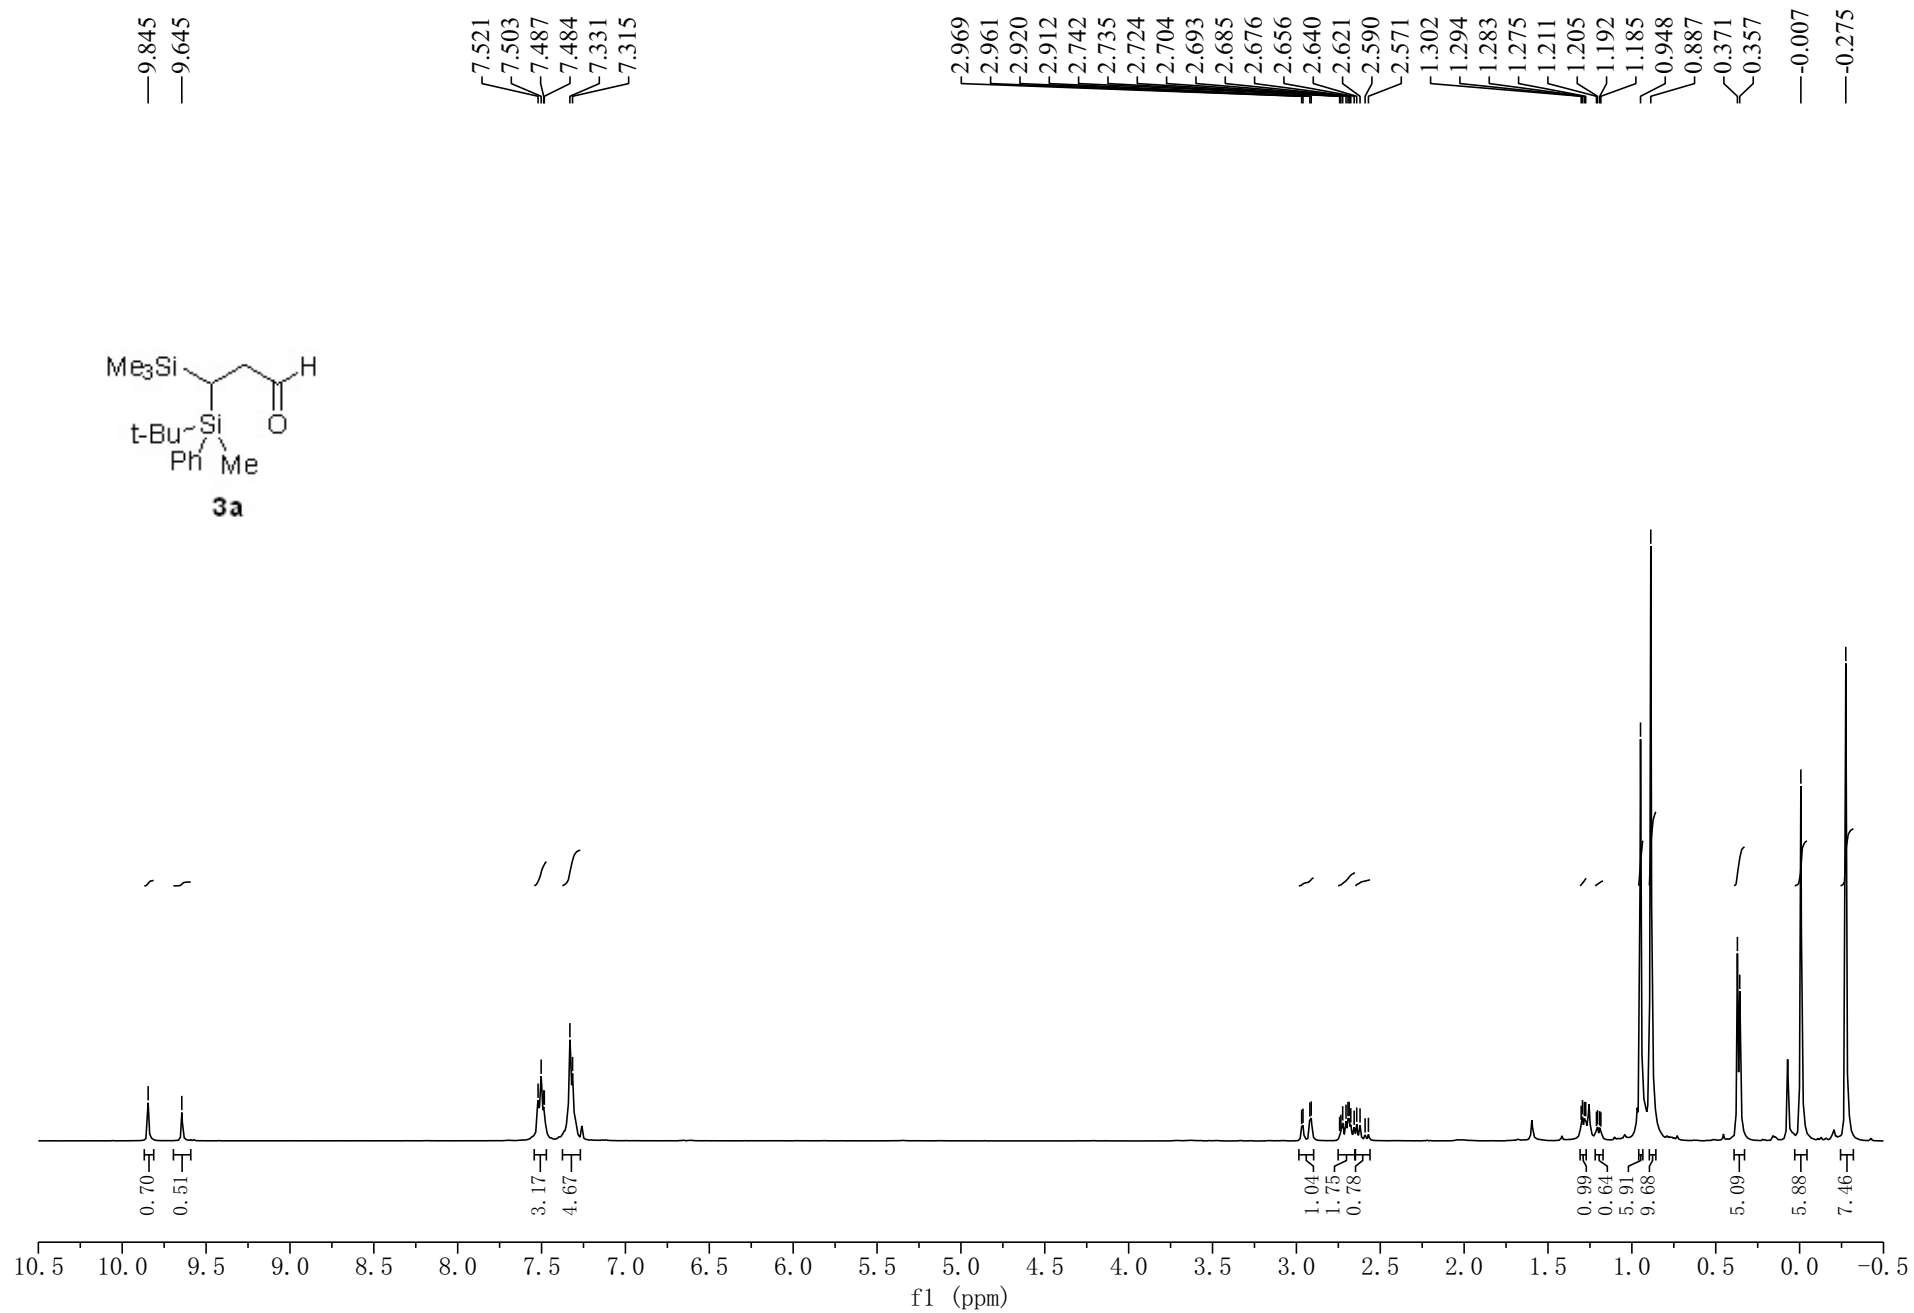



WY-6-7 H1 CDCl3 400M

9.519  
9.390

7.489  
7.478  
7.469  
7.445  
7.428  
7.318  
7.311  
7.296  
7.277  
7.268  
7.258  
7.245

2.864  
2.856  
2.815  
2.807  
2.740  
2.732  
2.717  
2.691  
2.683  
2.659  
2.649  
2.640  
2.609  
2.590  
1.576  
1.569  
1.558  
1.550  
1.510  
1.502  
1.492  
1.484  
0.868  
0.860

0.313  
0.305  
0.235  
0.178  
0.062  
-0.122

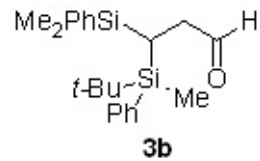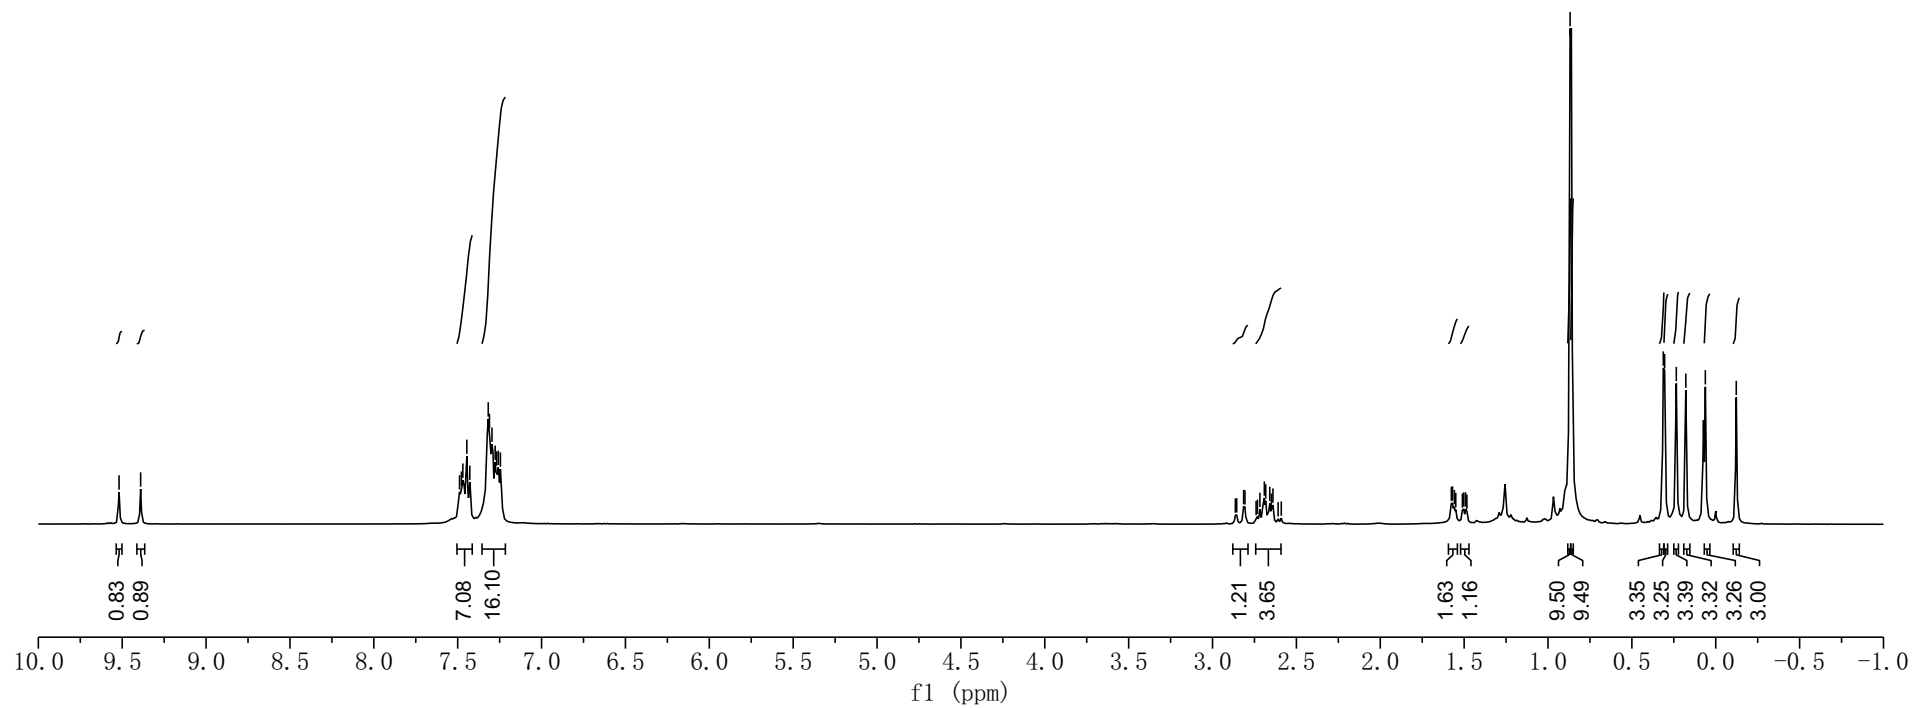

# WY-6-7 C13 CDCI3

201.379  
201.033

139.085  
139.015  
137.006  
136.890  
134.745  
134.731  
133.968  
133.825  
129.010  
128.900  
128.838  
128.820  
127.687  
127.598  
127.539  
127.376

77.212 cdcl3  
77.000 cdcl3  
76.788 cdcl3

42.452  
41.374

27.965  
27.655

18.919  
18.581

1.014  
0.514  
1.023  
1.221  
1.501  
2.229  
5.640  
7.650

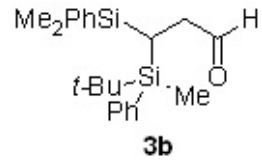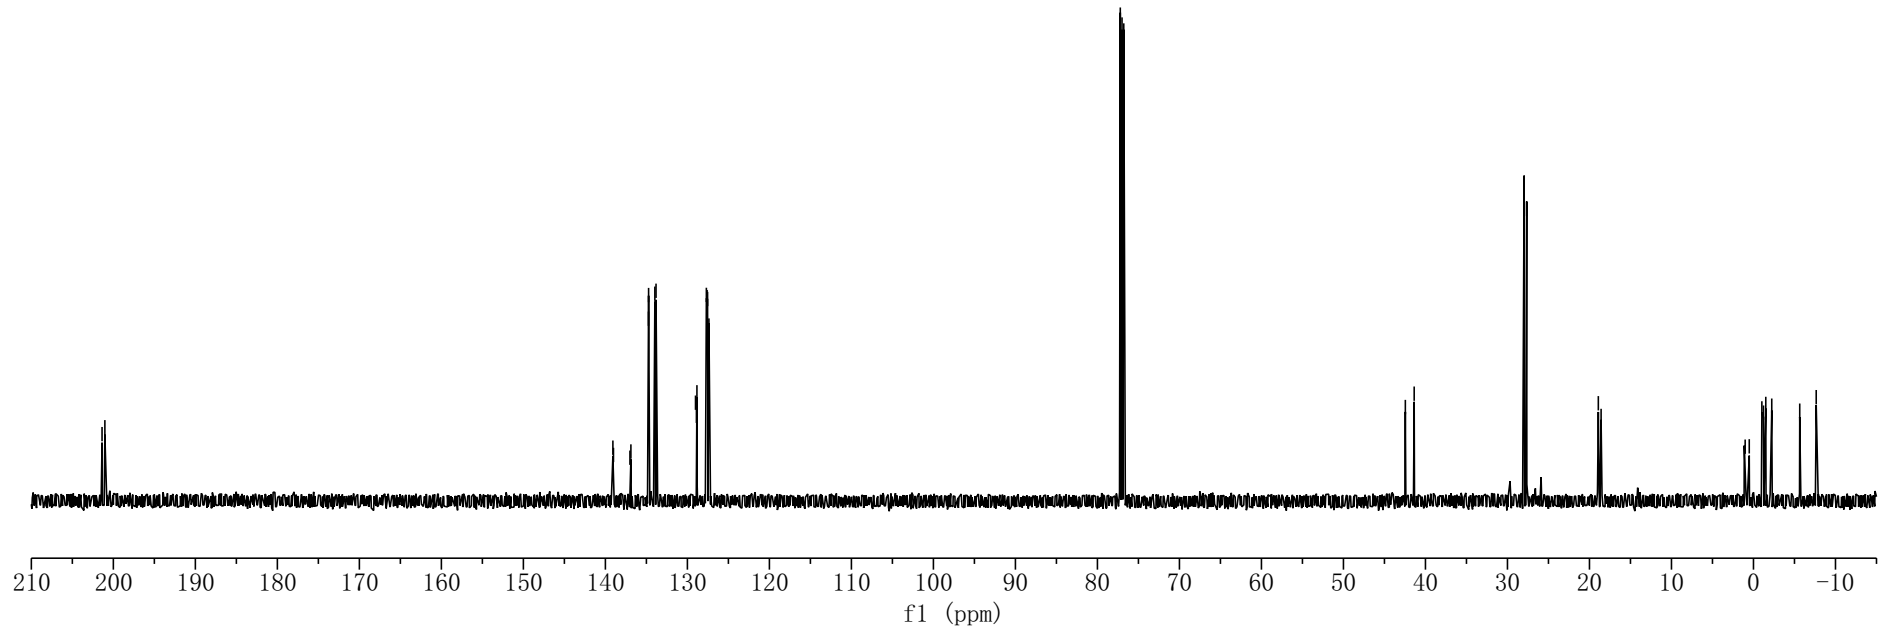

WY-7-19-2B H1 CDCl3 400M Hz

9.834  
9.641

7.539  
7.521  
7.348  
7.330  
7.312  
7.296

2.954  
2.945  
2.905  
2.895  
2.807  
2.799  
2.757  
2.748  
2.728  
2.696  
2.678  
2.668  
2.649  
2.618  
2.599  
1.445  
1.436  
1.429  
1.419  
1.325  
1.316  
1.306  
1.298  
0.955  
0.895  
0.881  
0.856  
0.803  
0.783  
0.763  
0.553  
0.546  
0.534  
0.526  
0.515  
0.486  
0.396  
0.293  
0.236  
0.227  
0.170

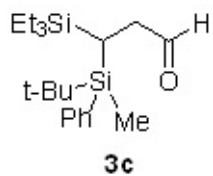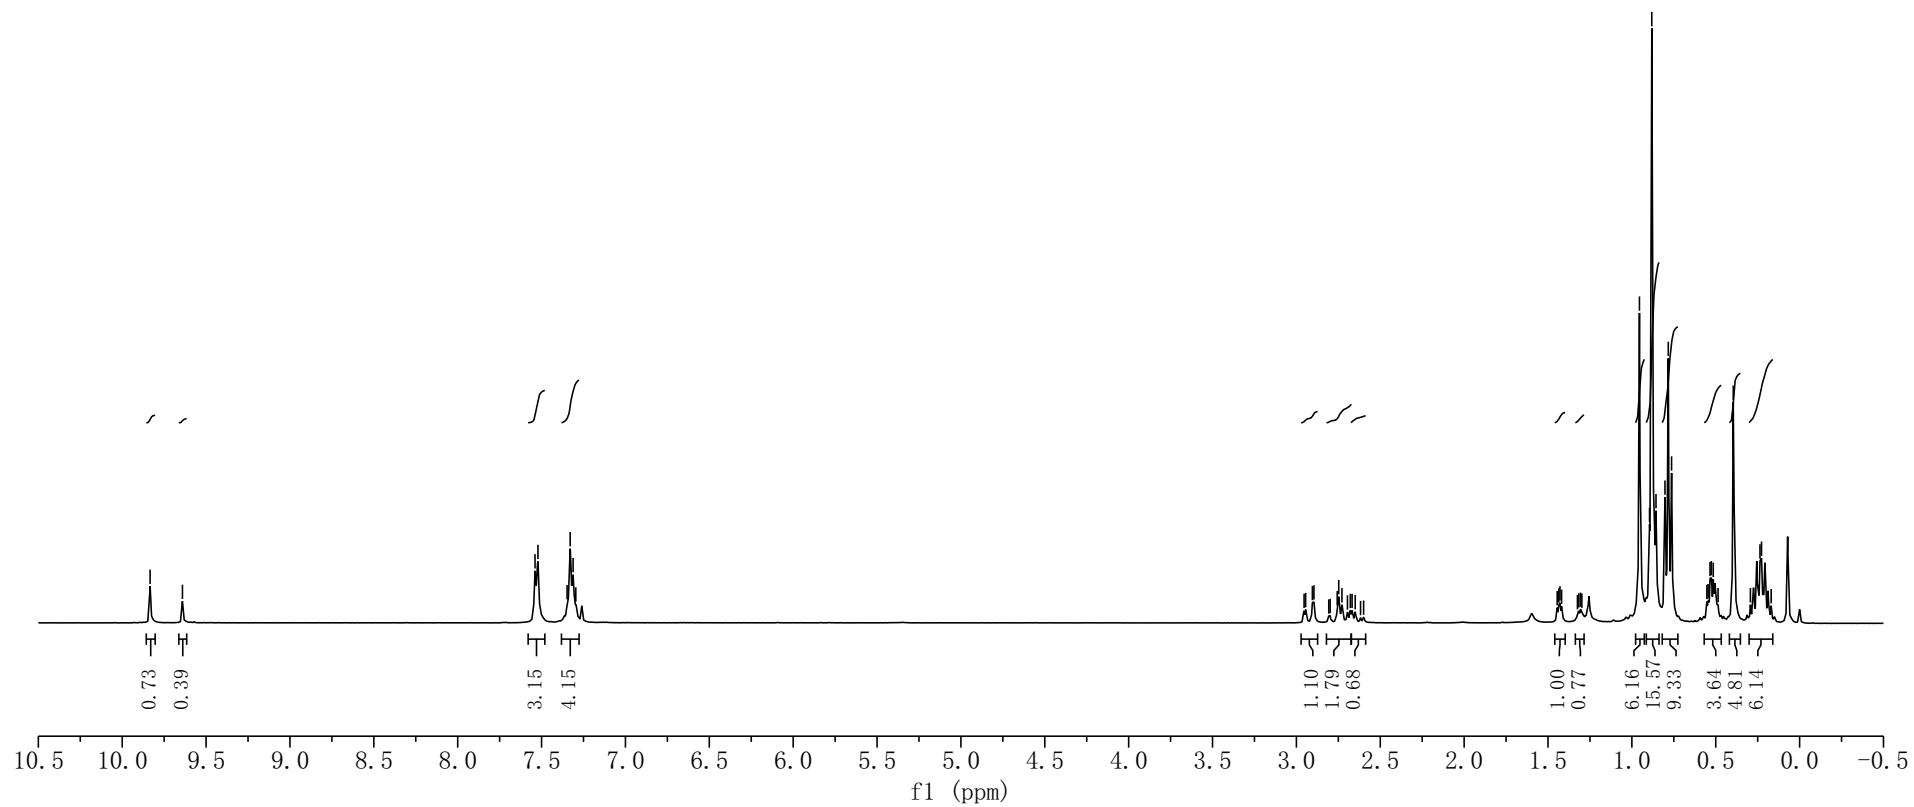

WY-6-62 C13 CDCI3 150M Hz

201.804  
201.612

137.556  
137.135  
134.824  
134.549  
128.924  
128.840  
127.544  
127.360

77.212 cdcl3  
77.000 cdcl3  
76.788 cdcl3

42.418  
41.281

28.117  
27.882

19.026  
18.911

7.649  
7.627

4.339  
3.879

-2.109  
-2.805

-5.260  
-7.116

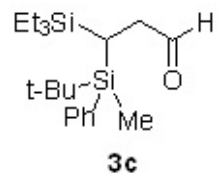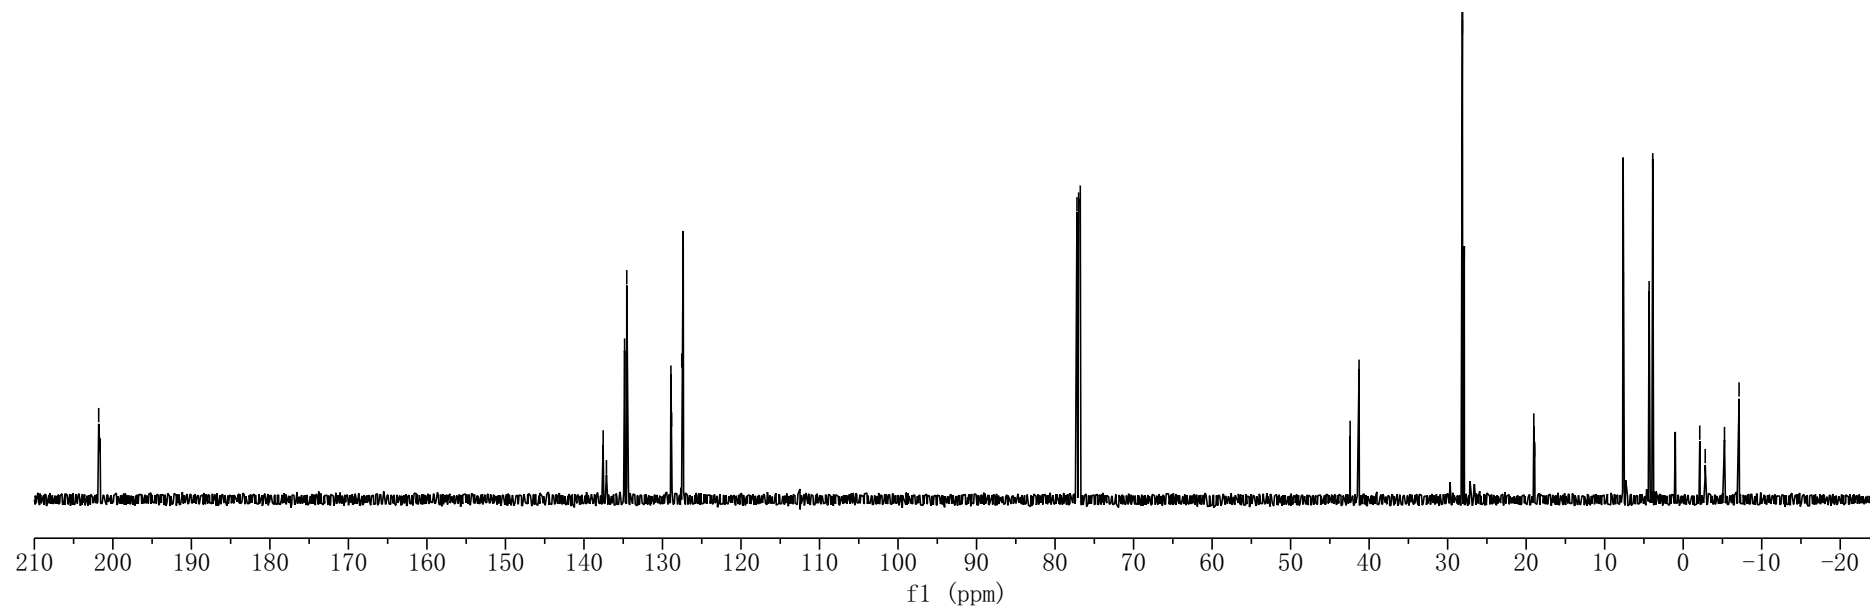



WY-6-29-2 H1 CD13 400M Hz

9.821  
9.647

7.533  
7.517  
7.322  
7.304

2.933  
2.925  
2.883  
2.875  
2.826  
2.820  
2.776  
2.770  
2.723  
2.707  
2.673  
2.657  
2.638  
2.606  
2.587  
1.397  
1.383  
1.373  
1.283  
1.249  
1.235  
1.203  
1.185  
1.163  
1.125  
1.087  
0.946  
0.876  
0.865  
0.847  
0.811  
0.794  
0.776  
0.477  
0.462  
0.437  
0.381  
0.260  
0.188  
0.181  
0.109

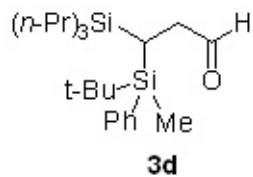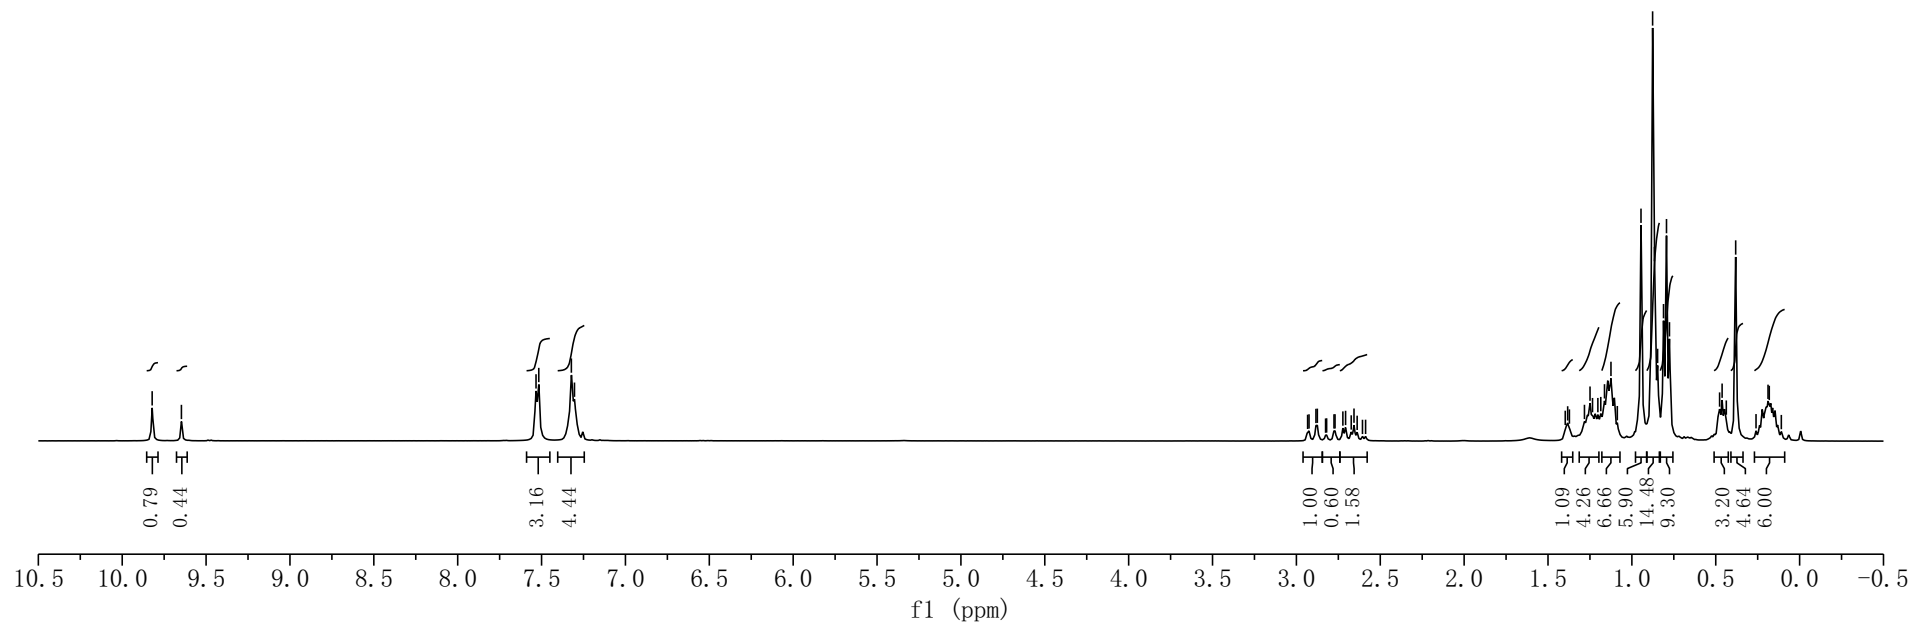

WY-6-29-2 C13 CDC13 150M Hz

201.781  
201.575

137.587  
137.148  
134.836  
134.583  
128.878  
128.838  
127.538  
127.416

77.211 cdcl3  
77.000 cdcl3  
76.788 cdcl3

42.459  
41.325  
28.154  
27.912  
19.061  
18.990  
18.645  
18.574  
17.591  
17.531  
16.290  
15.900  
-1.566  
-2.176  
-5.163  
-7.129

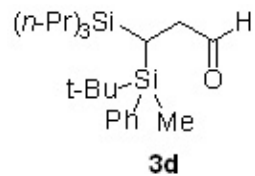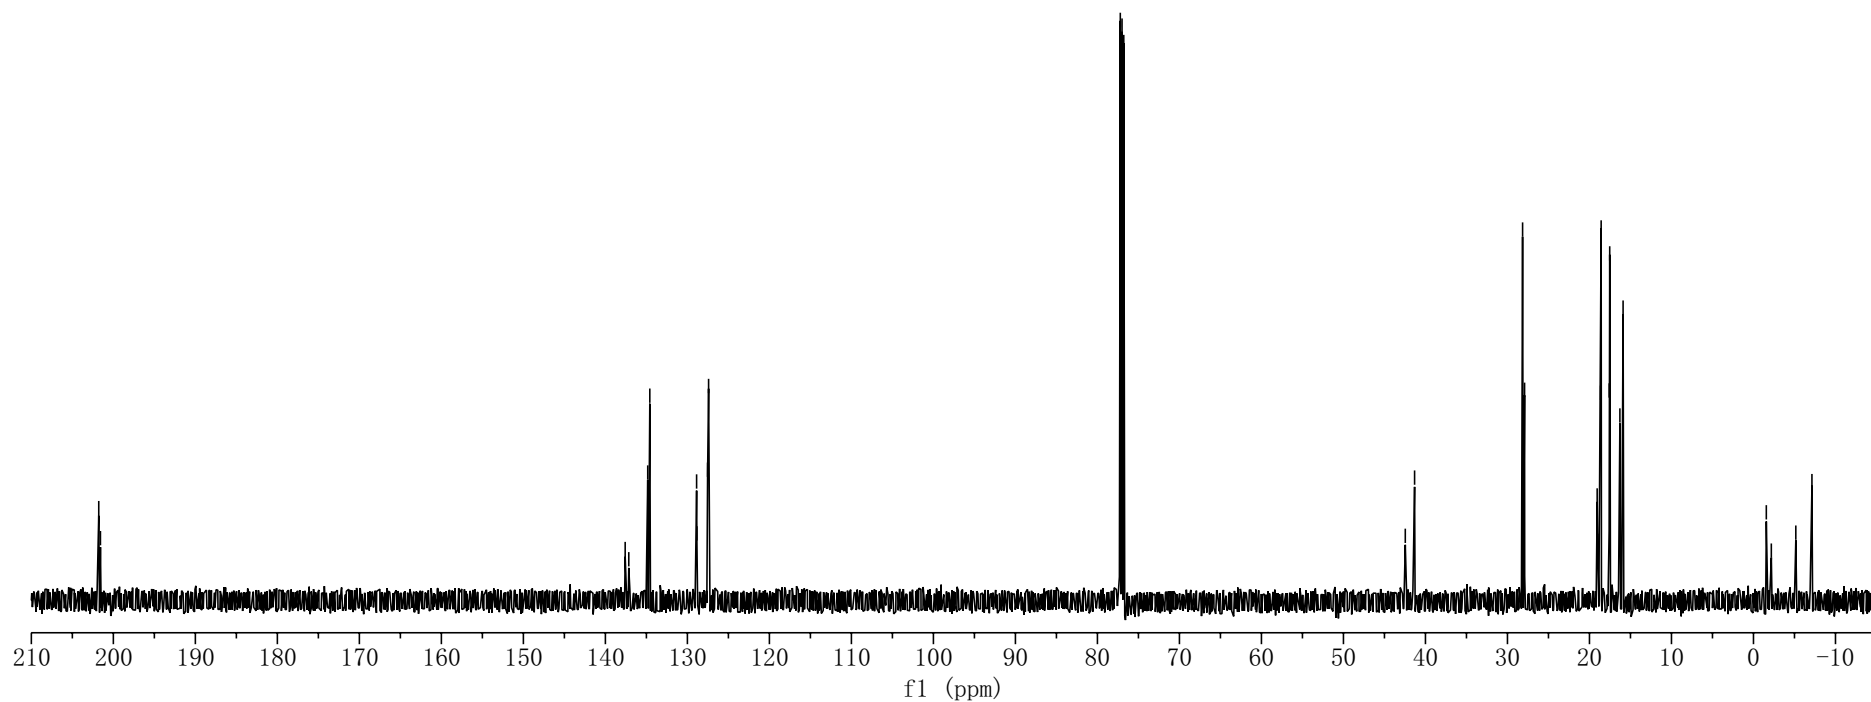

WY-6-30-2B H1 CDCl3 400M Hz

9.863  
9.764

7.608  
7.591  
7.347  
7.312  
7.302  
7.262

3.152  
3.144  
3.102  
3.093  
3.038  
3.026  
2.986  
2.975  
2.915  
2.904  
2.863  
2.851  
1.748  
1.737  
1.725  
0.974  
0.956  
0.916  
0.897  
0.880  
0.787  
0.751  
0.715  
0.483  
0.468

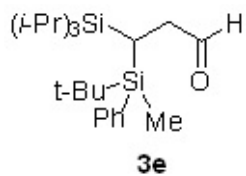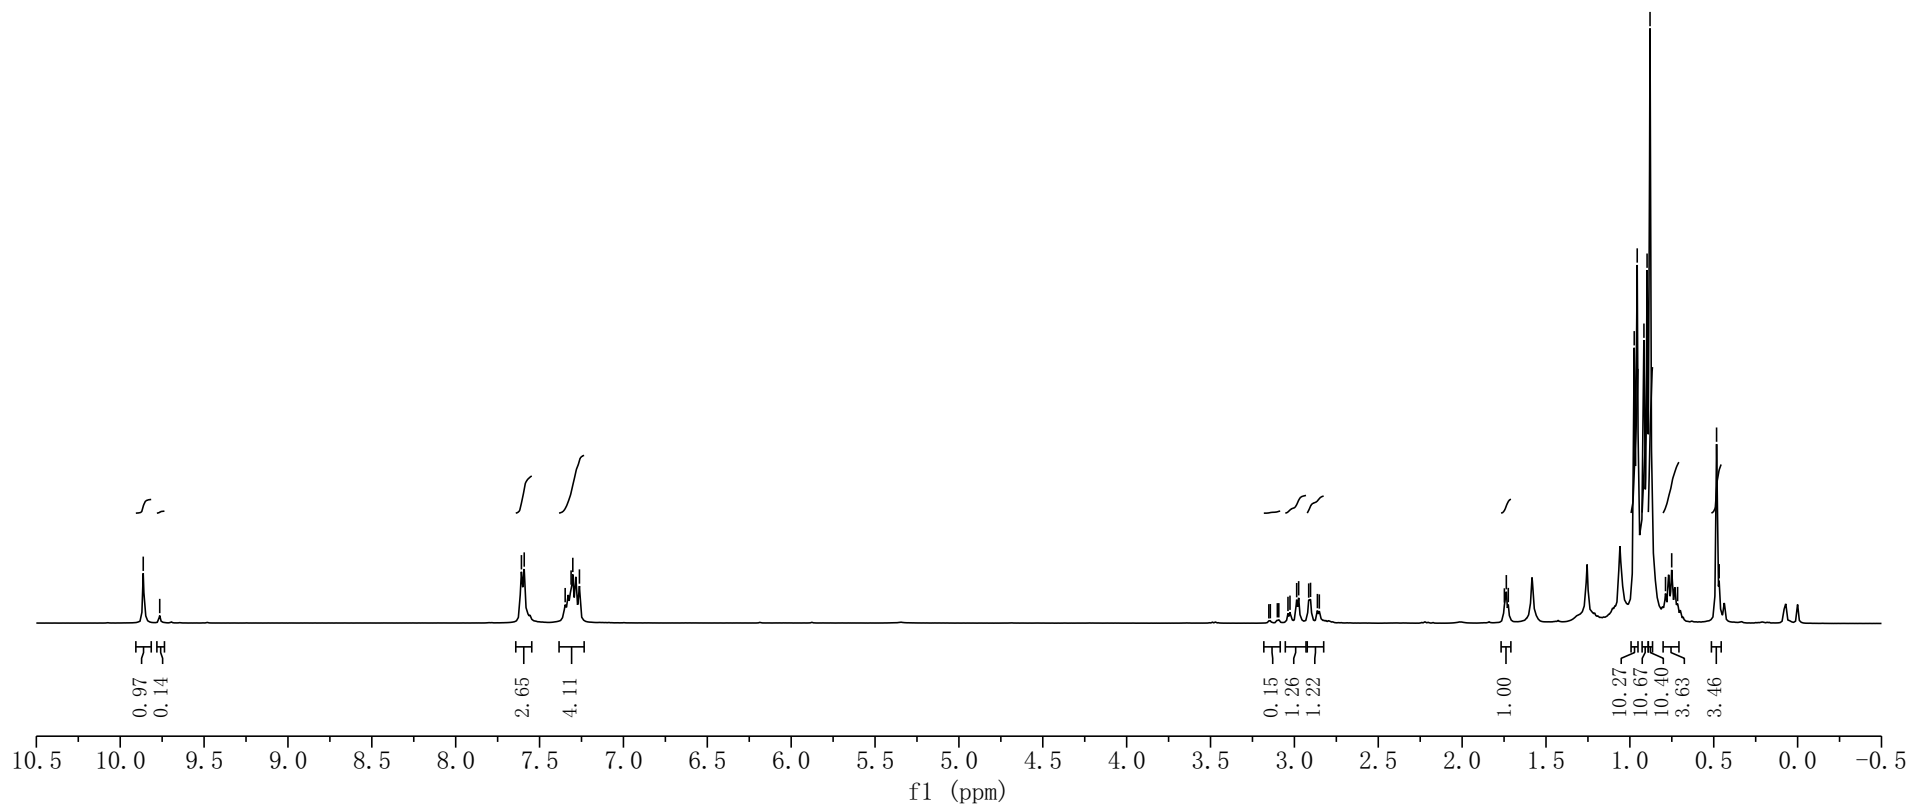

WY-6-30-2B C13 CDCI3 150M Hz

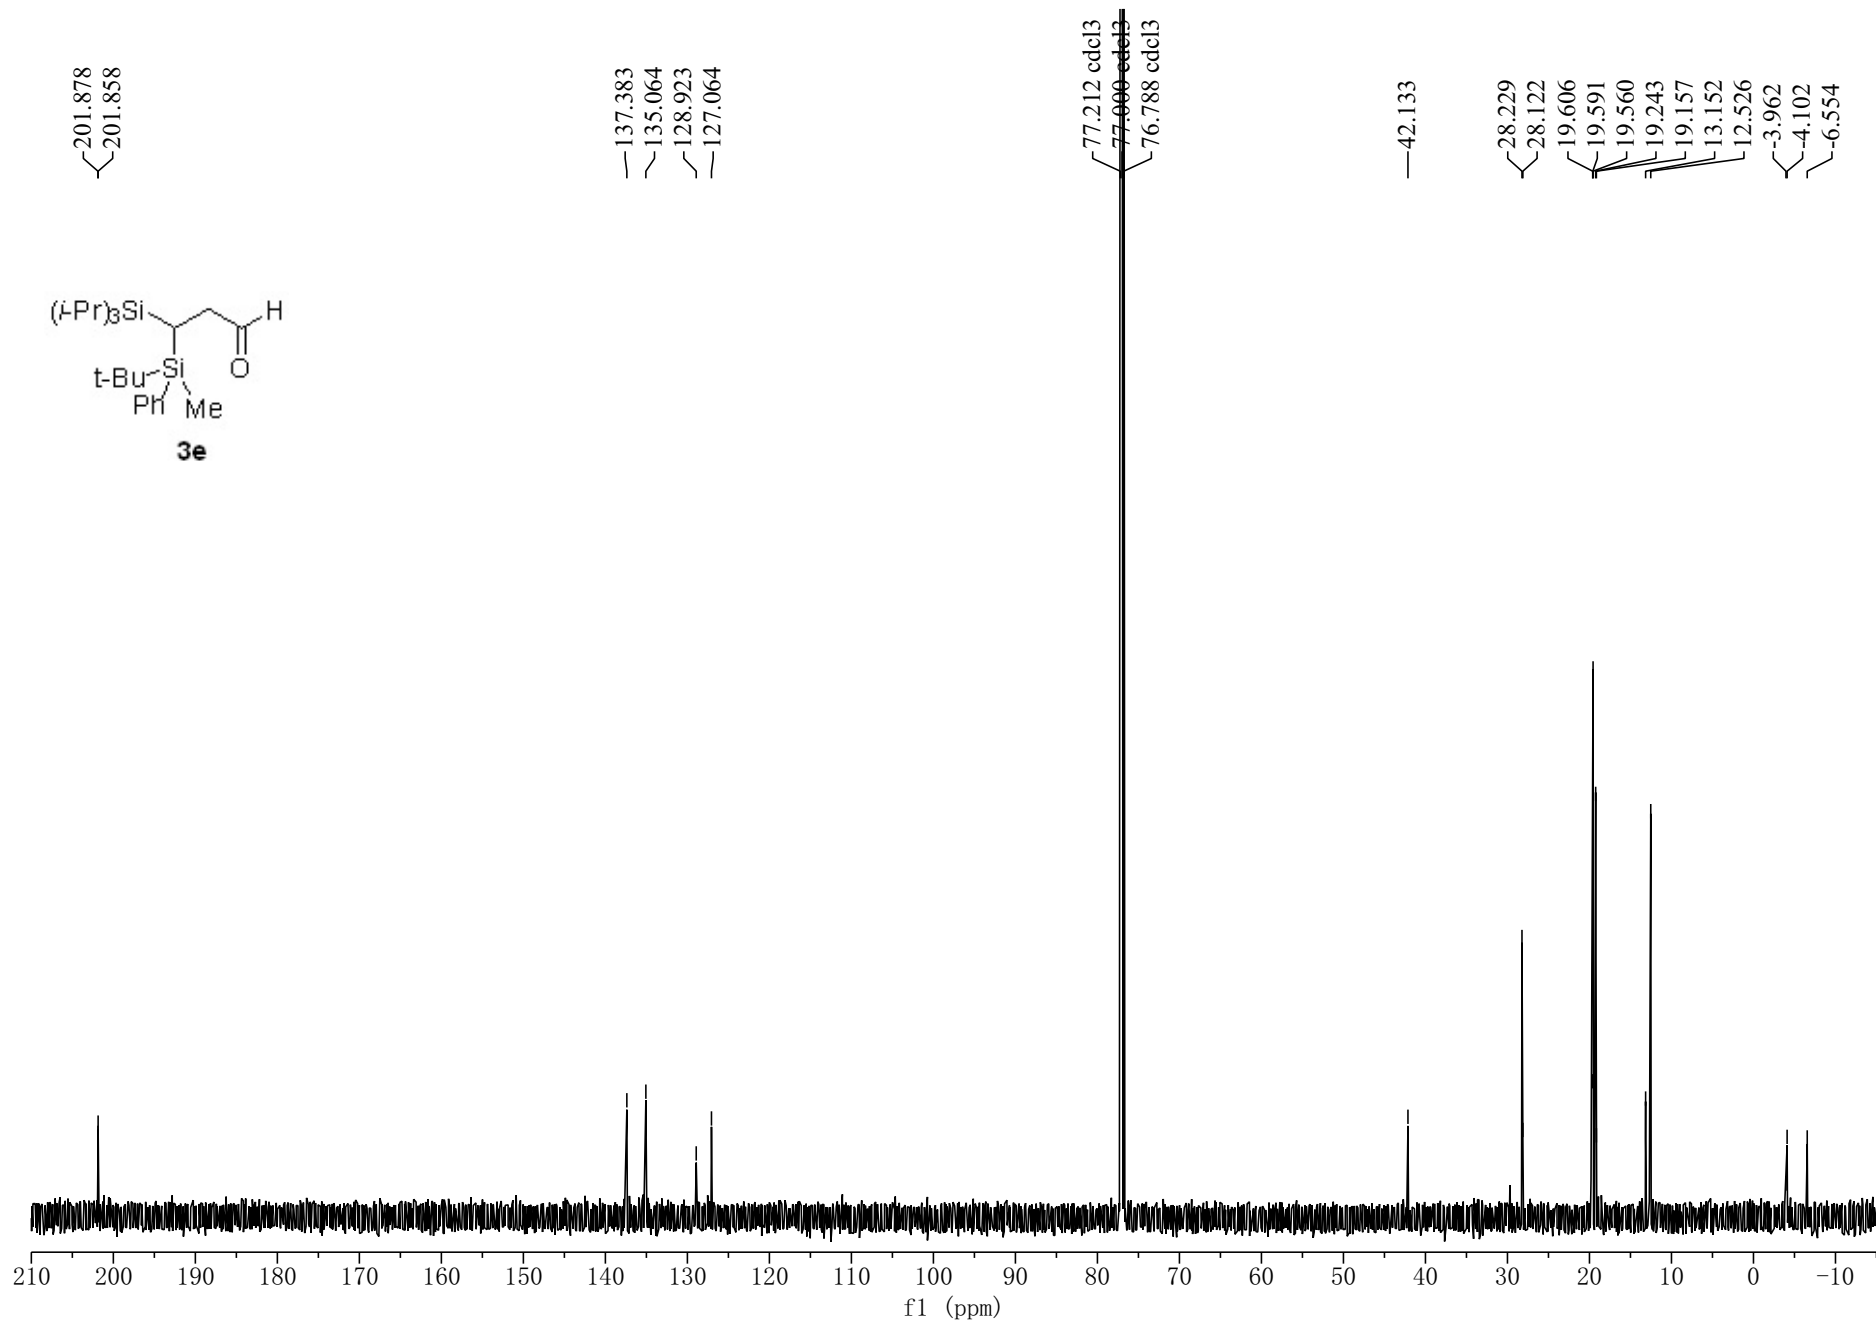

WY-8-6-2 H1 CDCl3 400M HZ

—9.580

7.412  
7.395  
7.328  
7.311  
7.293  
7.260  
7.238  
7.220  
7.202  
7.148  
7.131  
6.976  
6.958  
6.940

3.195  
3.184  
3.145  
3.134  
3.085  
3.073  
3.034  
3.022  
2.540  
2.529  
2.518

—0.849

—0.101

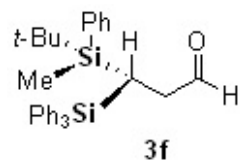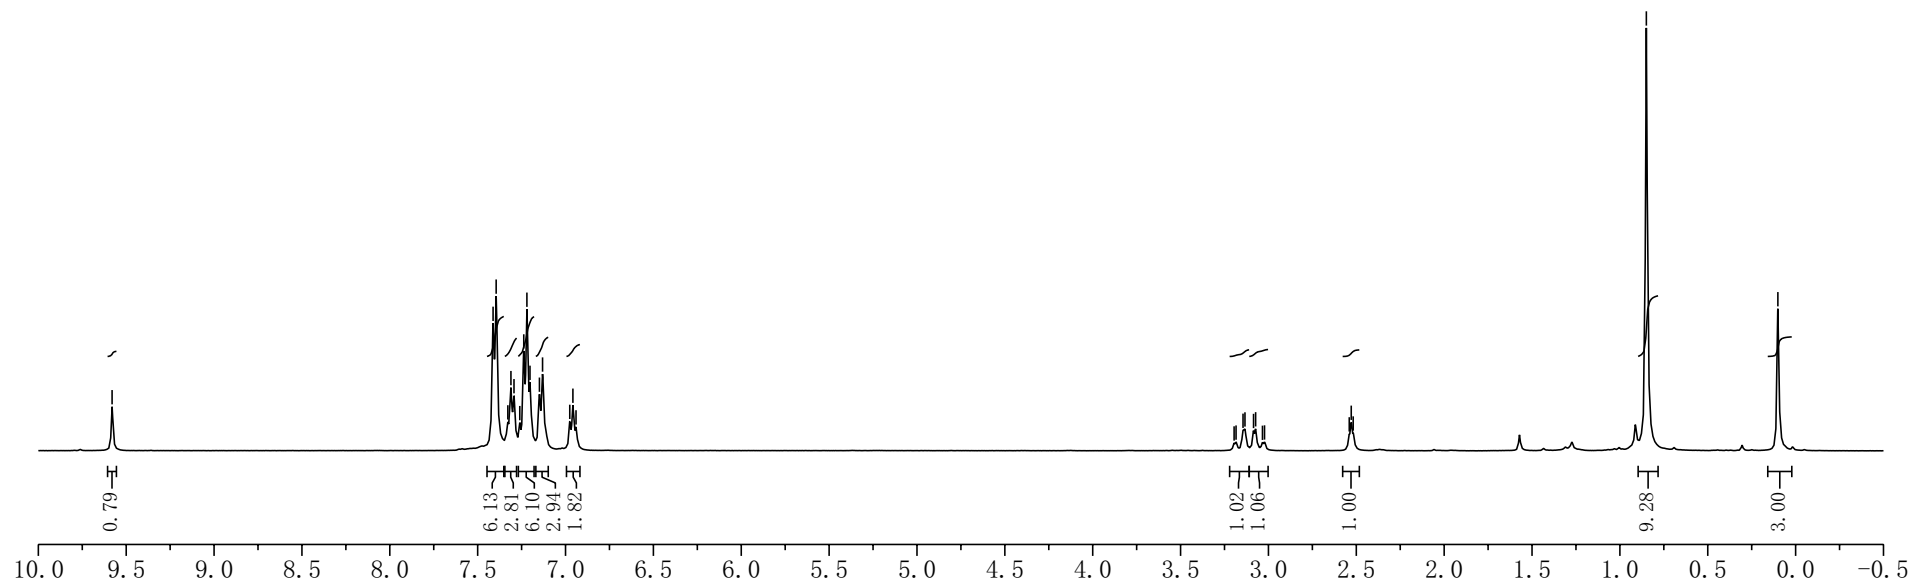

WY-8-6-2 C13 CDCl3 100M Hz

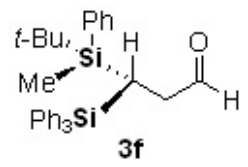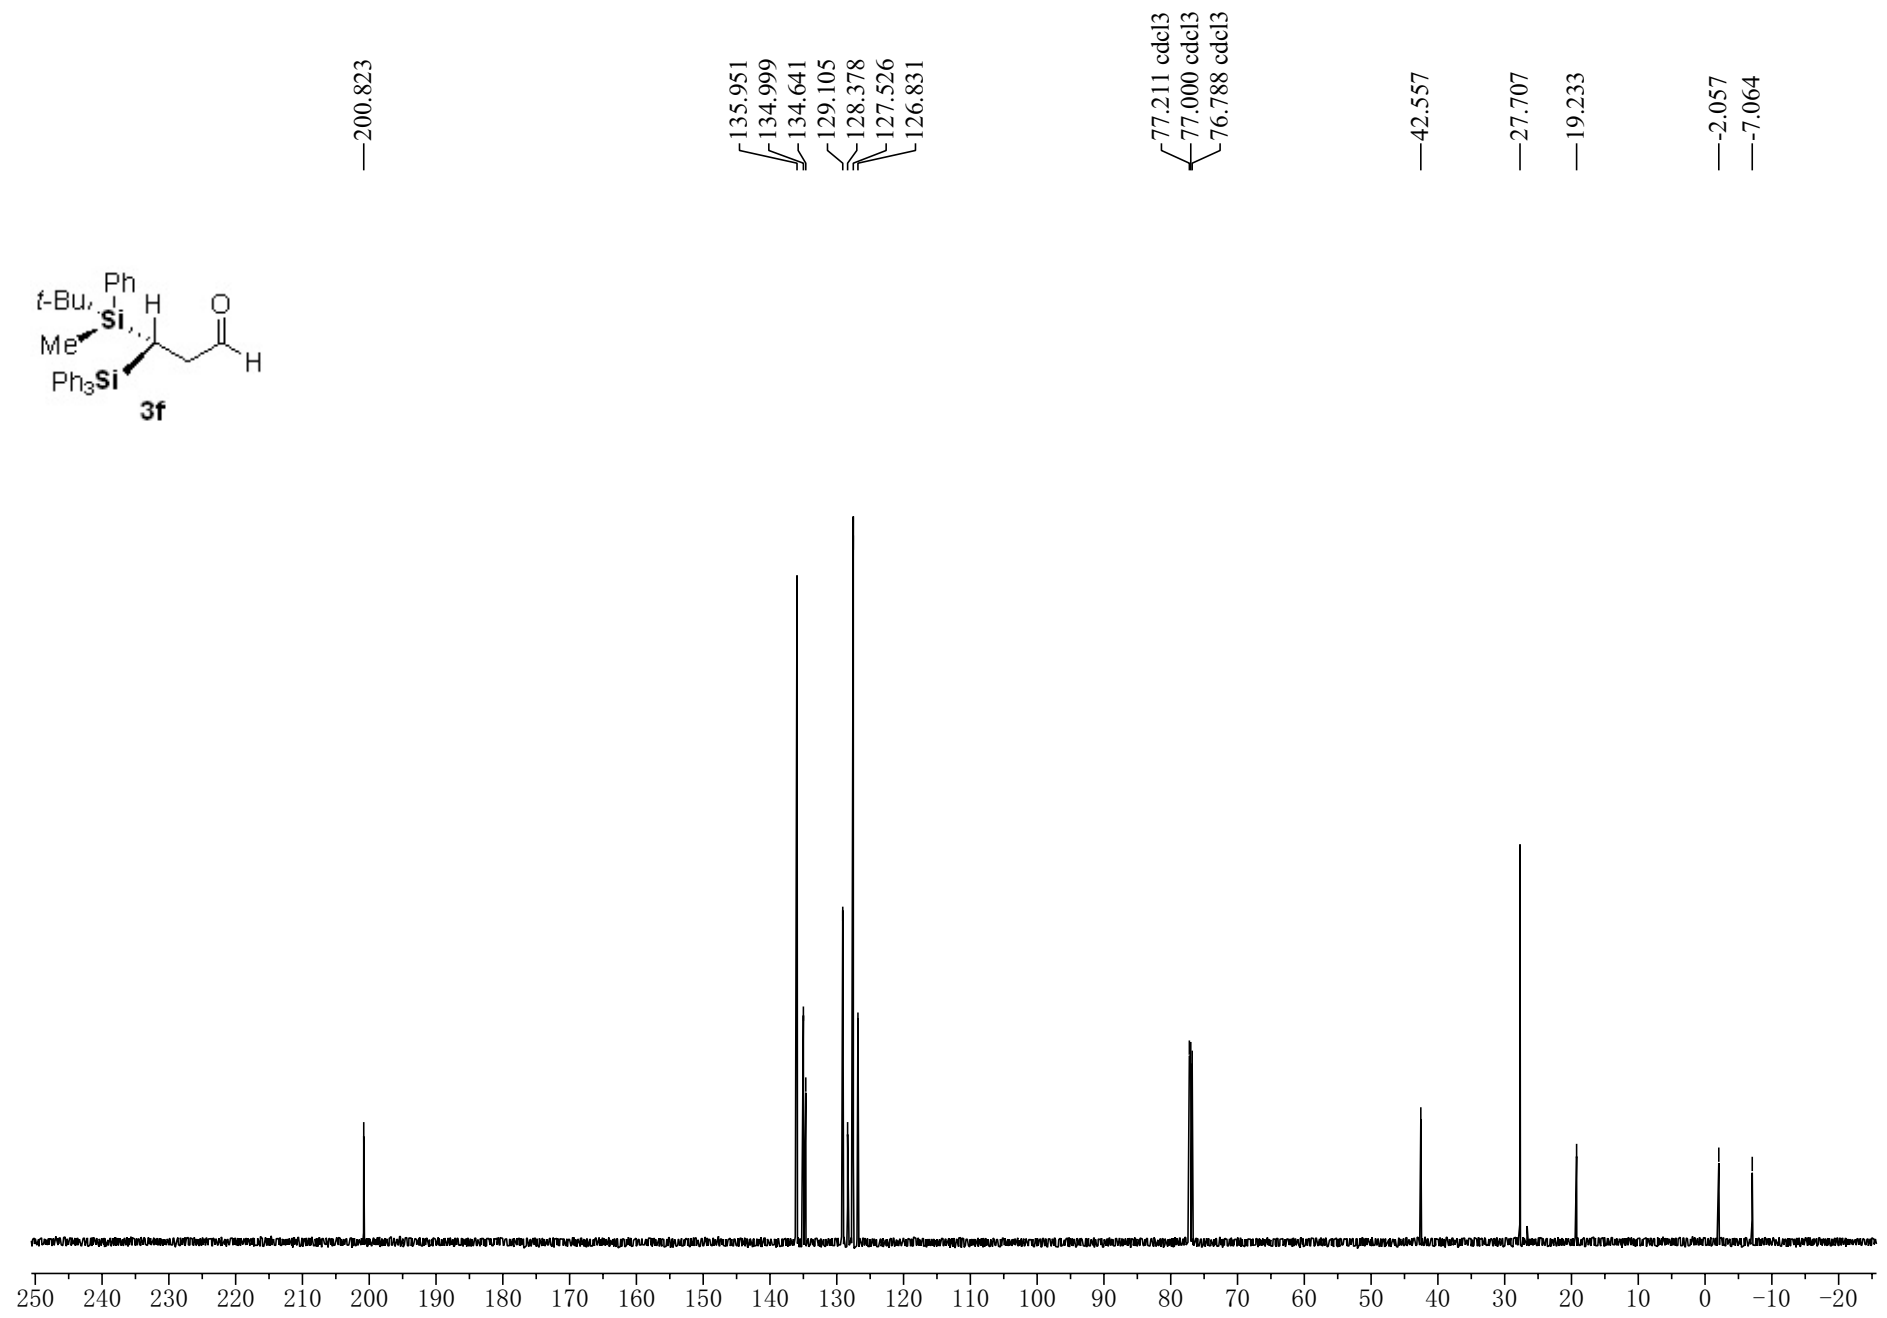

WY-6-67 H1 CDCl3 400M Hz

9.242  
9.089  
7.965  
7.944  
7.825  
7.811  
7.792  
7.740  
7.723  
7.591  
7.572  
7.549  
7.508  
7.490  
7.457  
7.424  
7.406  
7.389  
7.363  
7.326  
7.276  
7.242  
7.190

2.984  
2.968  
2.959  
2.880  
2.849  
2.802

1.577

0.536  
0.520

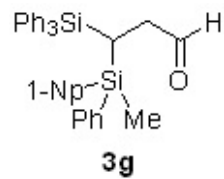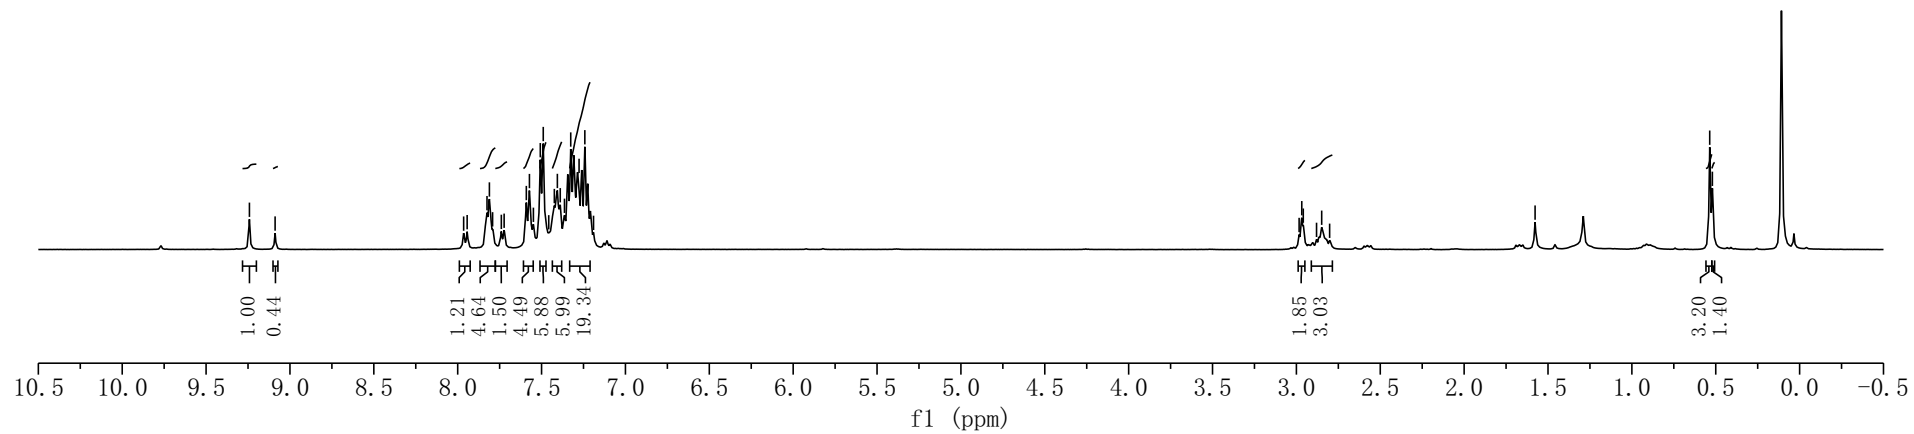

WY-6-66 C13 CDCl3 100M Hz

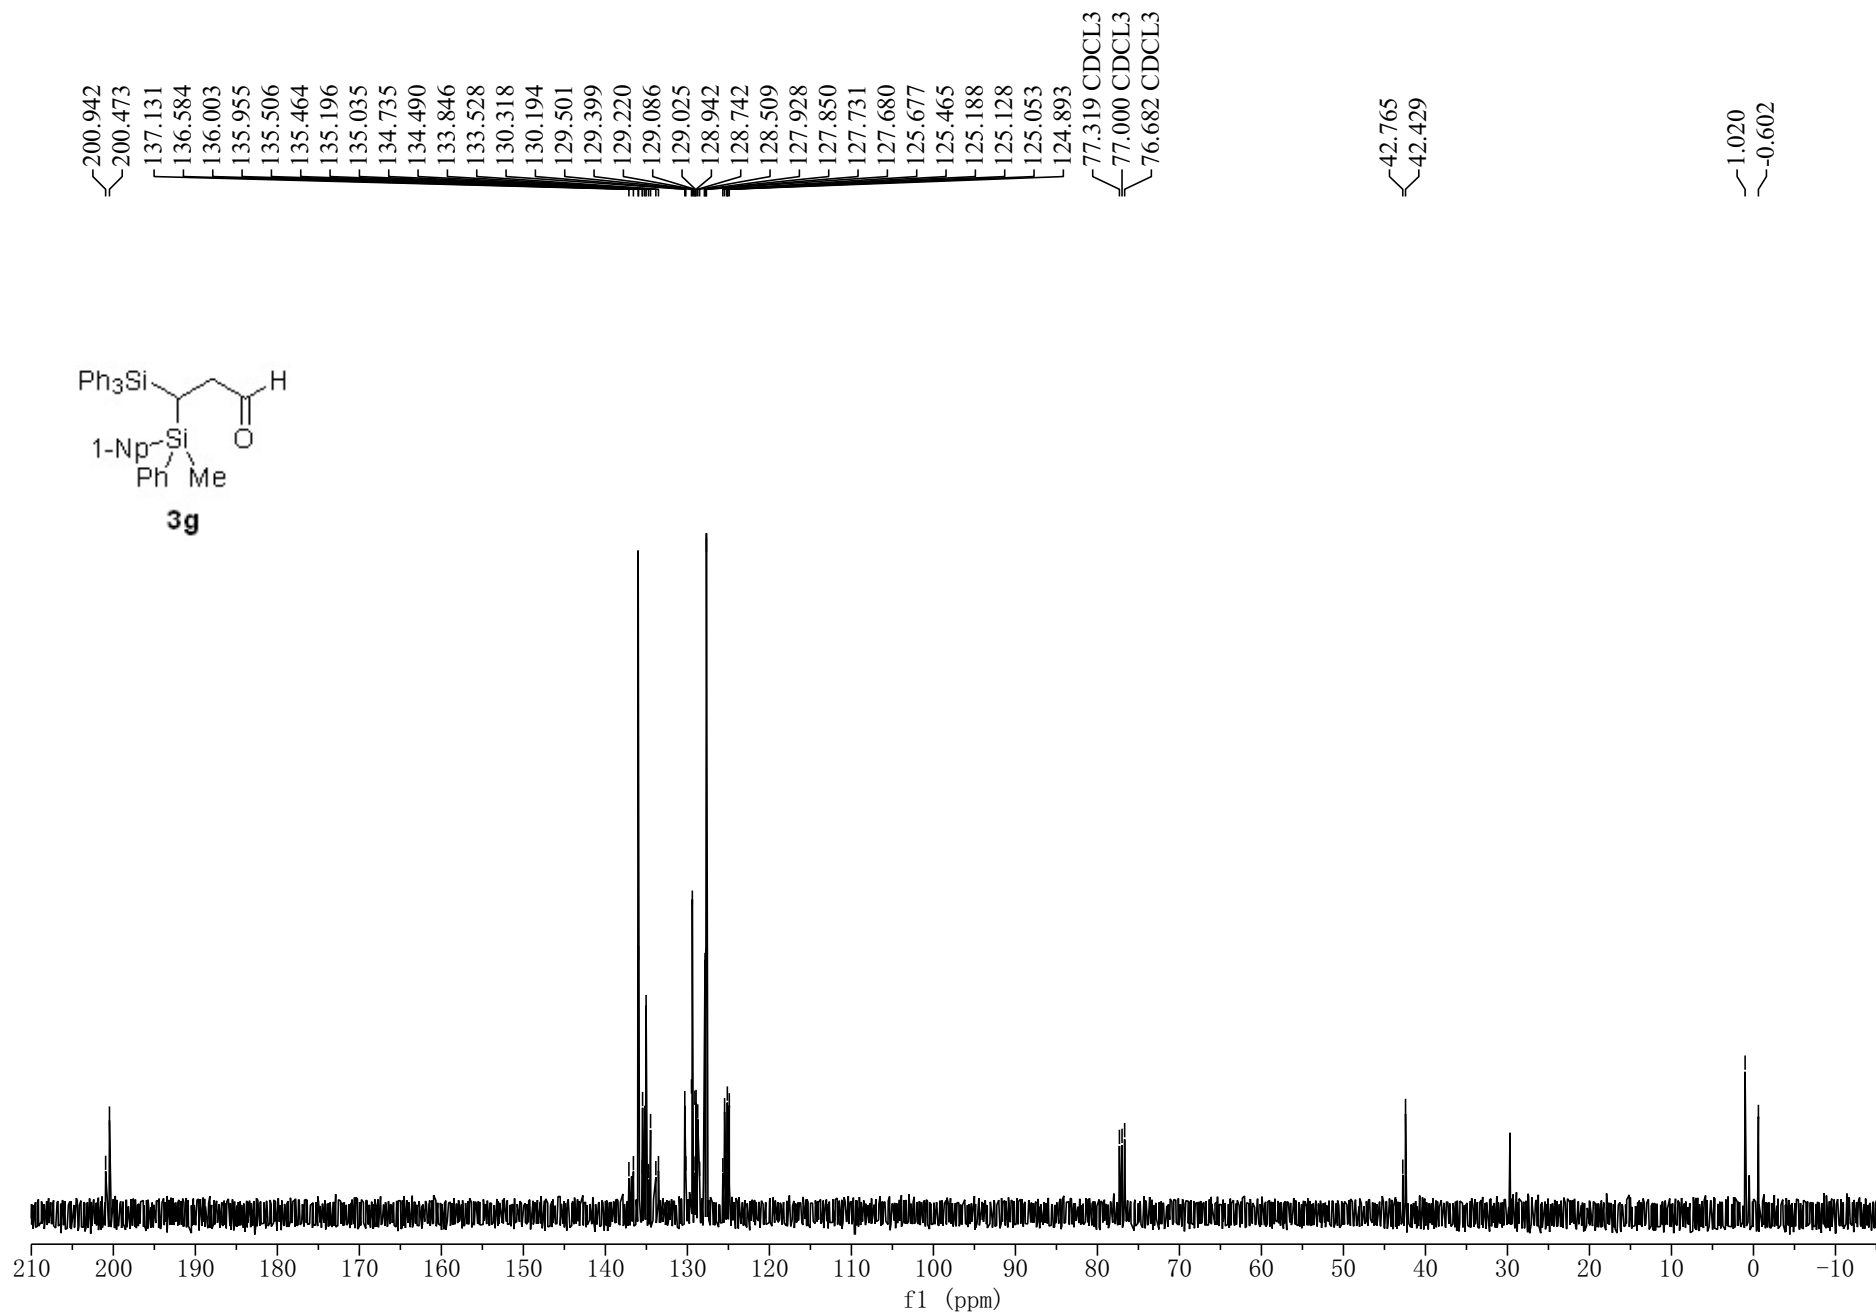



CH-1-20 H1 CDCI3 400M Hz

9.657  
9.571  
8.049  
8.028  
7.895  
7.875  
7.838  
7.802  
7.751  
7.733  
7.559  
7.543  
7.481  
7.443  
7.404  
7.326  
7.311

2.880  
2.821  
2.813  
2.750  
1.919  
1.905  
1.893  
1.776  
1.763  
1.750  
0.850  
0.819  
0.786  
0.767  
0.747  
0.694  
0.674  
0.421  
0.328  
0.245

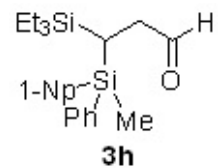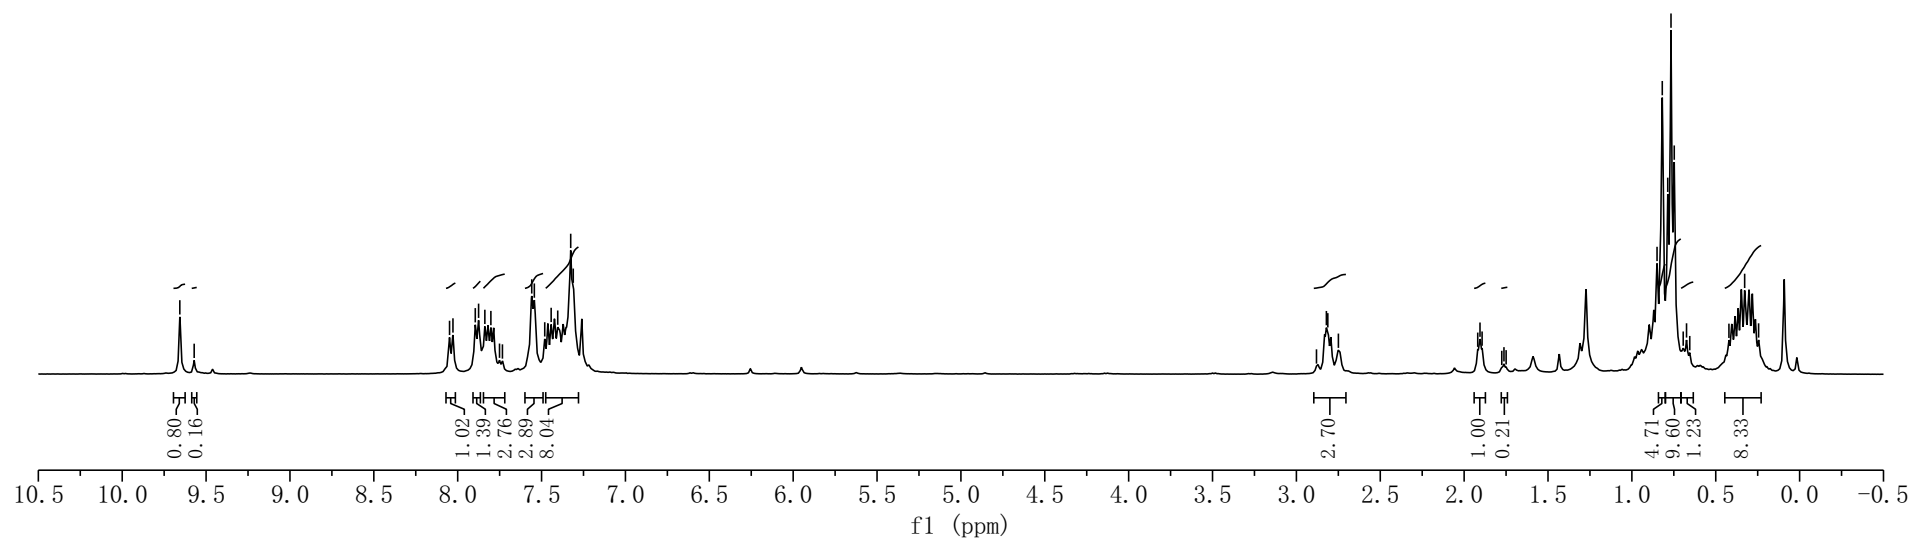

WY-6-82B C13 CDCI3 100M Hz

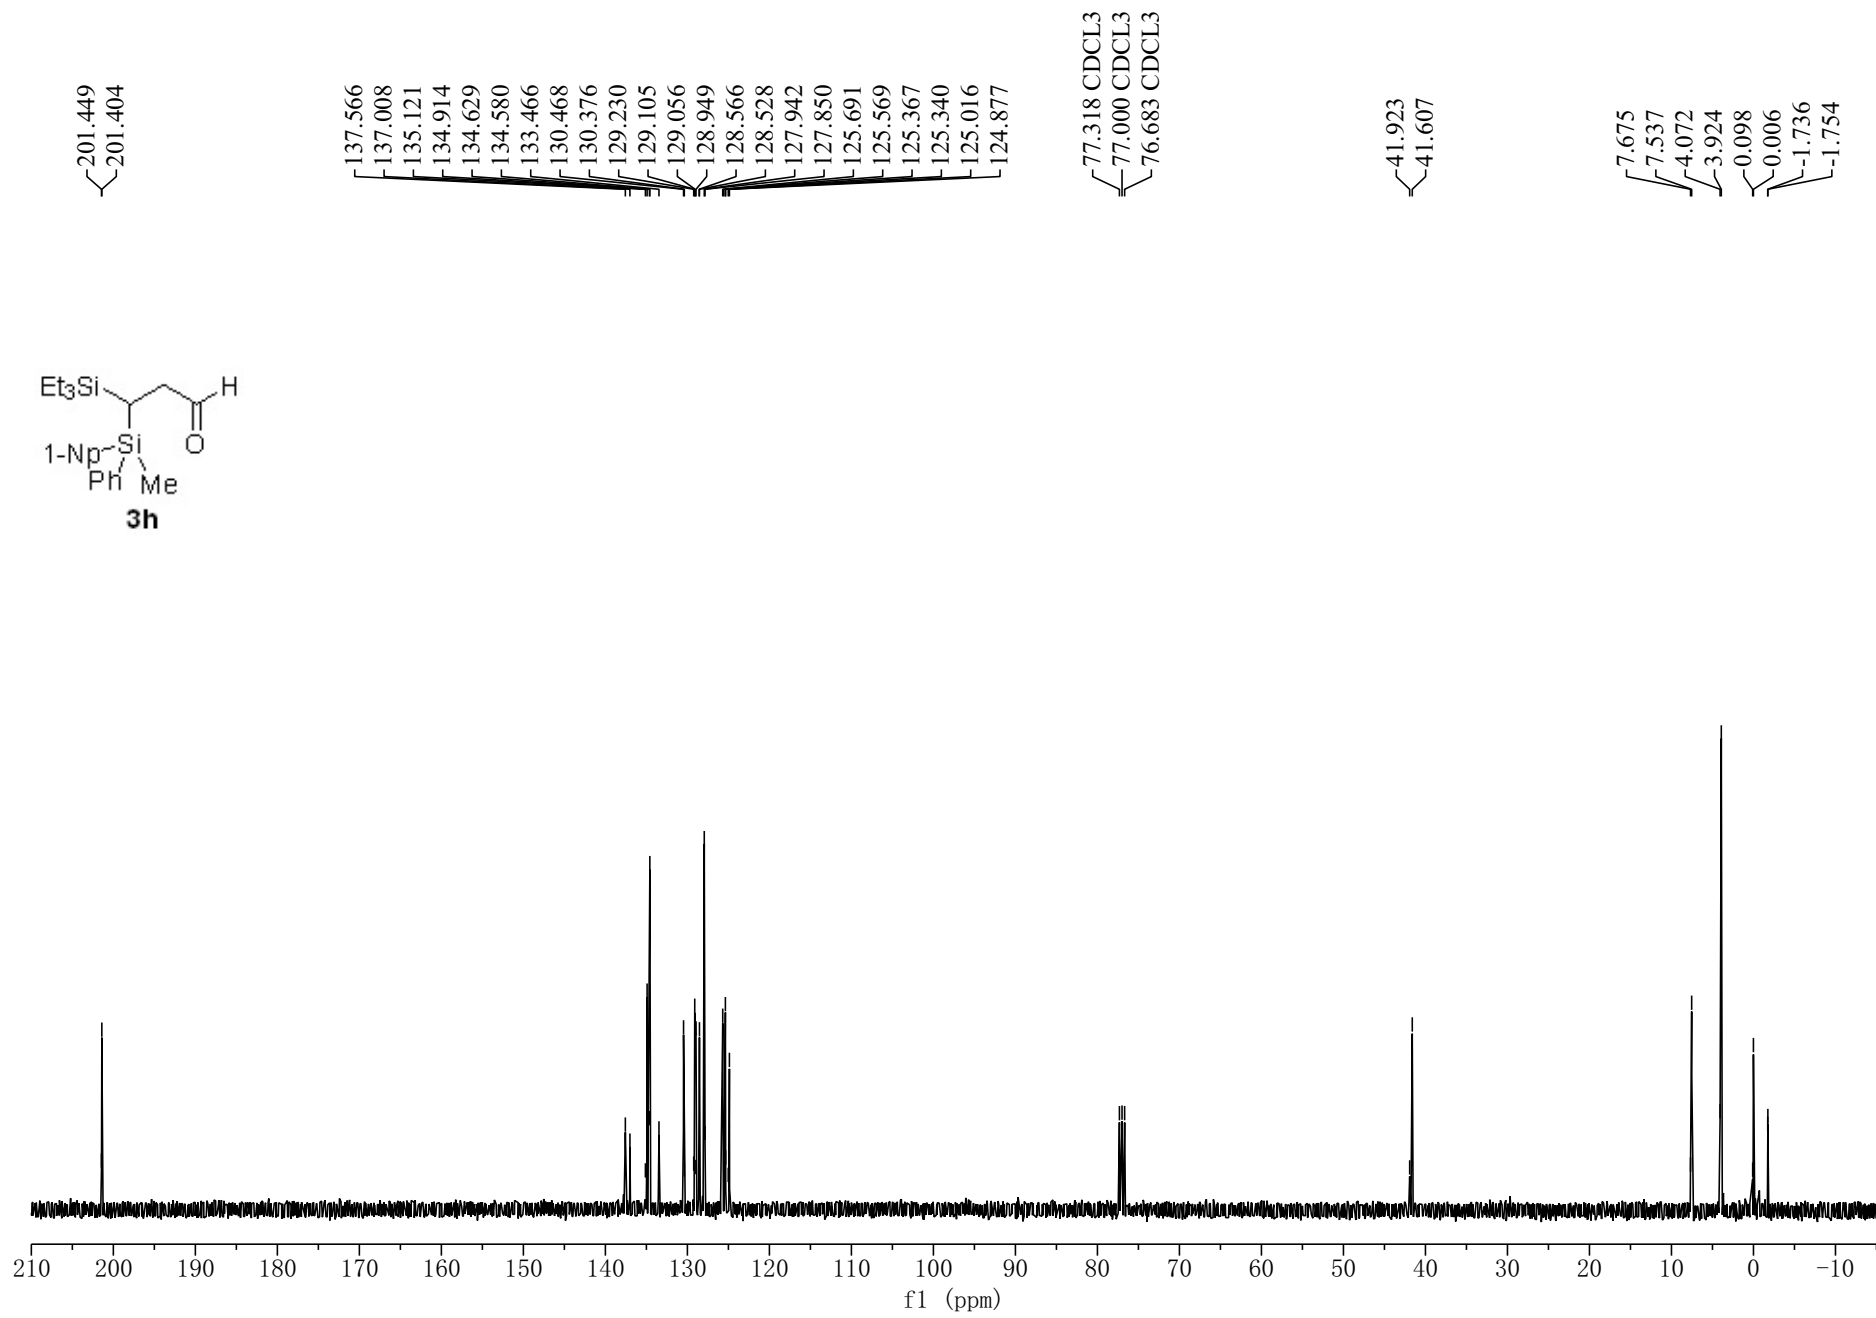

CH-1-21 H1 CDCl3 400M Hz

9.724  
9.656

8.017  
7.997  
7.894  
7.873  
7.853  
7.836  
7.817  
7.778  
7.762  
7.558  
7.541  
7.481  
7.463  
7.337  
7.323

2.868  
2.860  
2.820  
2.811  
2.798  
2.778  
2.748  
2.728  
1.794  
1.785  
1.775  
1.766  
1.639  
1.623  
1.611  
-0.792

-0.144  
-0.242

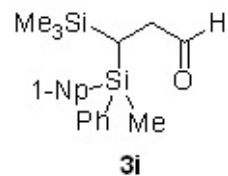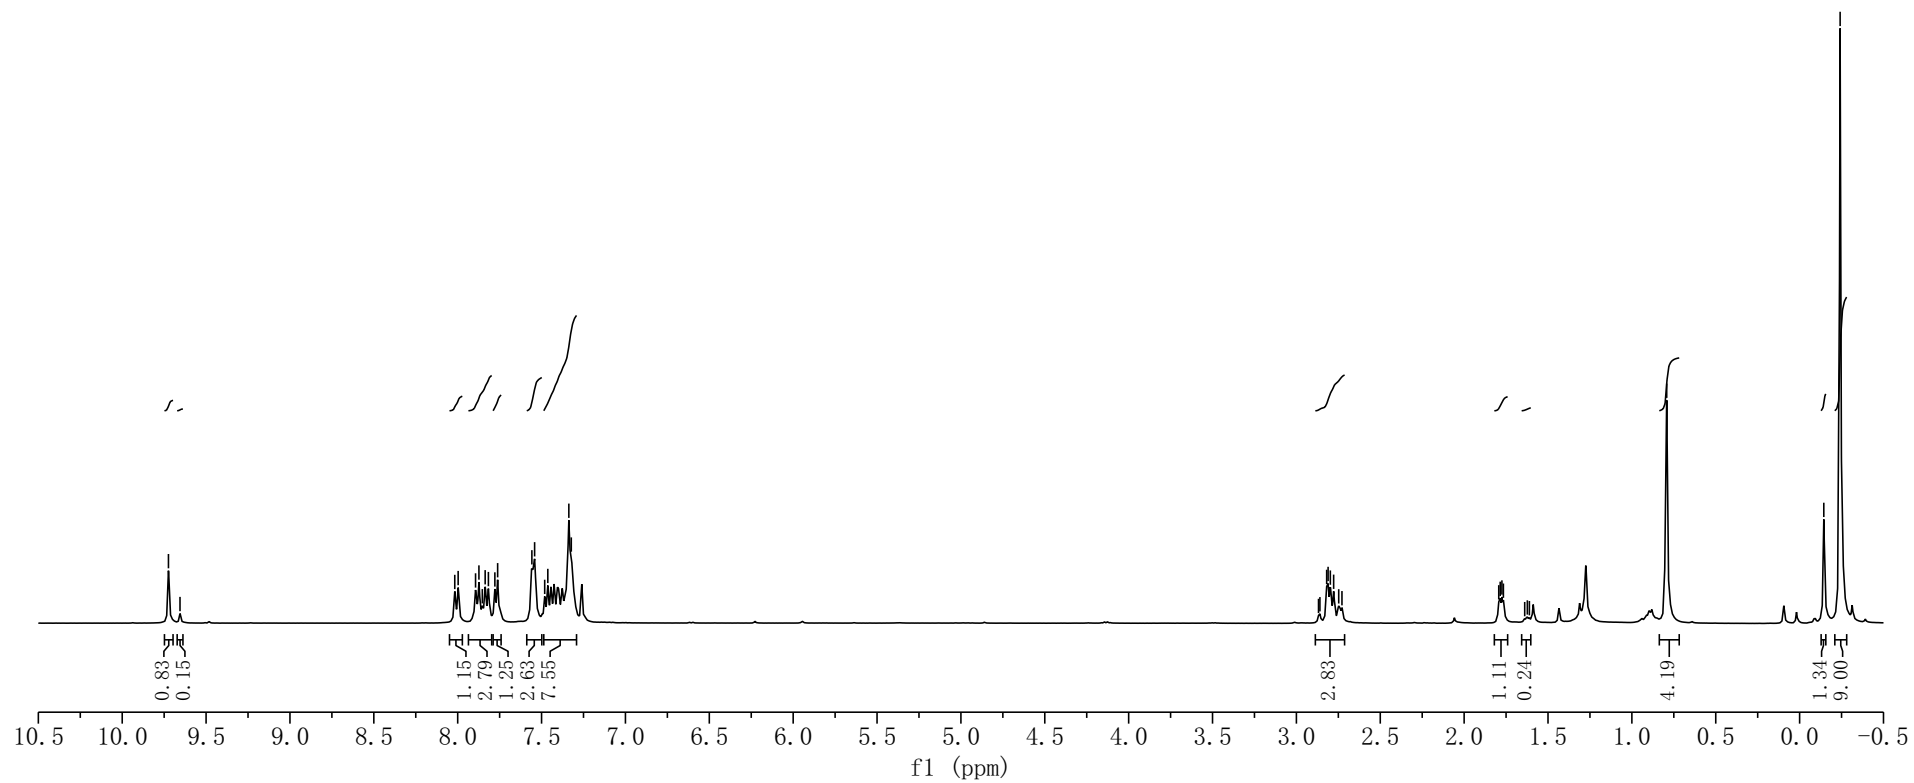

CH-1-21 C13 CDCI3 150M Hz

201.569  
201.513

137.380  
137.057  
134.991  
134.928  
134.872  
134.598  
134.483  
133.511  
133.431  
130.454  
130.392  
129.207  
129.130  
129.019  
128.938  
128.468  
128.391  
127.977  
127.882  
125.759  
125.604  
125.380  
125.365  
124.999  
124.874

77.211 cdcl3  
77.000 cdcl3  
76.788 cdcl3

41.949  
41.609

3.603  
3.376  
-0.194  
-0.388  
-1.097  
-2.105

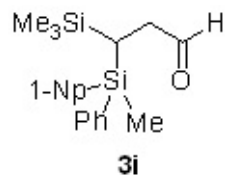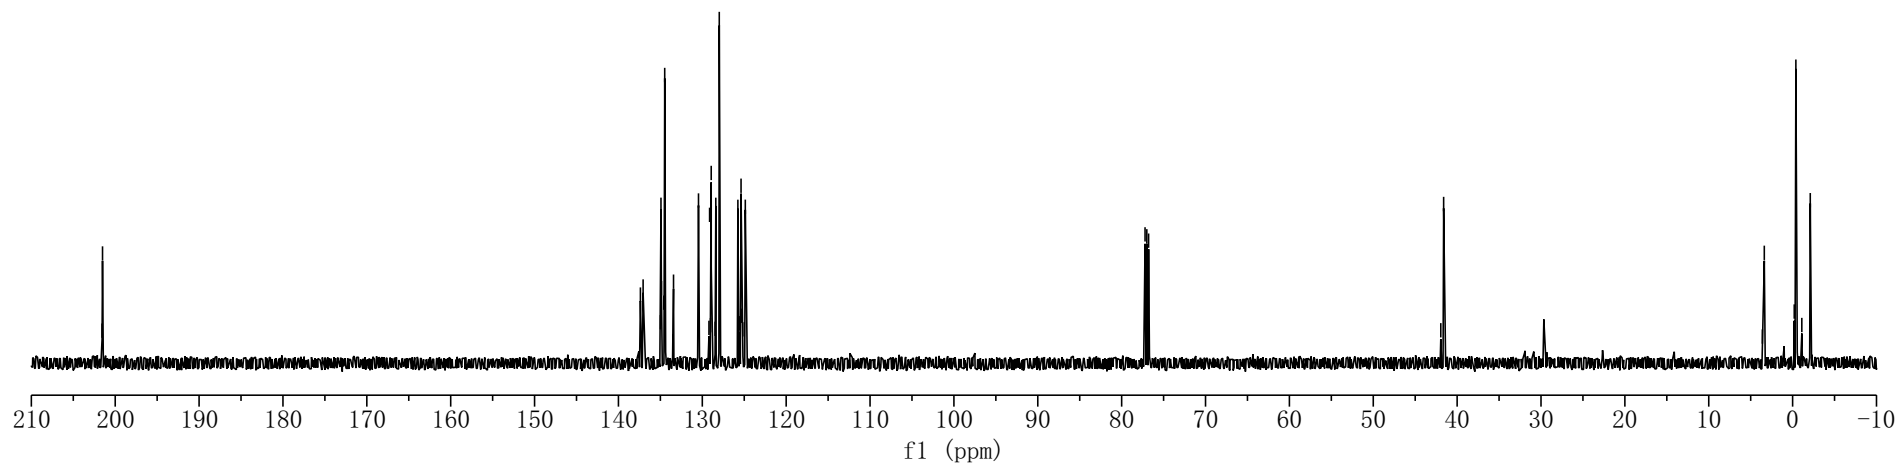

WY-7-43A H1 CDCl3 400M Hz

7.420  
7.402  
7.298  
7.279  
7.260  
7.221  
7.196  
7.177  
7.158  
7.041  
7.023  
7.004  
6.173  
6.159

4.671  
4.657  
4.640  
4.626

3.411  
3.380

1.064  
1.044  
1.025  
0.873  
0.767  
0.747  
0.727  
0.708

—0.025

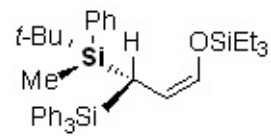

4a

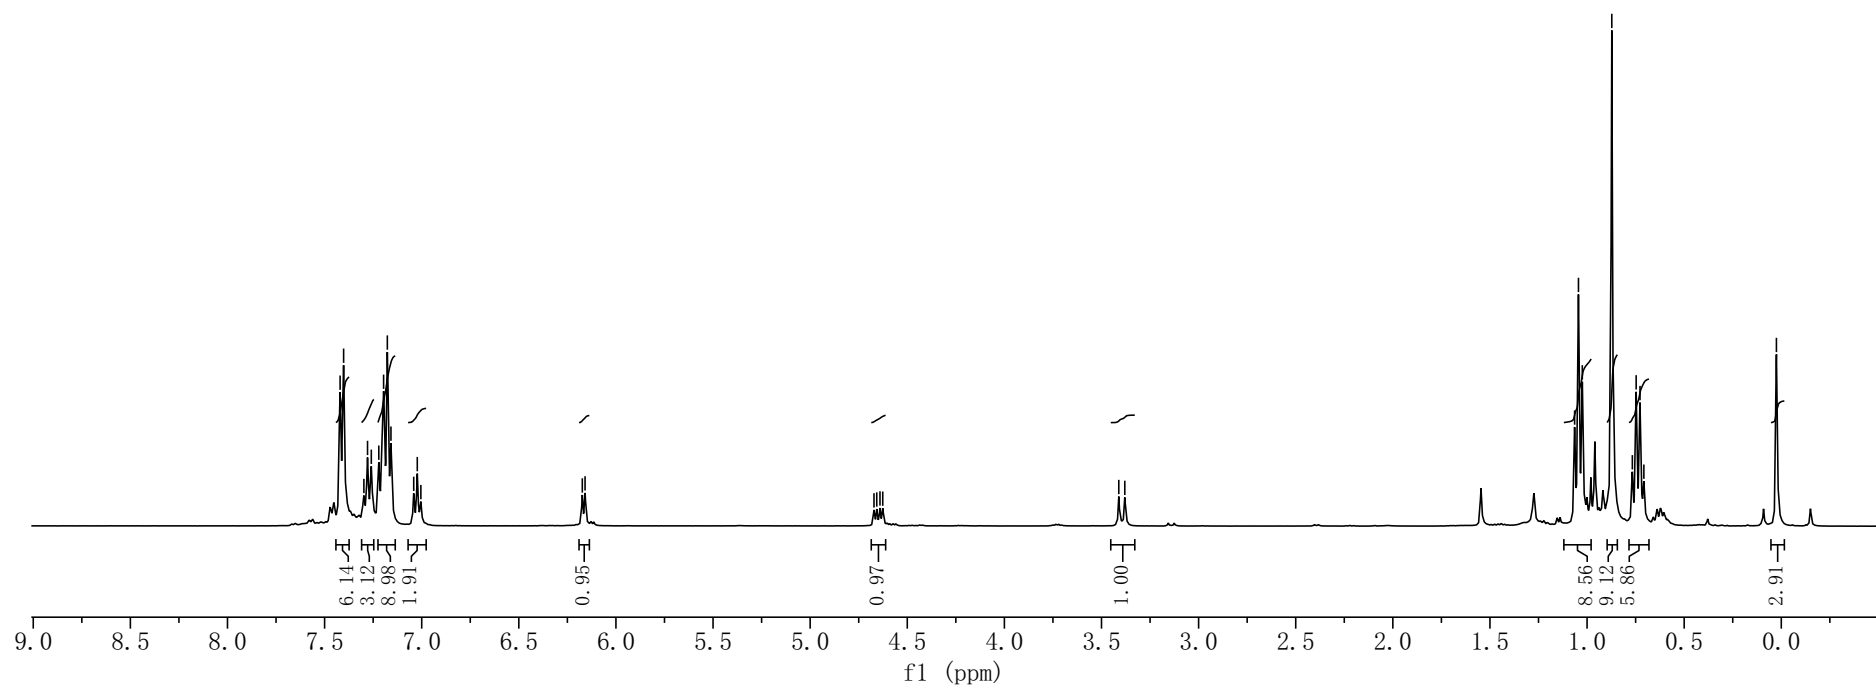

WY-7-43A C13 CDCI3 150M Hz

137.264  
136.097  
136.067  
135.722  
134.941  
128.656  
128.102  
127.260  
127.176  
126.771  
—107.146

77.211 cdcl3  
77.000 cdcl3  
76.788 cdcl3

—27.425  
—19.309  
7.816  
6.673  
4.679  
—-7.363

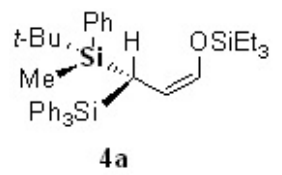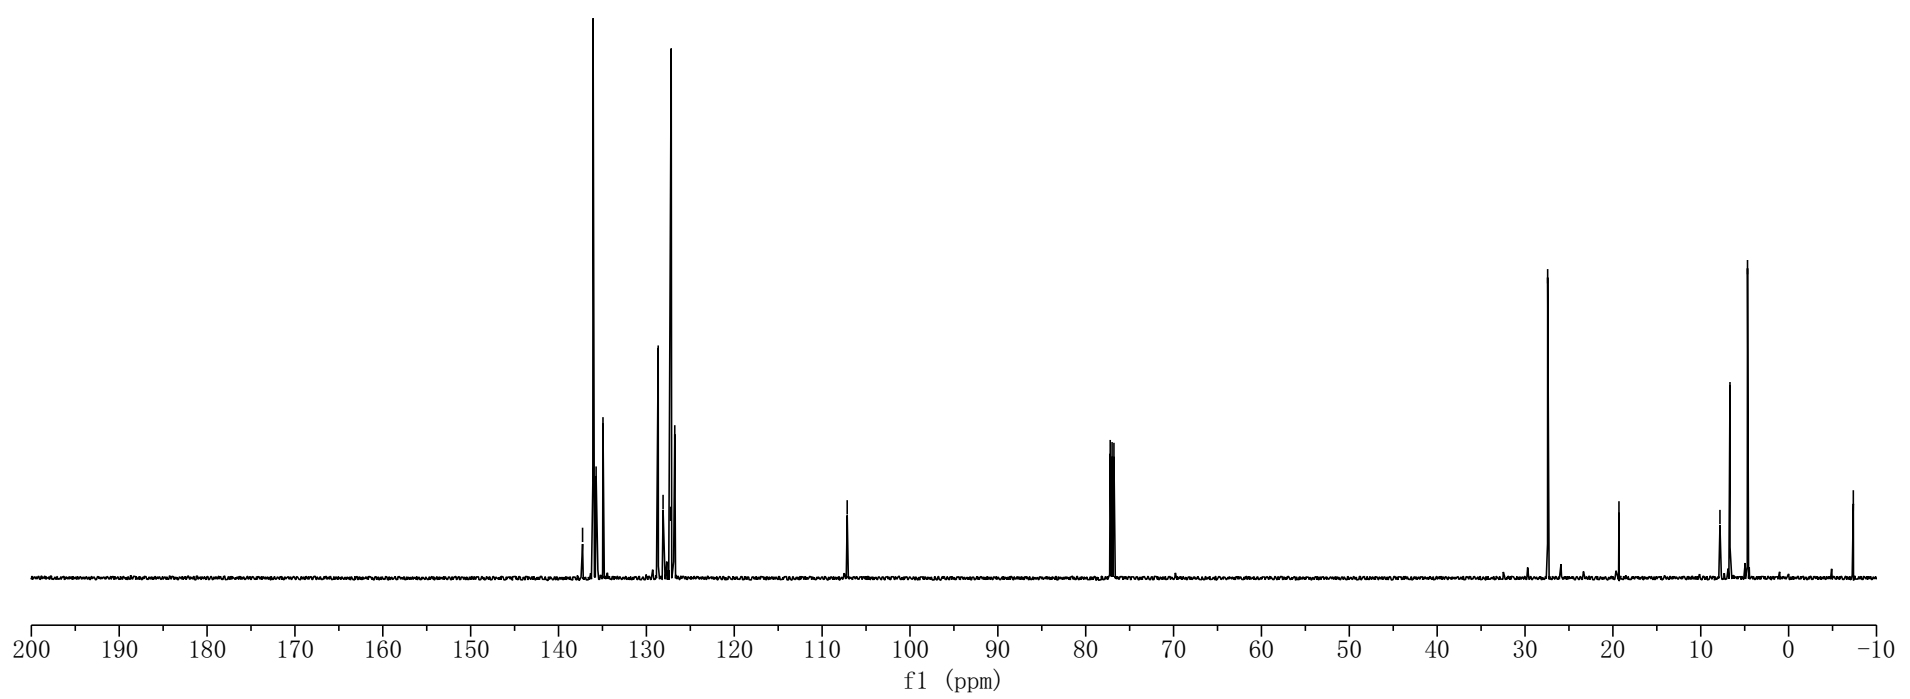

WY-7-51-3 H1 CDCl3 400M Hz

8.191  
8.172  
7.690  
7.672  
7.654  
7.584  
7.565  
7.547  
7.412  
7.393  
7.256  
7.241  
7.216  
7.191  
7.149  
7.130  
7.112  
7.083  
7.065  
7.046  
5.333  
5.317  
5.300  
5.285

3.467  
3.434

0.861

0.148

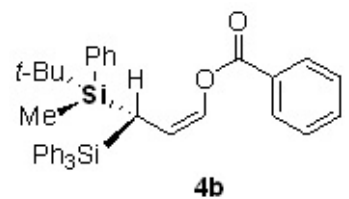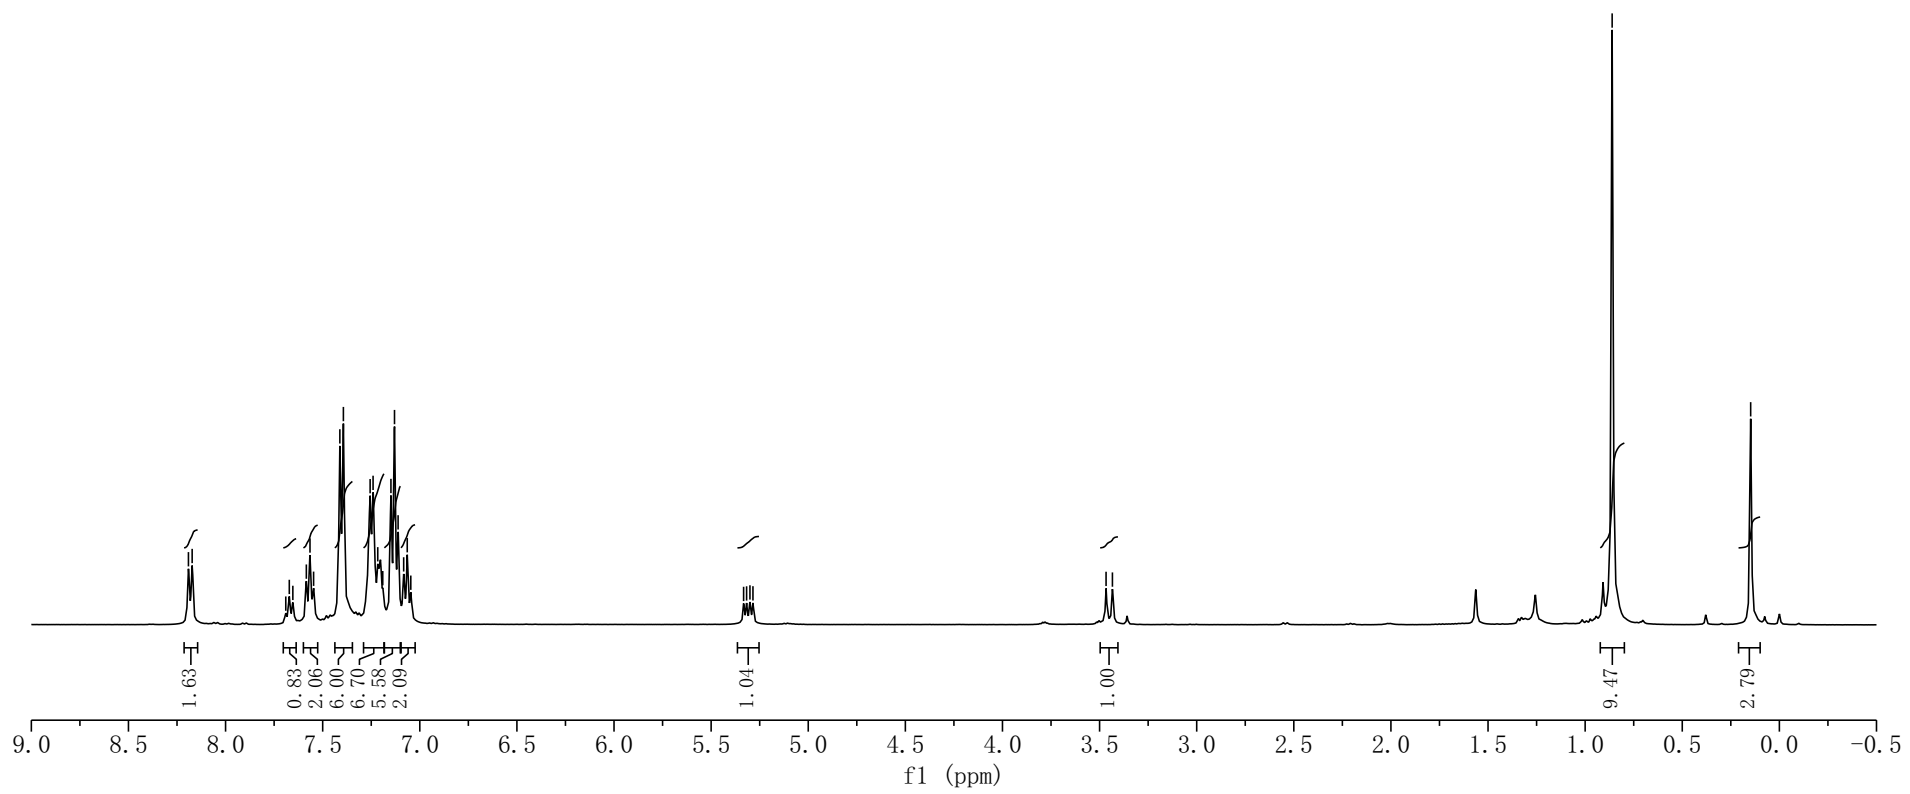

WY-7-51-3 C13 CDCI3 150M Hz

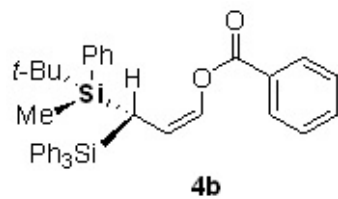

163.181  
136.686  
136.008  
134.706  
134.470  
133.419  
132.388  
129.787  
129.580  
129.070  
128.677  
128.512  
127.376  
127.127  
113.595

77.212 cdcl3  
77.000 cdcl3  
76.788 cdcl3

27.270

19.396

11.639

7.153

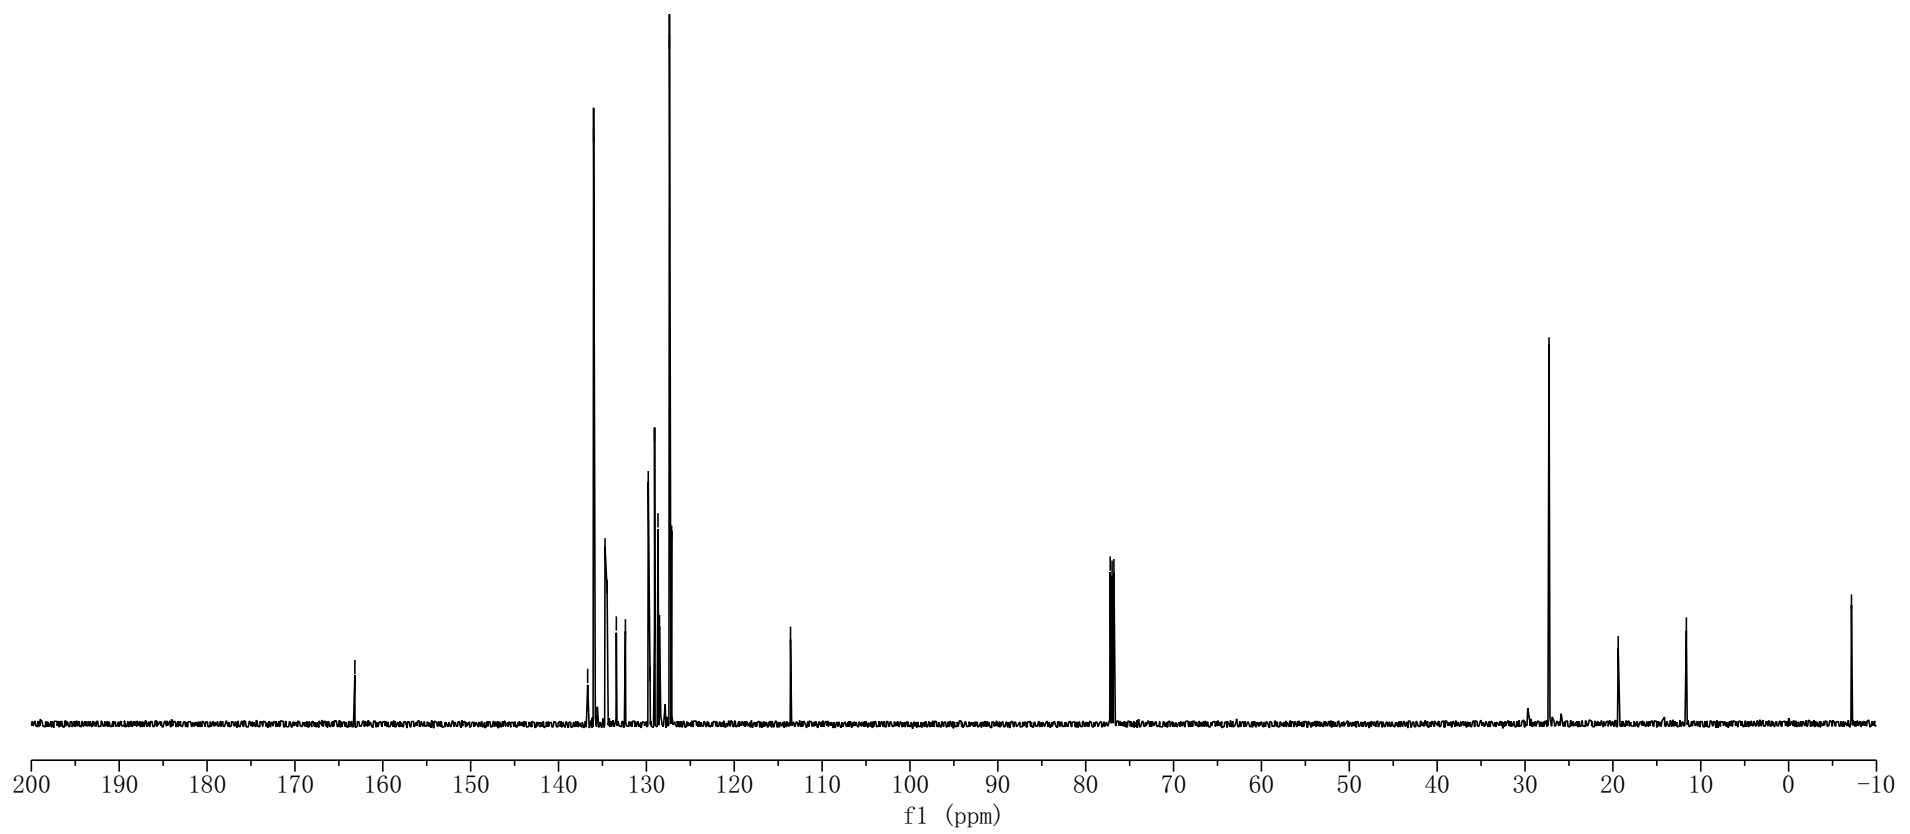



WY-7-44 H1 CDCl3 400M Hz

8.003  
7.982  
7.716  
7.695  
7.395  
7.377  
7.280  
7.243  
7.205  
7.181  
7.165  
7.135  
7.116  
7.093  
7.074  
7.055

5.366  
5.351  
5.333  
5.318

3.399  
3.366

—0.853

—0.153

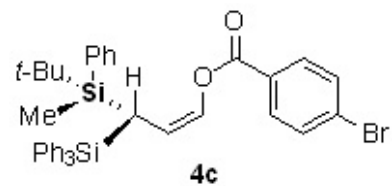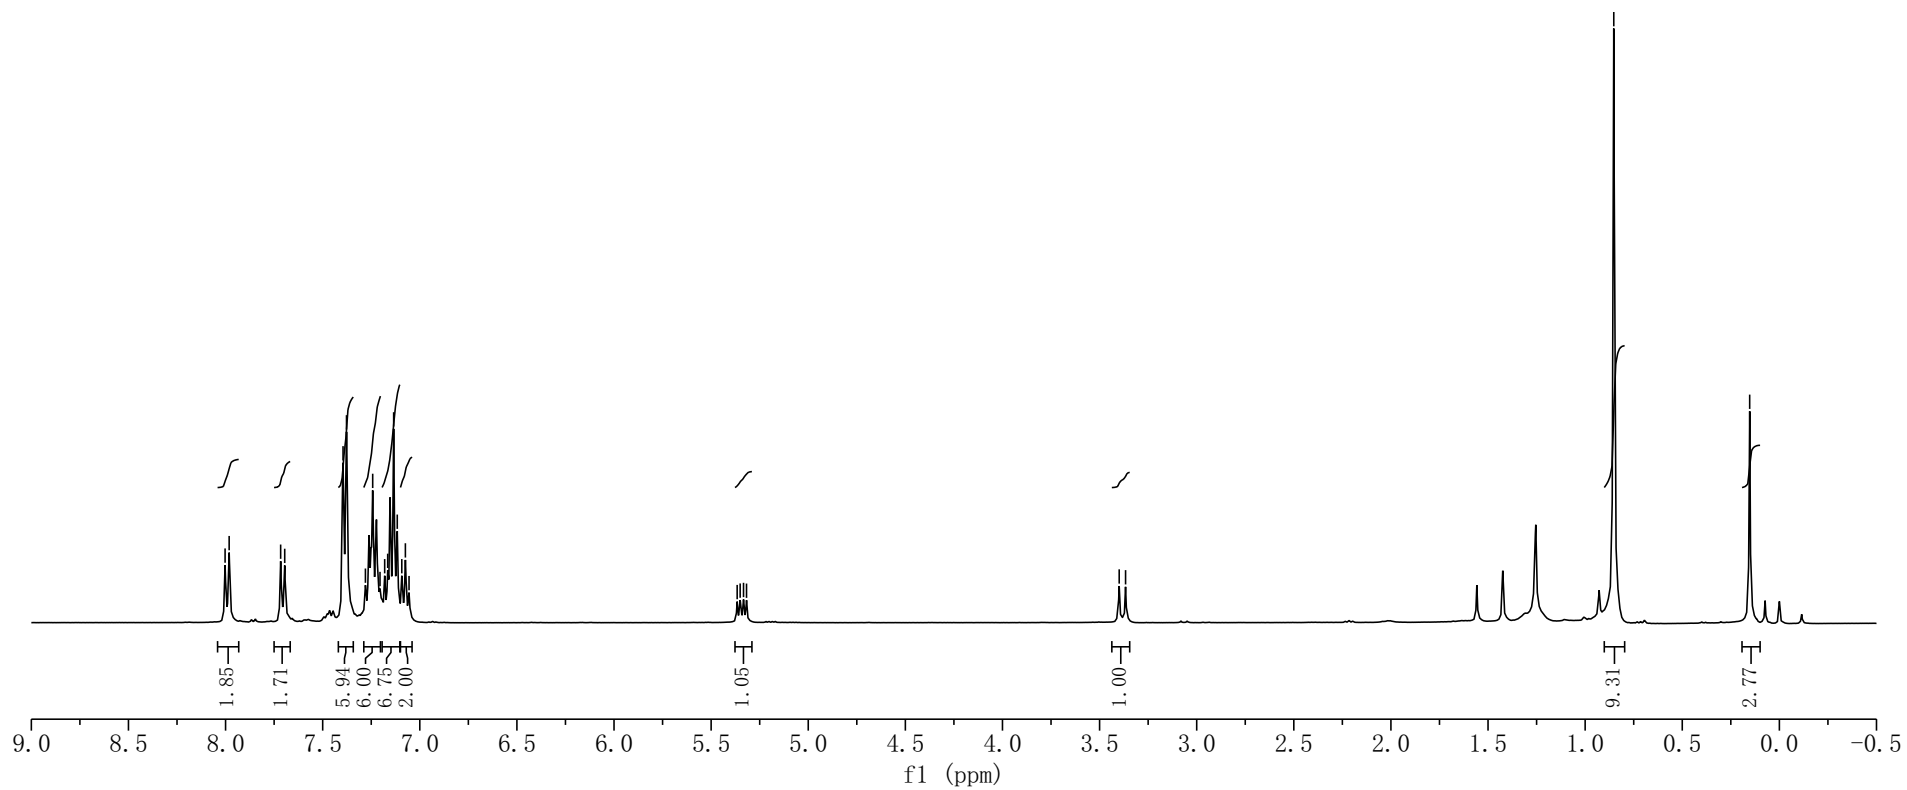

WY-7-44 C13 CDCI3 150M Hz

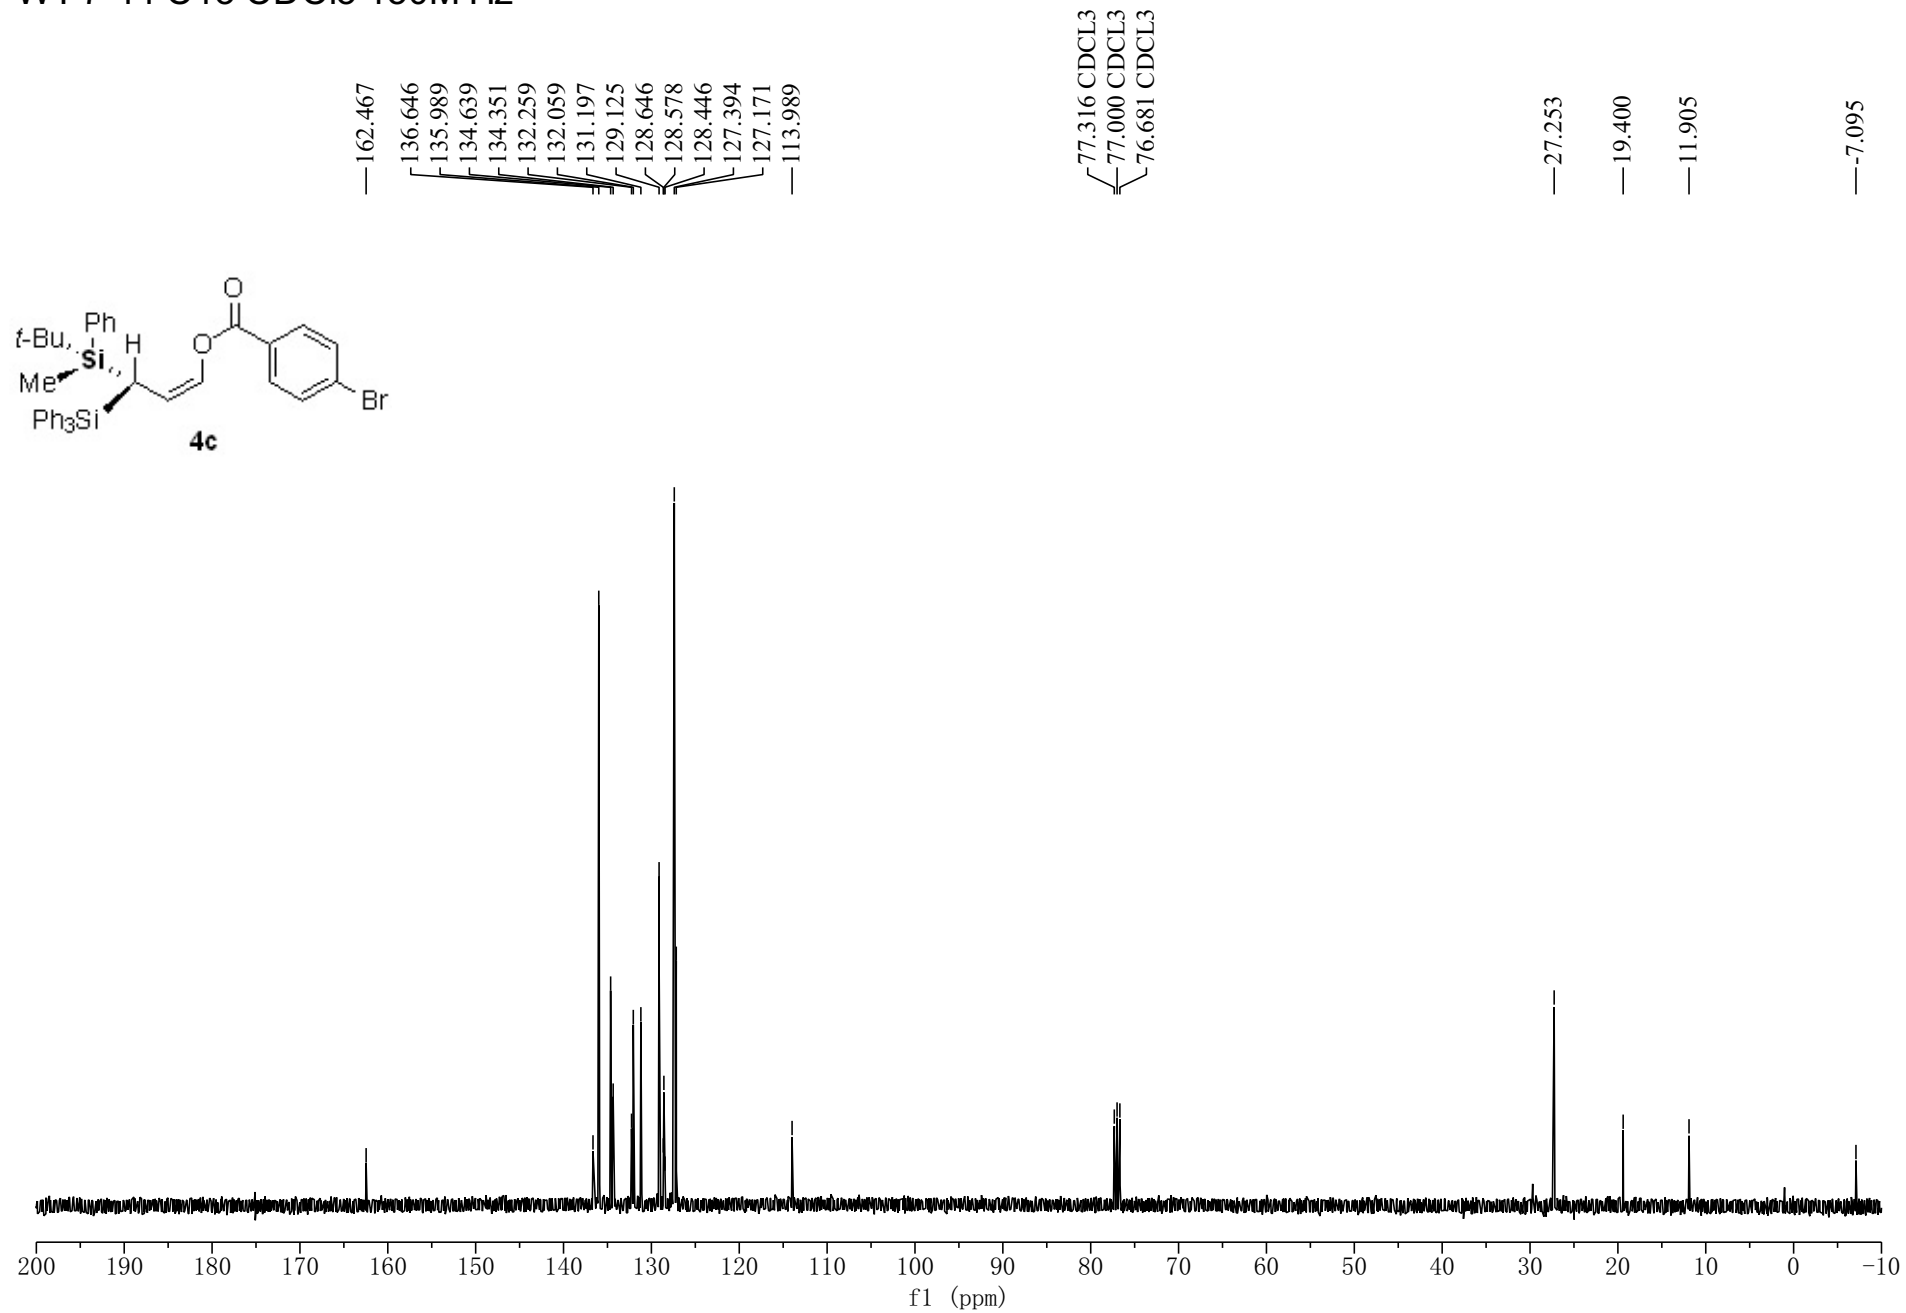

WY-7-109-1 H1 CDCI3 400M Hz

8.411  
8.389  
8.251  
8.229  
7.394  
7.376  
7.283  
7.264  
7.259  
7.247  
7.230  
7.205  
7.190  
7.158  
7.139  
7.120  
7.110  
7.091  
7.072  
5.472  
5.457  
5.439  
5.424

3.375  
3.342

0.867

0.174

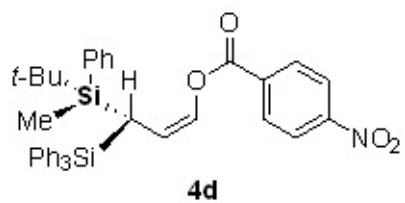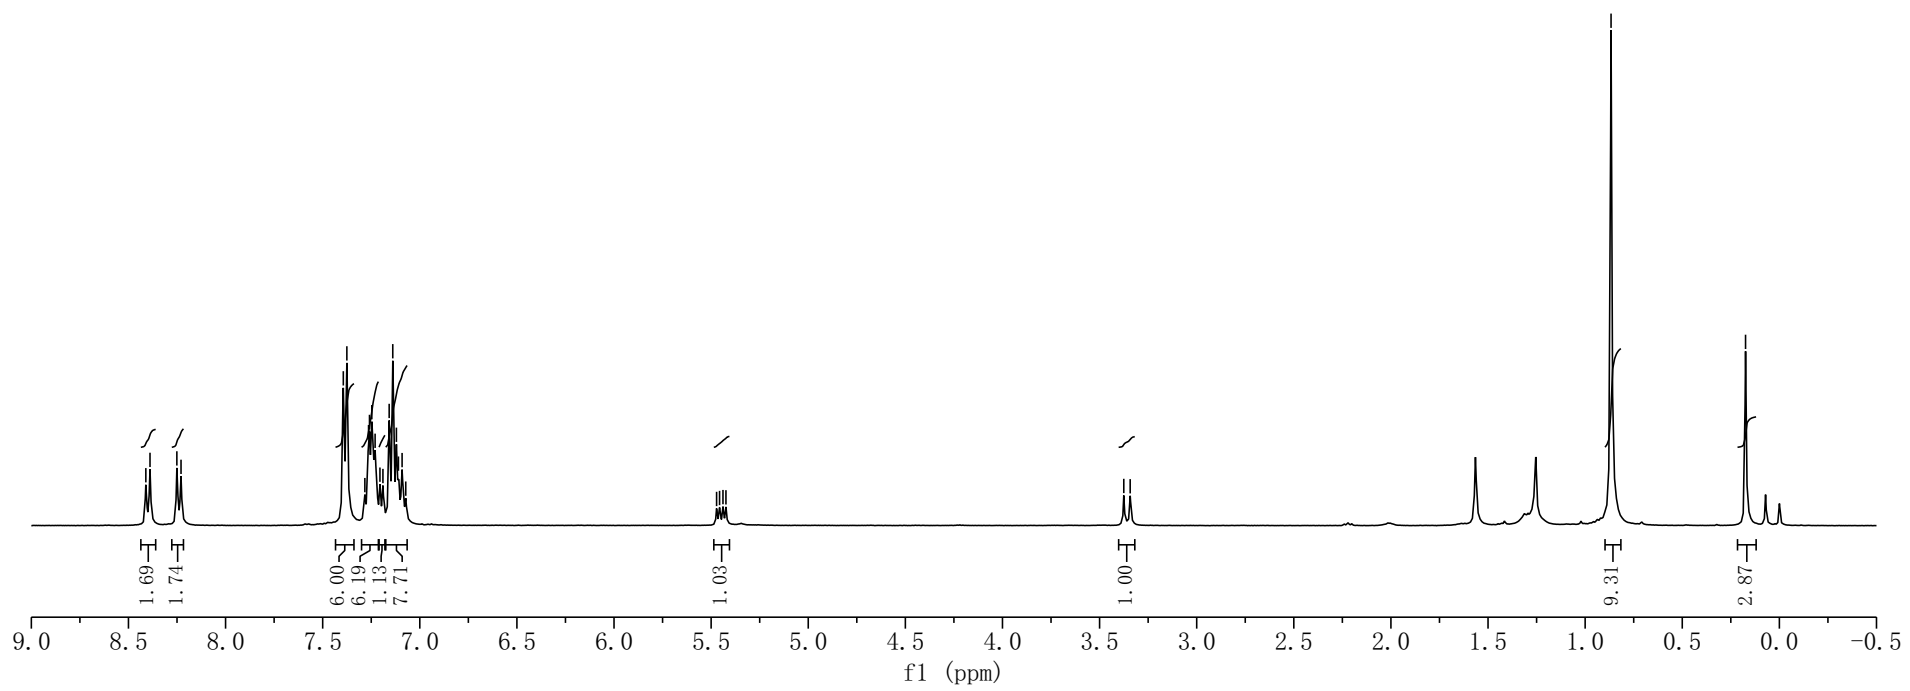

WY-7-109-1 C13 CDCI3 150M Hz

161.302  
150.733  
136.583  
135.994  
134.910  
134.590  
134.197  
132.177  
130.767  
129.214  
128.697  
127.433  
127.248  
123.818  
115.012

77.212 cdcl3  
77.000 cdcl3  
76.788 cdcl3

27.280  
19.433  
12.449  
-7.022

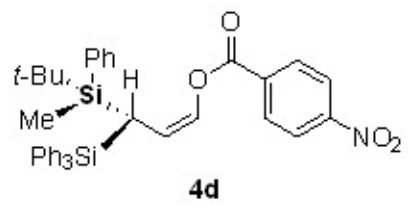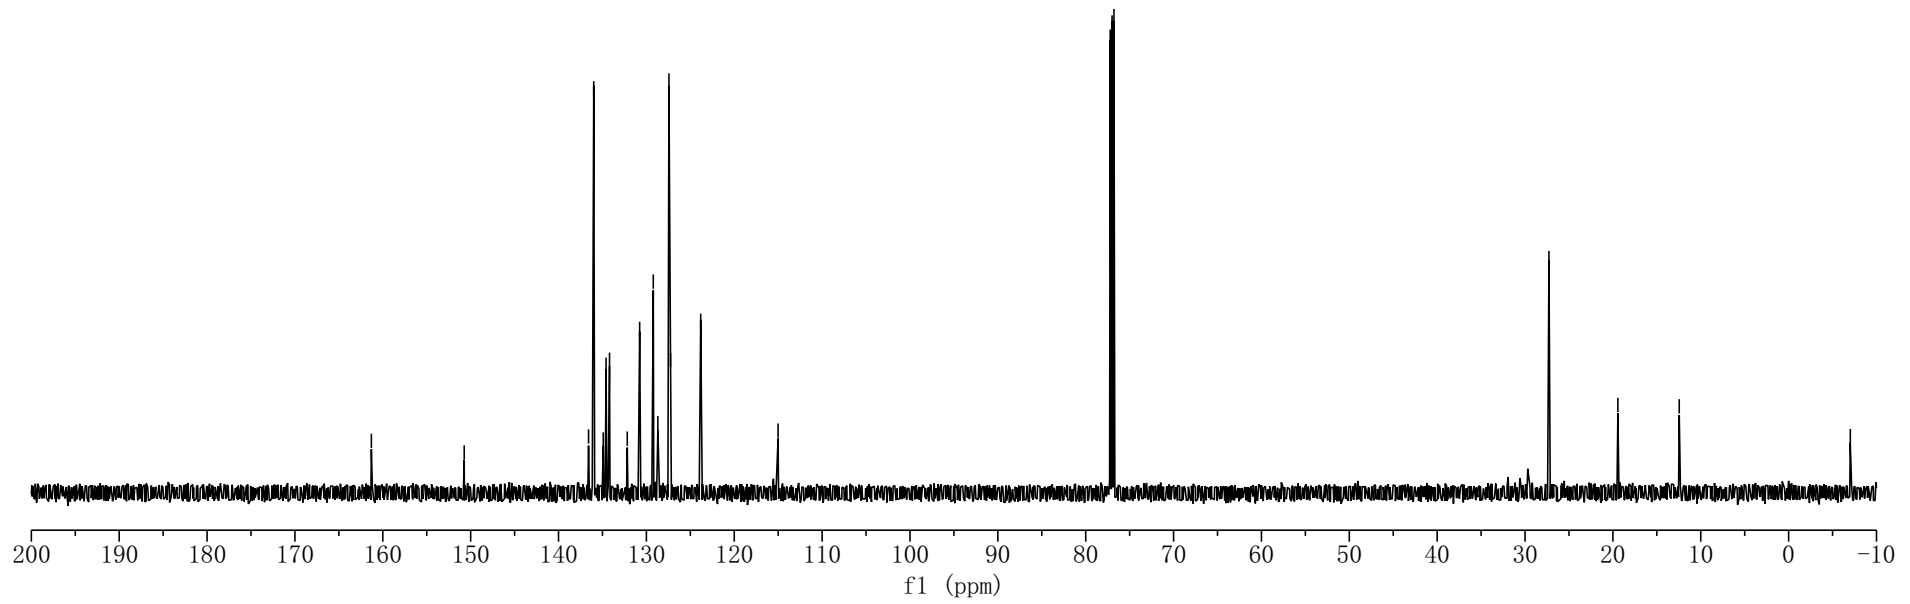

WY-7-108-1 H1 CDCl3 400M Hz

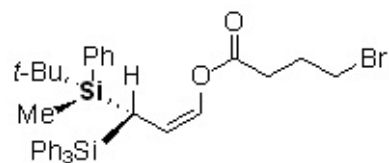

4e

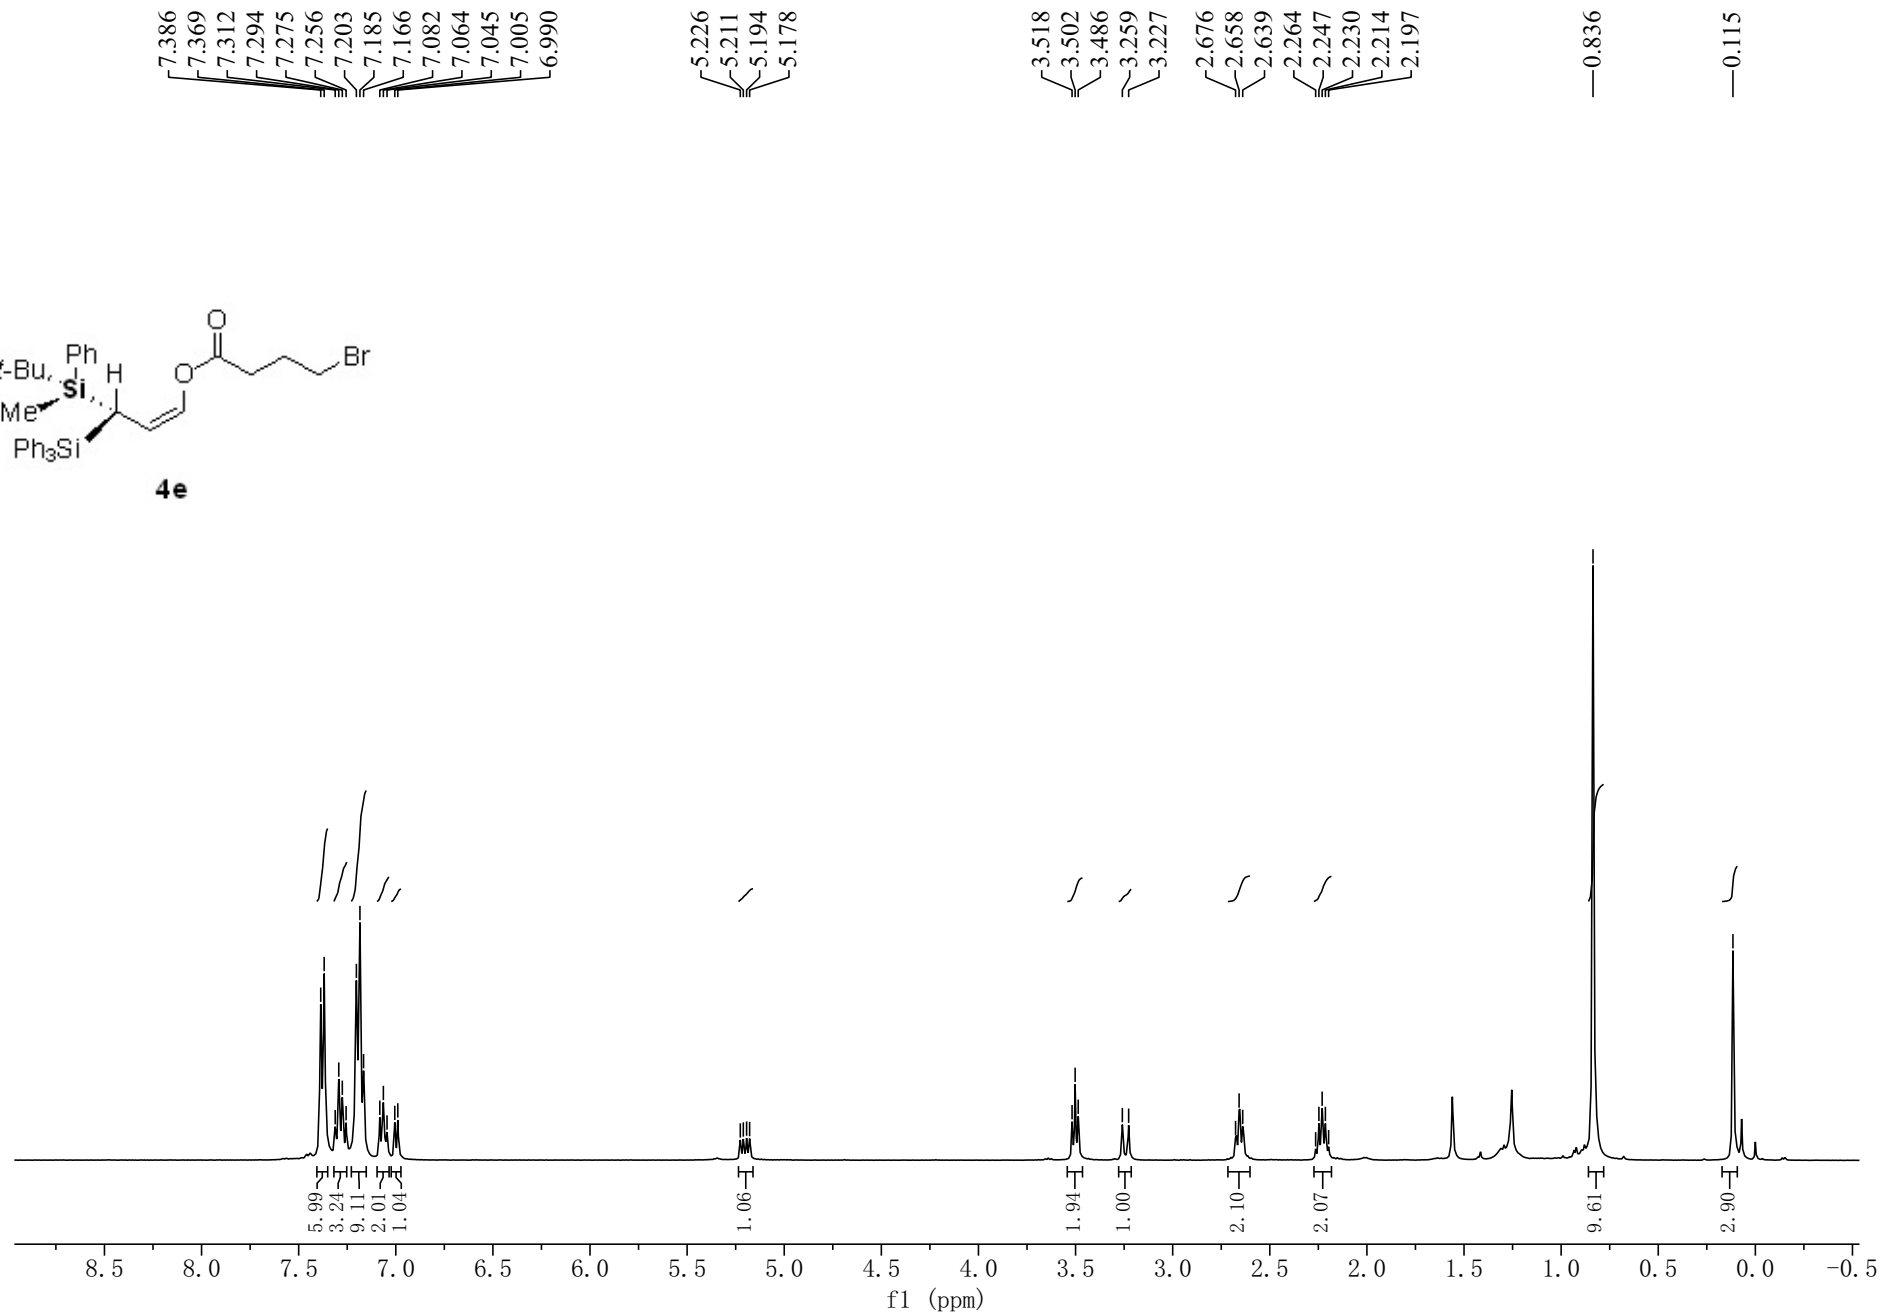

WY-7-108-1 C13 CDCI3 150M Hz

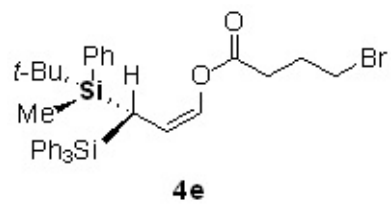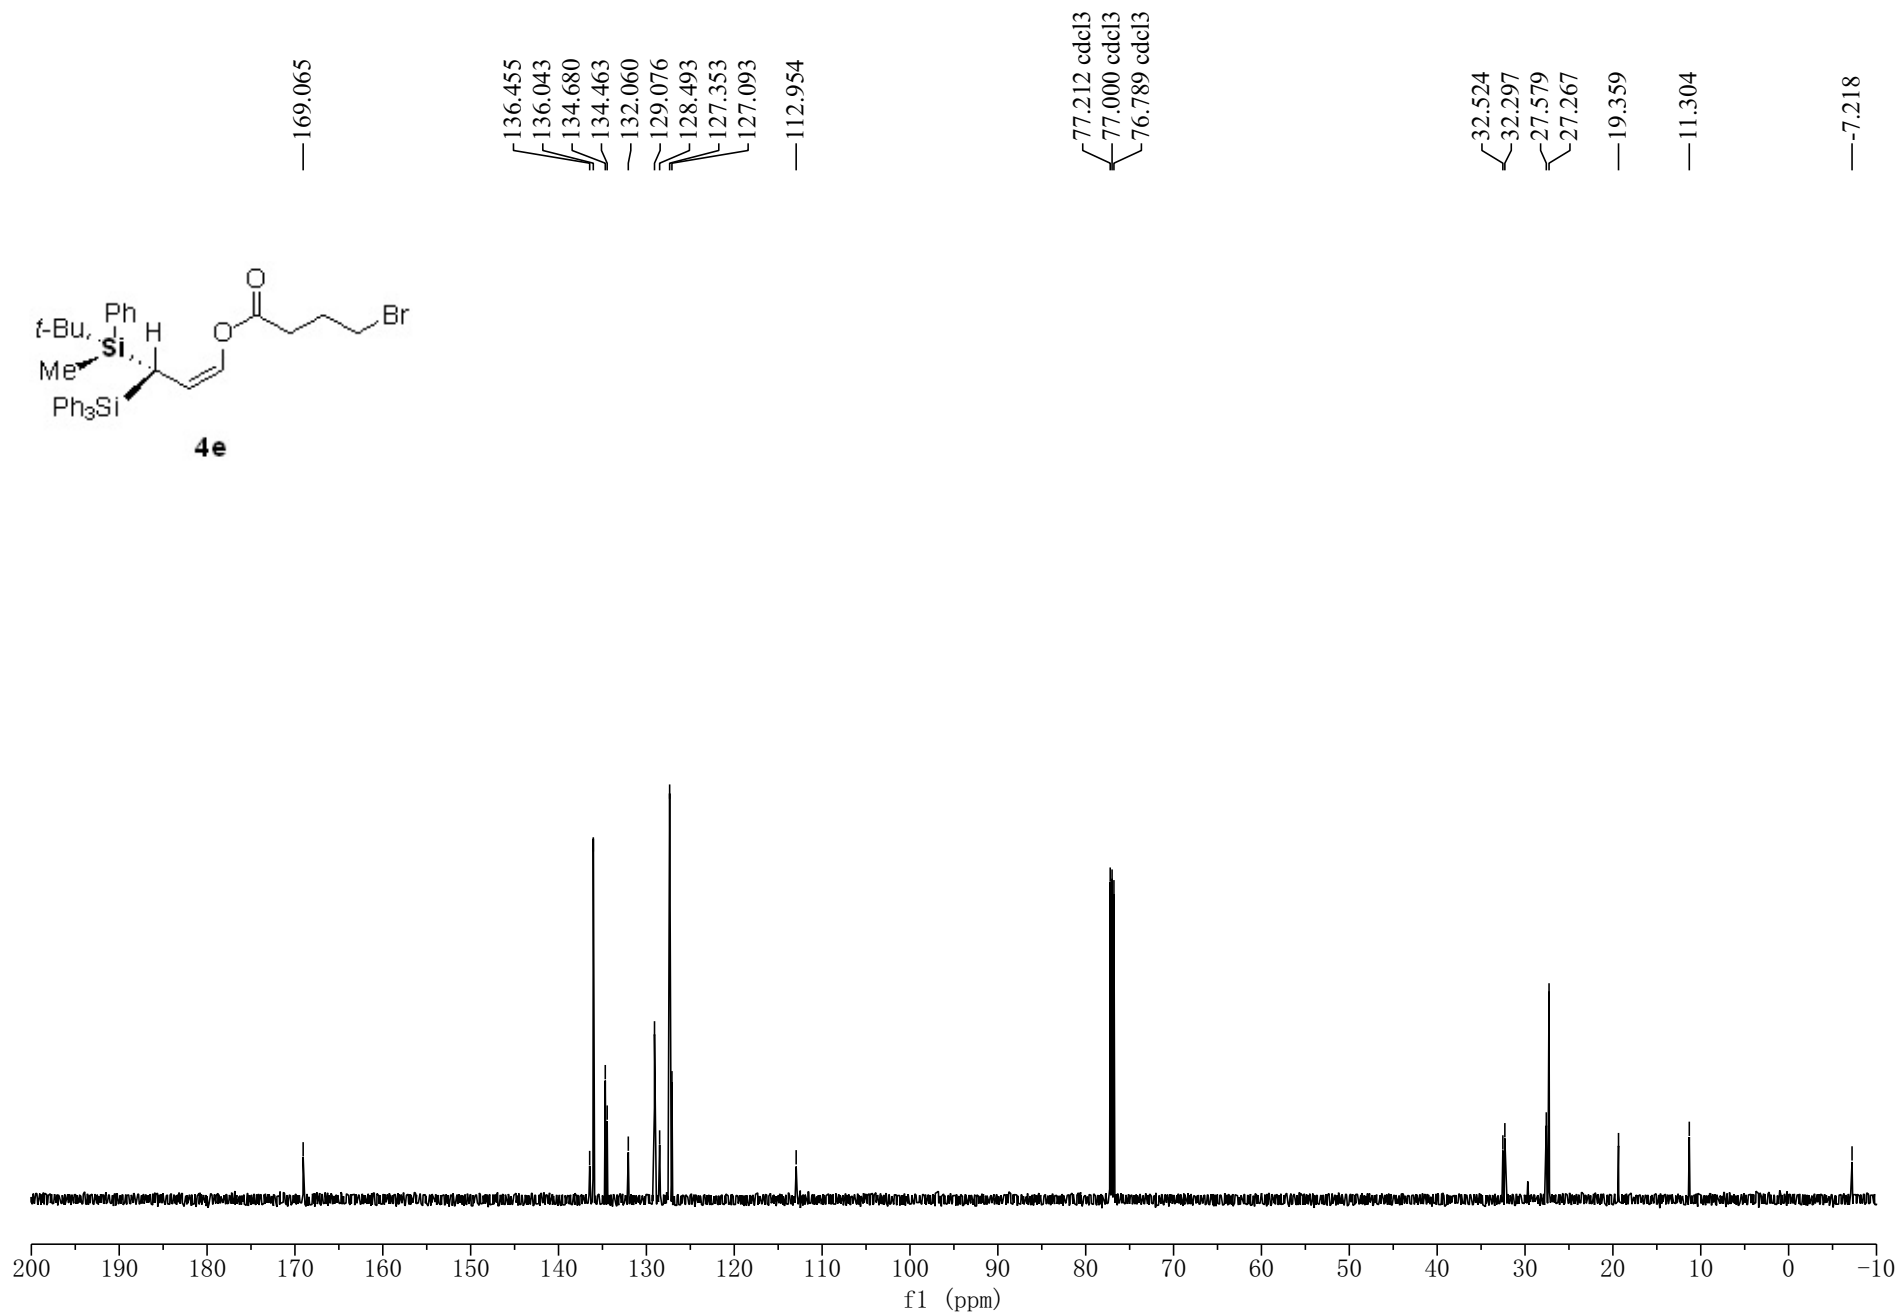

WY-7-74-2B-2 H1 CDCl3 400M Hz

7.383  
7.365  
7.306  
7.288  
7.249  
7.194  
7.176  
7.157  
7.068  
7.050  
7.031  
7.015  
6.999  
5.947  
5.931  
5.916  
5.905  
5.889  
5.878  
5.863  
5.847  
5.191  
5.175  
5.159  
5.143  
5.121  
5.093  
5.068

3.278  
3.245  
2.598  
2.570  
2.554  
2.495  
2.478  
2.444

—0.832

—0.098

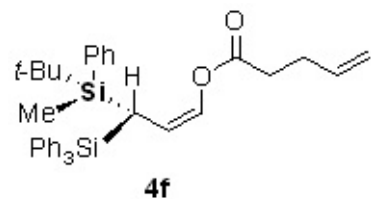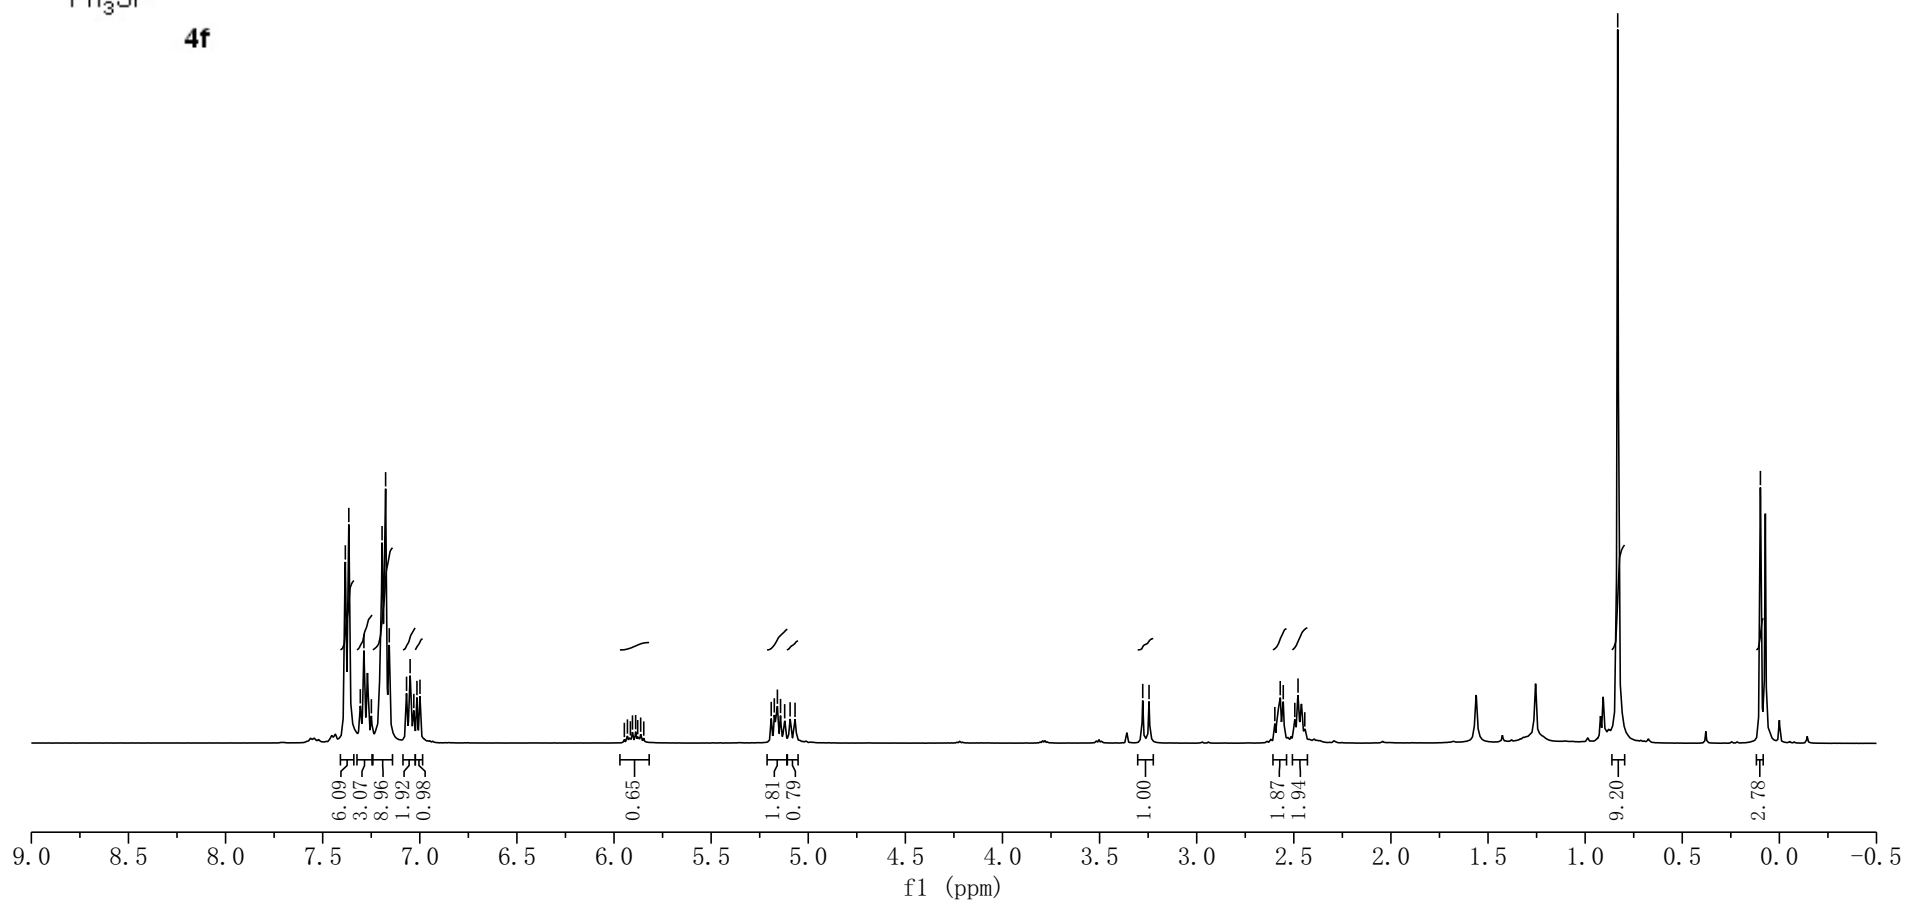

WY-7-74-2B-2 C13 CDCI3 150M Hz

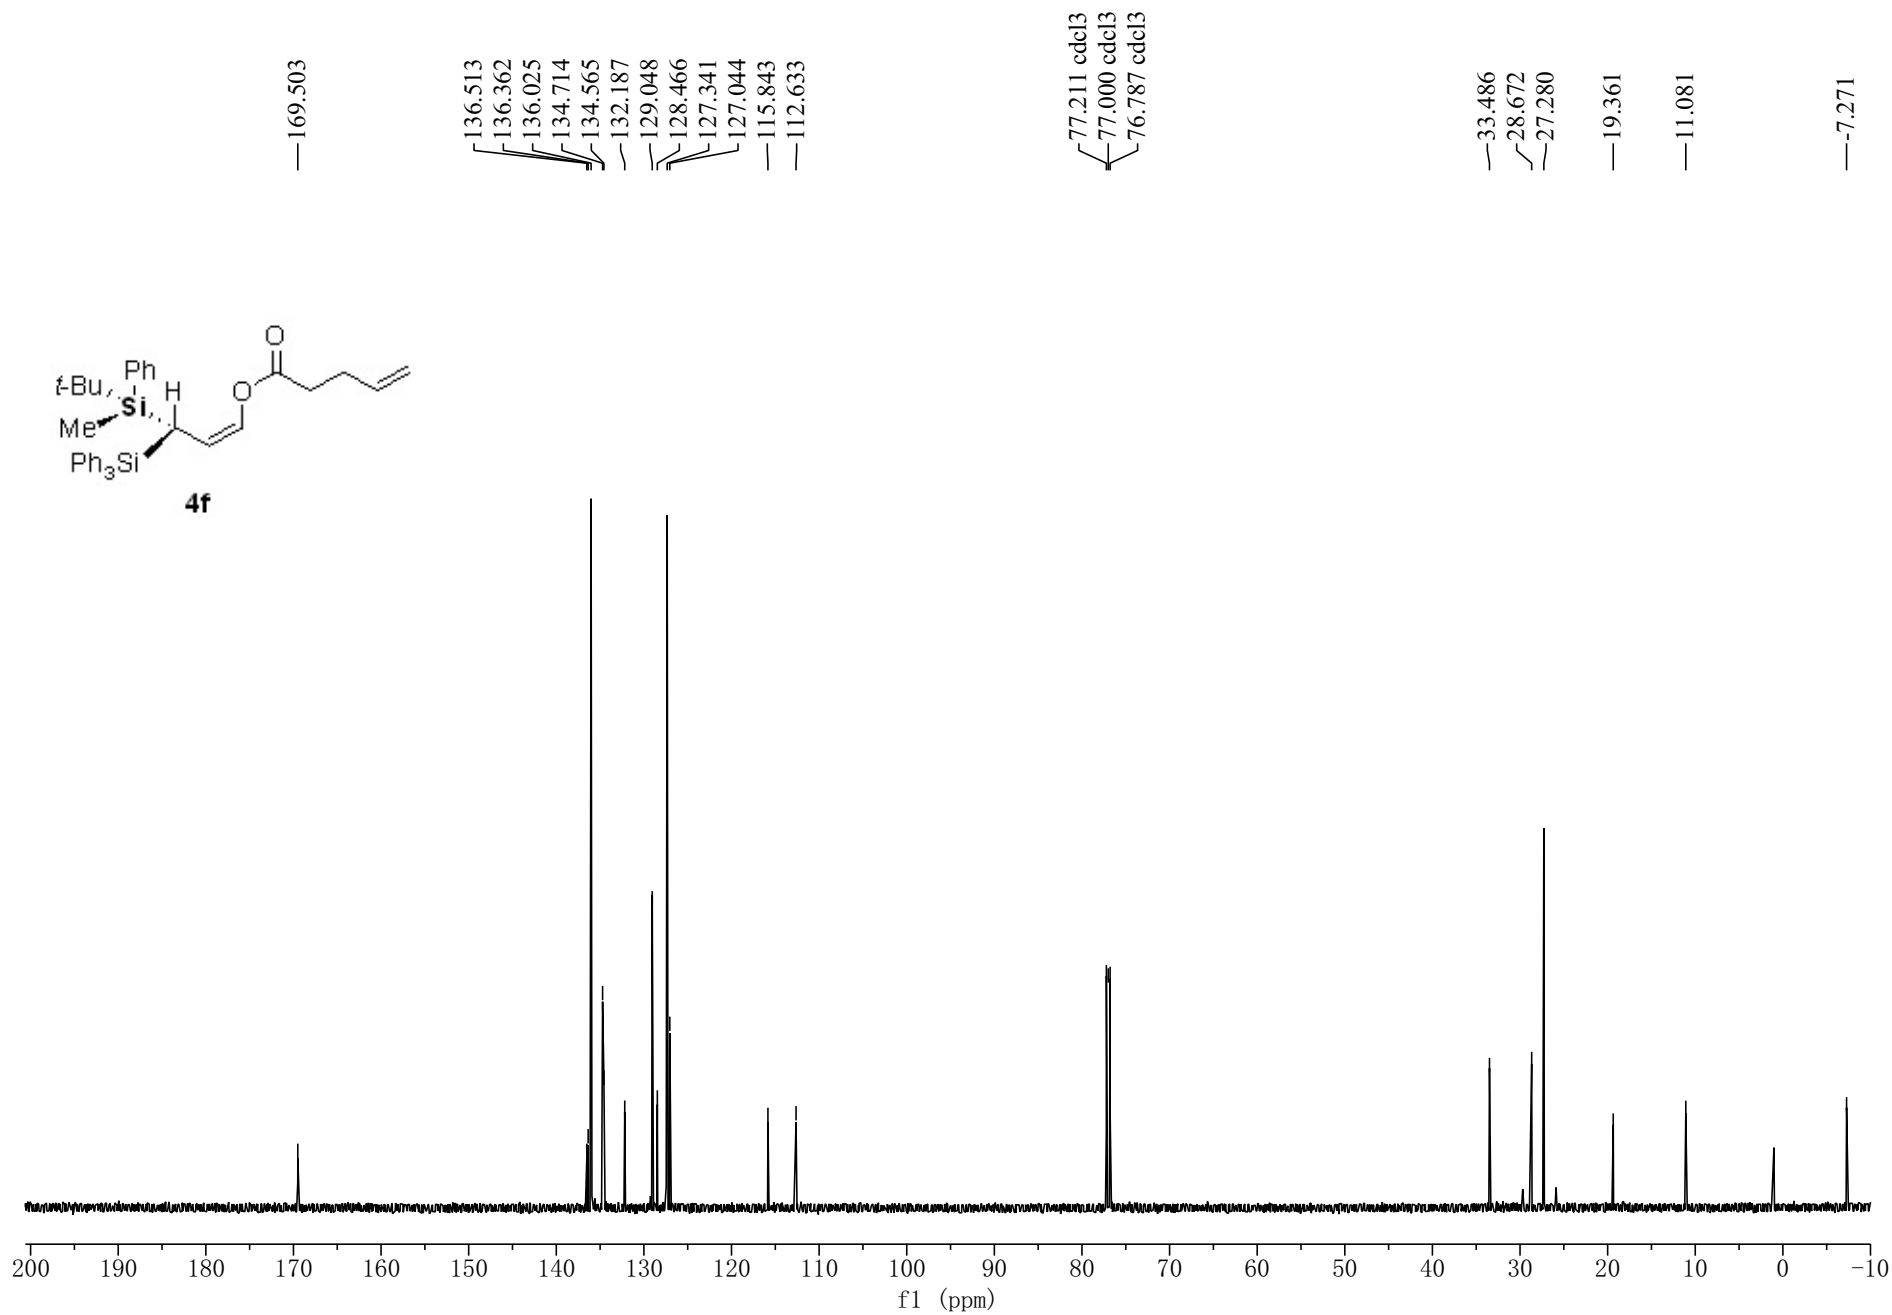



WY-7-45B-1 H1 CDCl3 400M Hz

7.371  
7.353  
7.304  
7.286  
7.268  
7.238  
7.218  
7.190  
7.172  
7.153  
7.062  
7.044  
7.021  
7.004

5.194  
5.179  
5.162  
5.146

3.300  
3.267

1.335

0.842

0.100

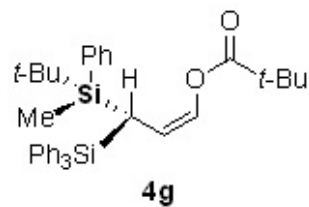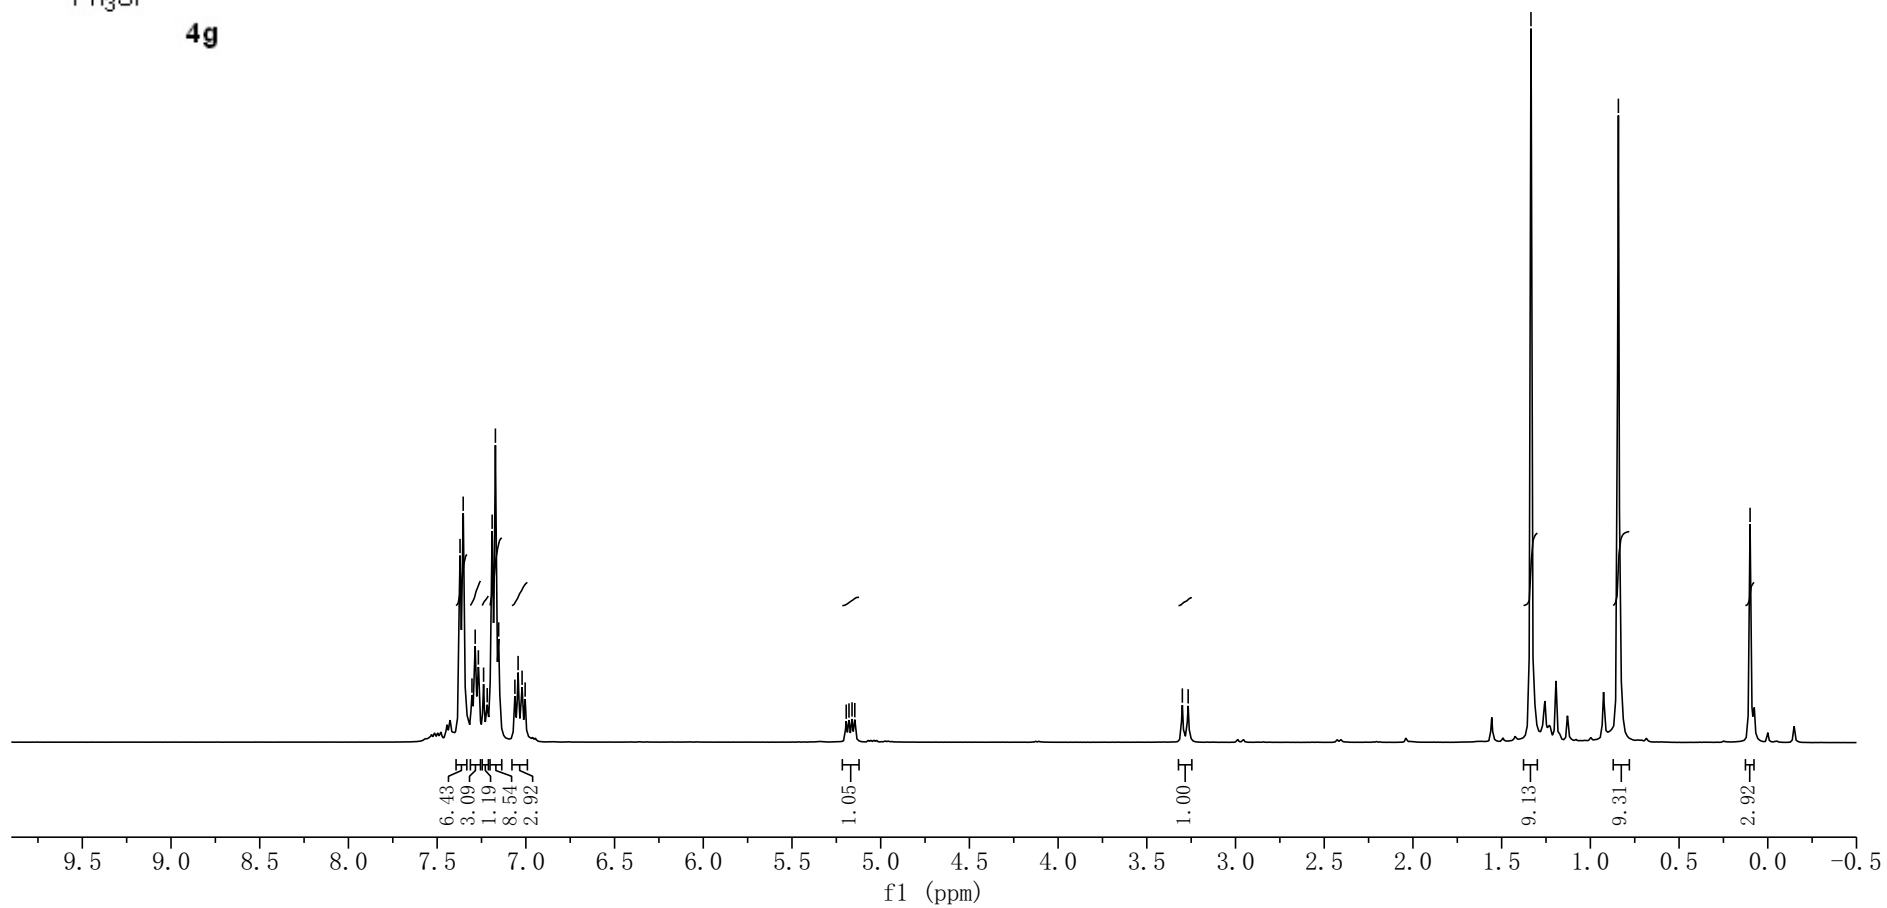

WY-7-45B-1 C13 CDCI3 150M Hz

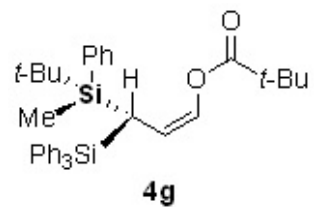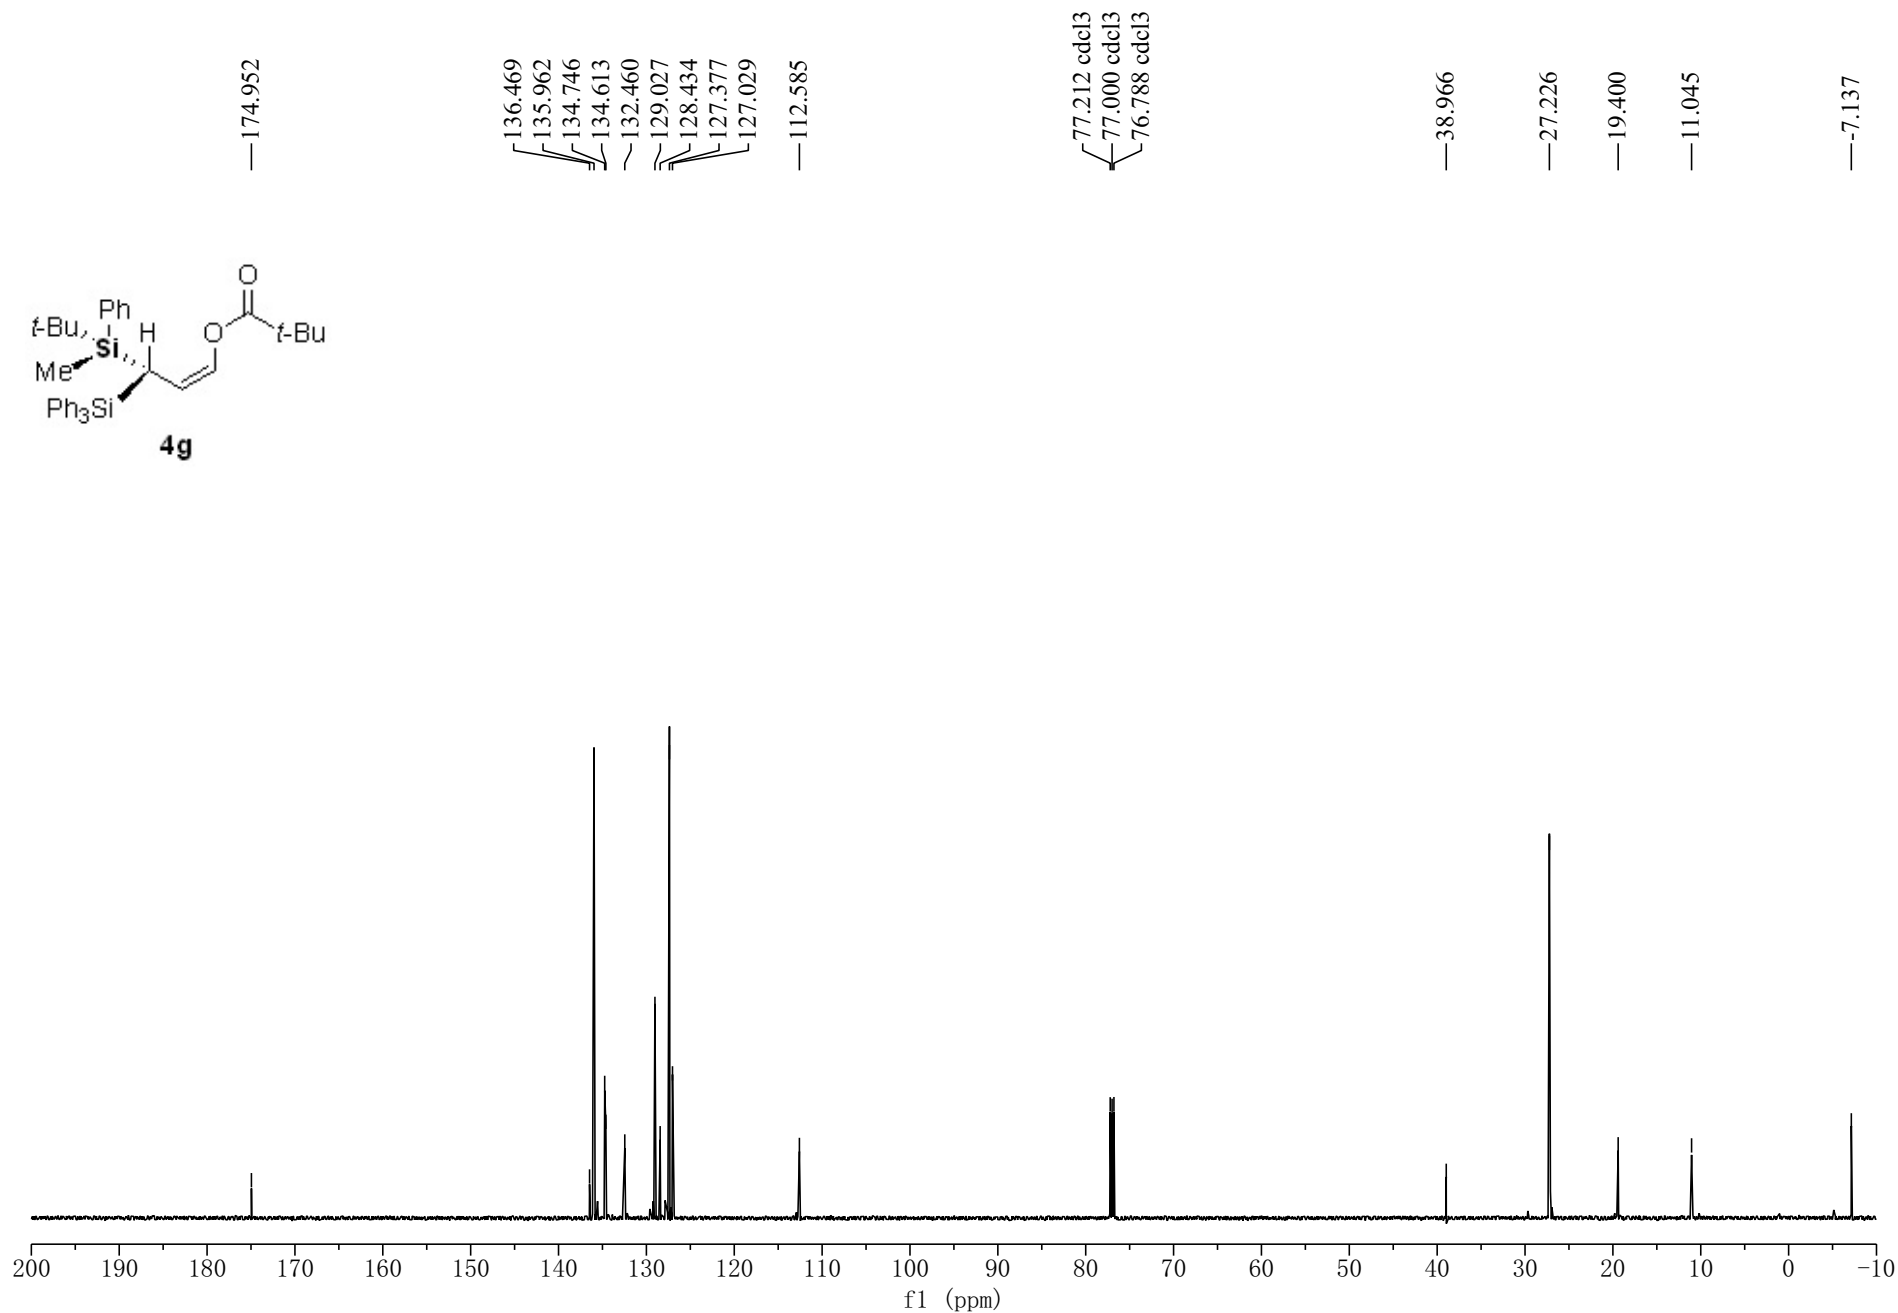

Gui-2-57B-2 H1 CDCl3 400M Hz

7.388  
7.370  
7.297  
7.279  
7.260  
7.211  
7.187  
7.167  
7.148  
7.065  
7.049  
7.038

6.058  
6.019

5.187  
5.172  
5.155  
5.139

3.331  
3.298

2.029  
2.012

0.828

0.094

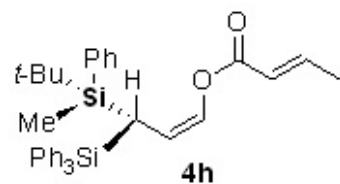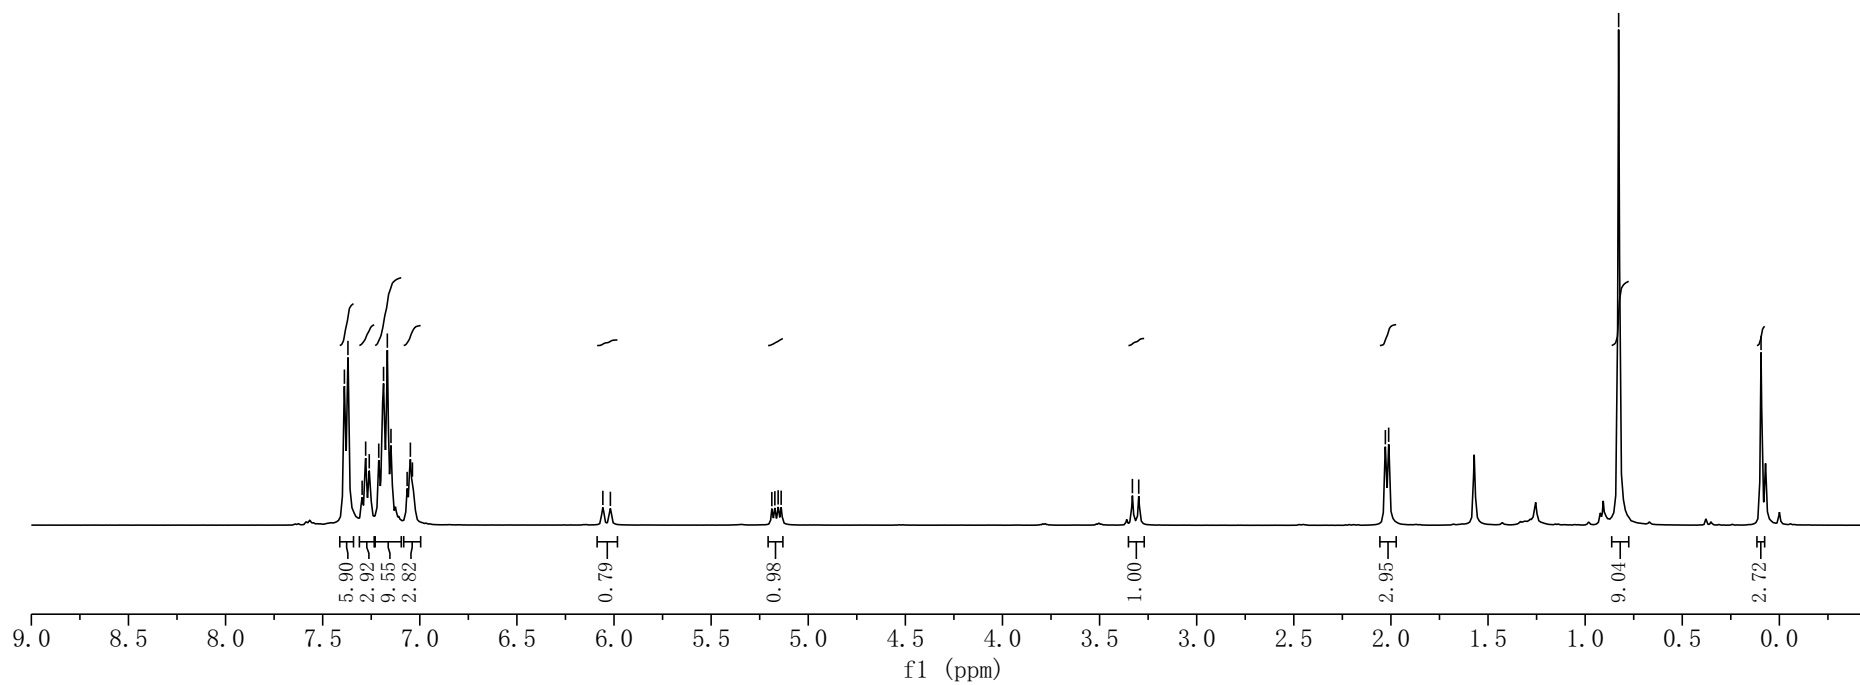

Gui-2-57B-2 C13 CDCl3 150M Hz

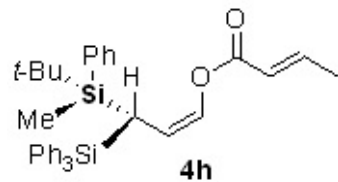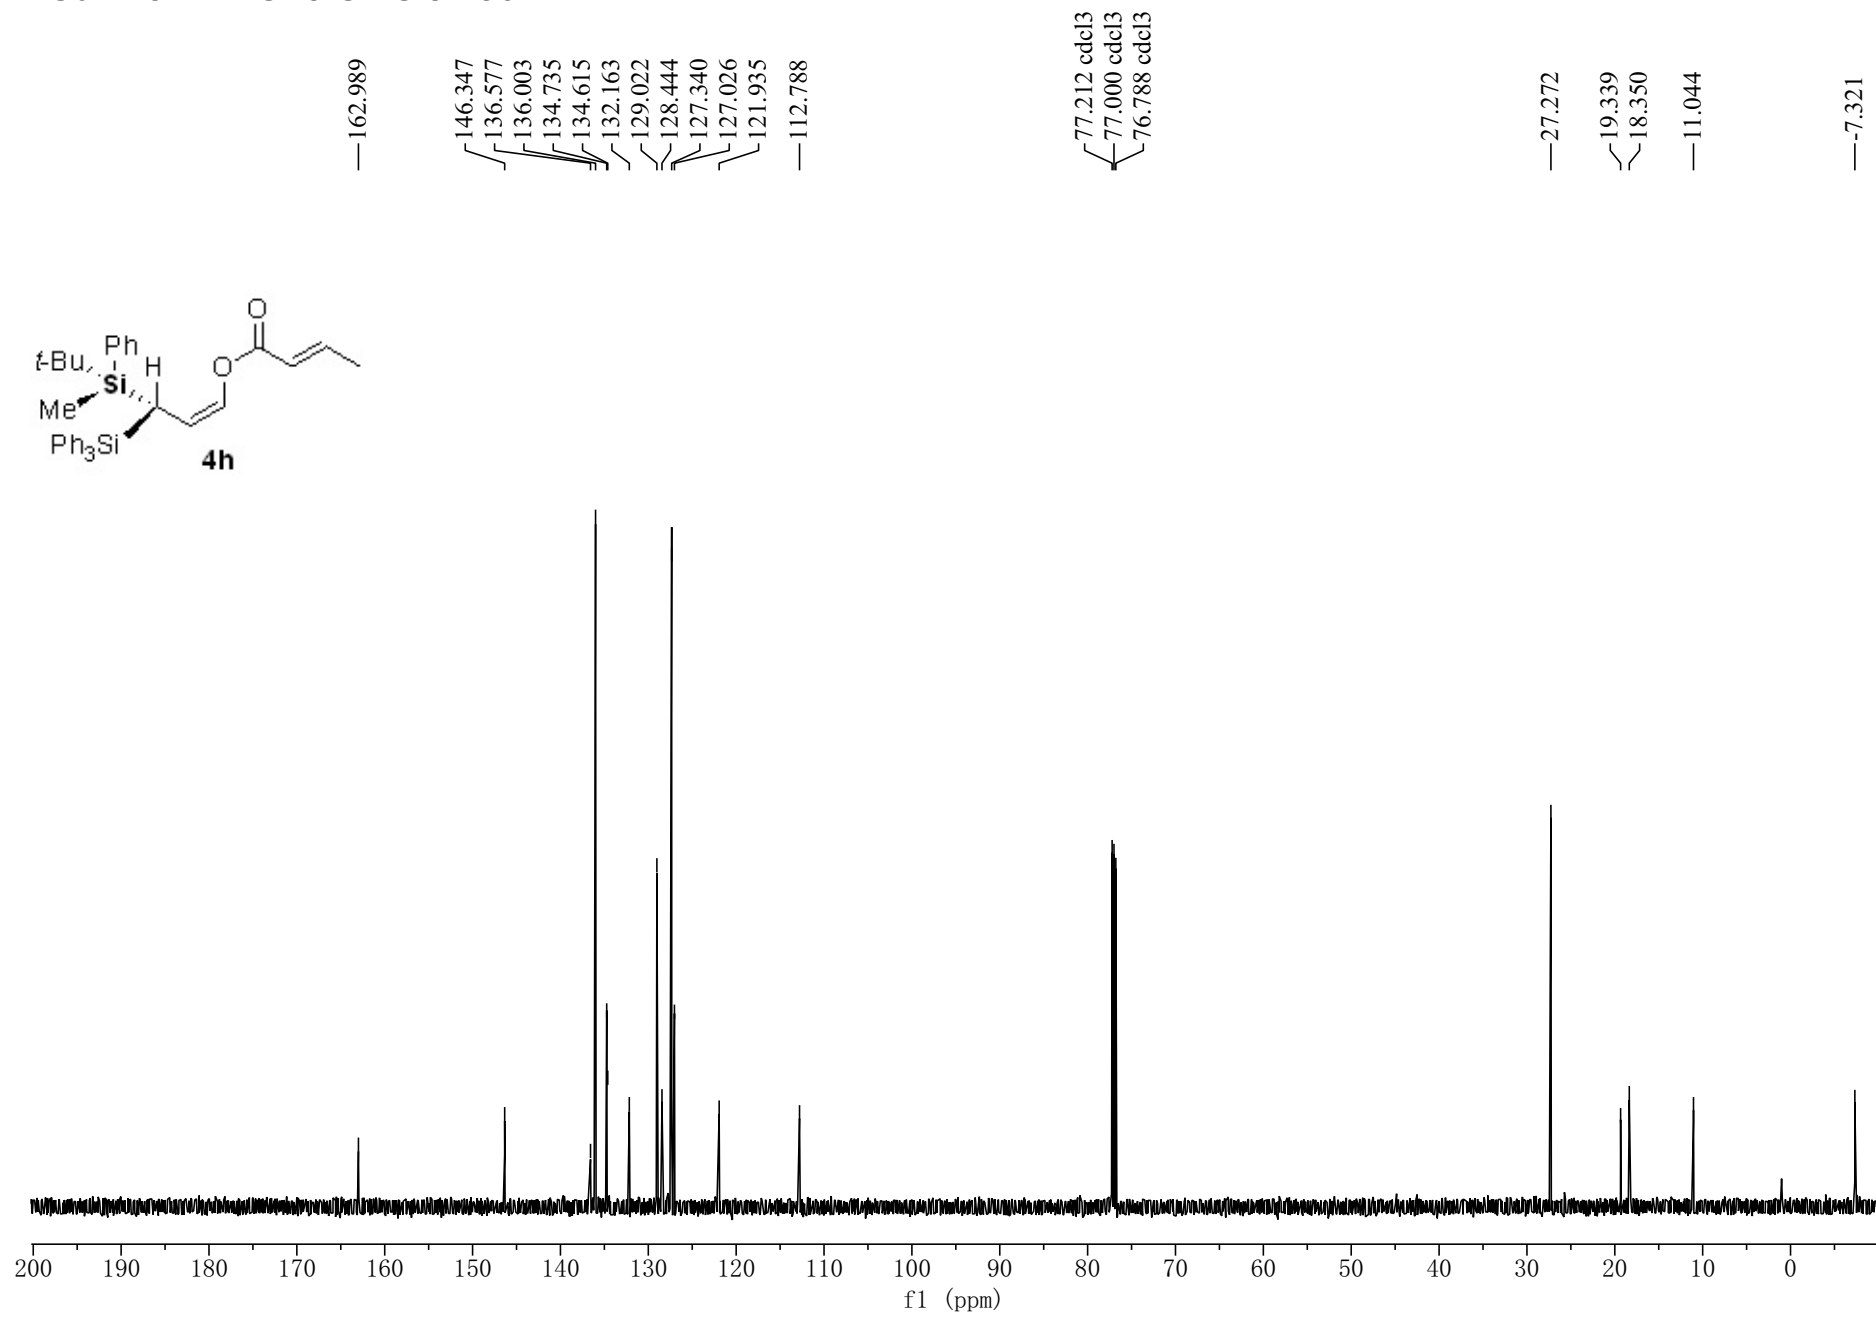

Gui-2-58B-3 H1 CDCl3 400M Hz

7.642  
7.633  
7.477  
7.467  
7.415  
7.397  
7.257  
7.227  
7.194  
7.176  
7.157  
7.128  
7.112  
7.081  
7.062  
6.886  
6.560

5.256  
5.240  
5.223  
5.208

3.390  
3.357

0.855

0.125

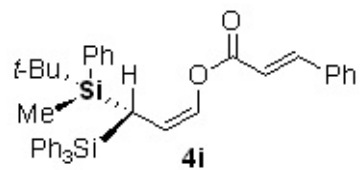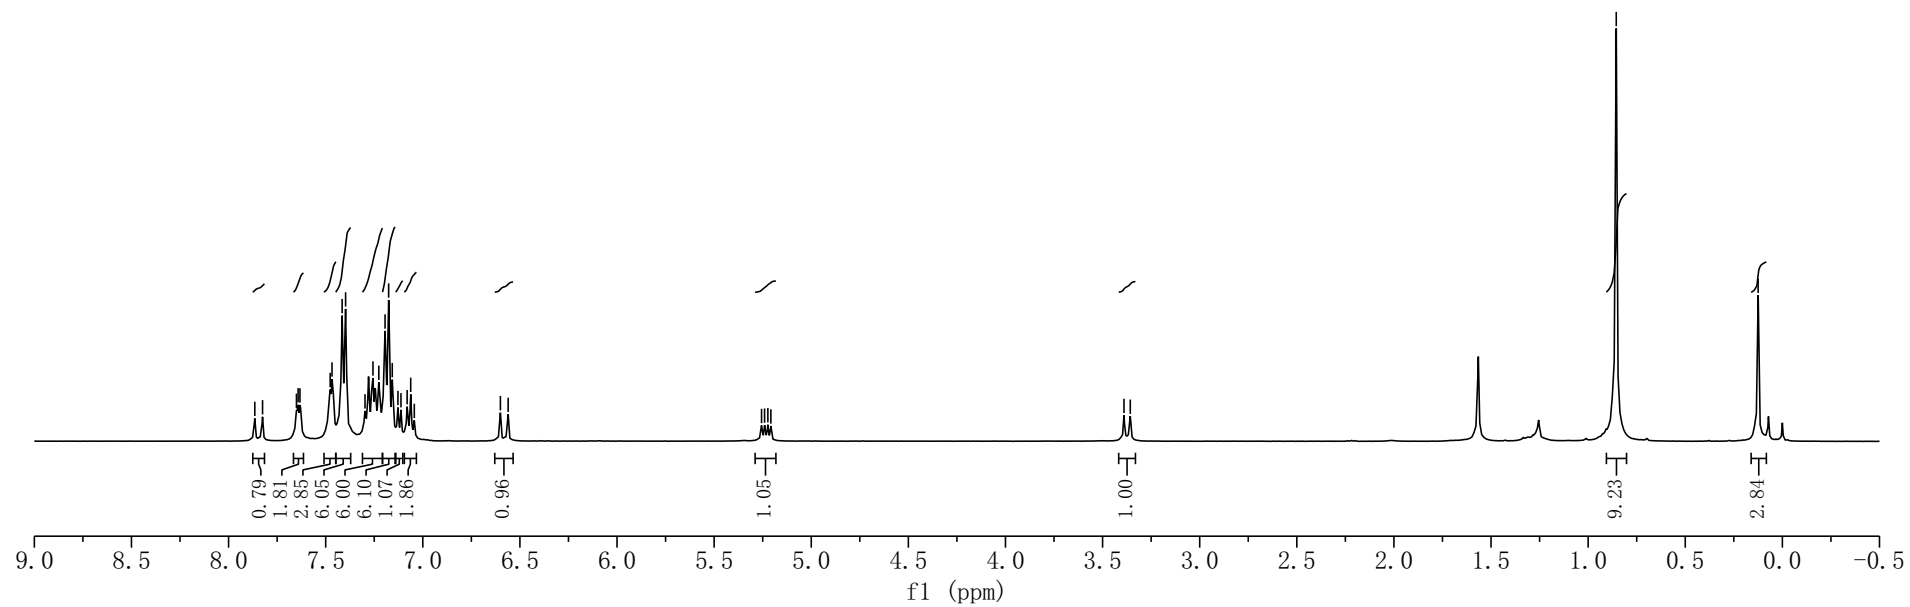

Gui-2-58B-3 C13 CDCl3 100M Hz

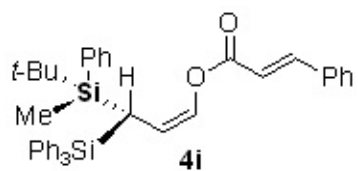

163.486  
146.149  
136.605  
136.028  
134.732  
134.573  
134.254  
132.316  
130.717  
129.068  
129.039  
128.483  
128.317  
127.368  
127.077  
117.056  
113.112

77.212 cdcl3  
77.000 cdcl3  
76.789 cdcl3

27.305  
19.375  
11.334  
-7.257

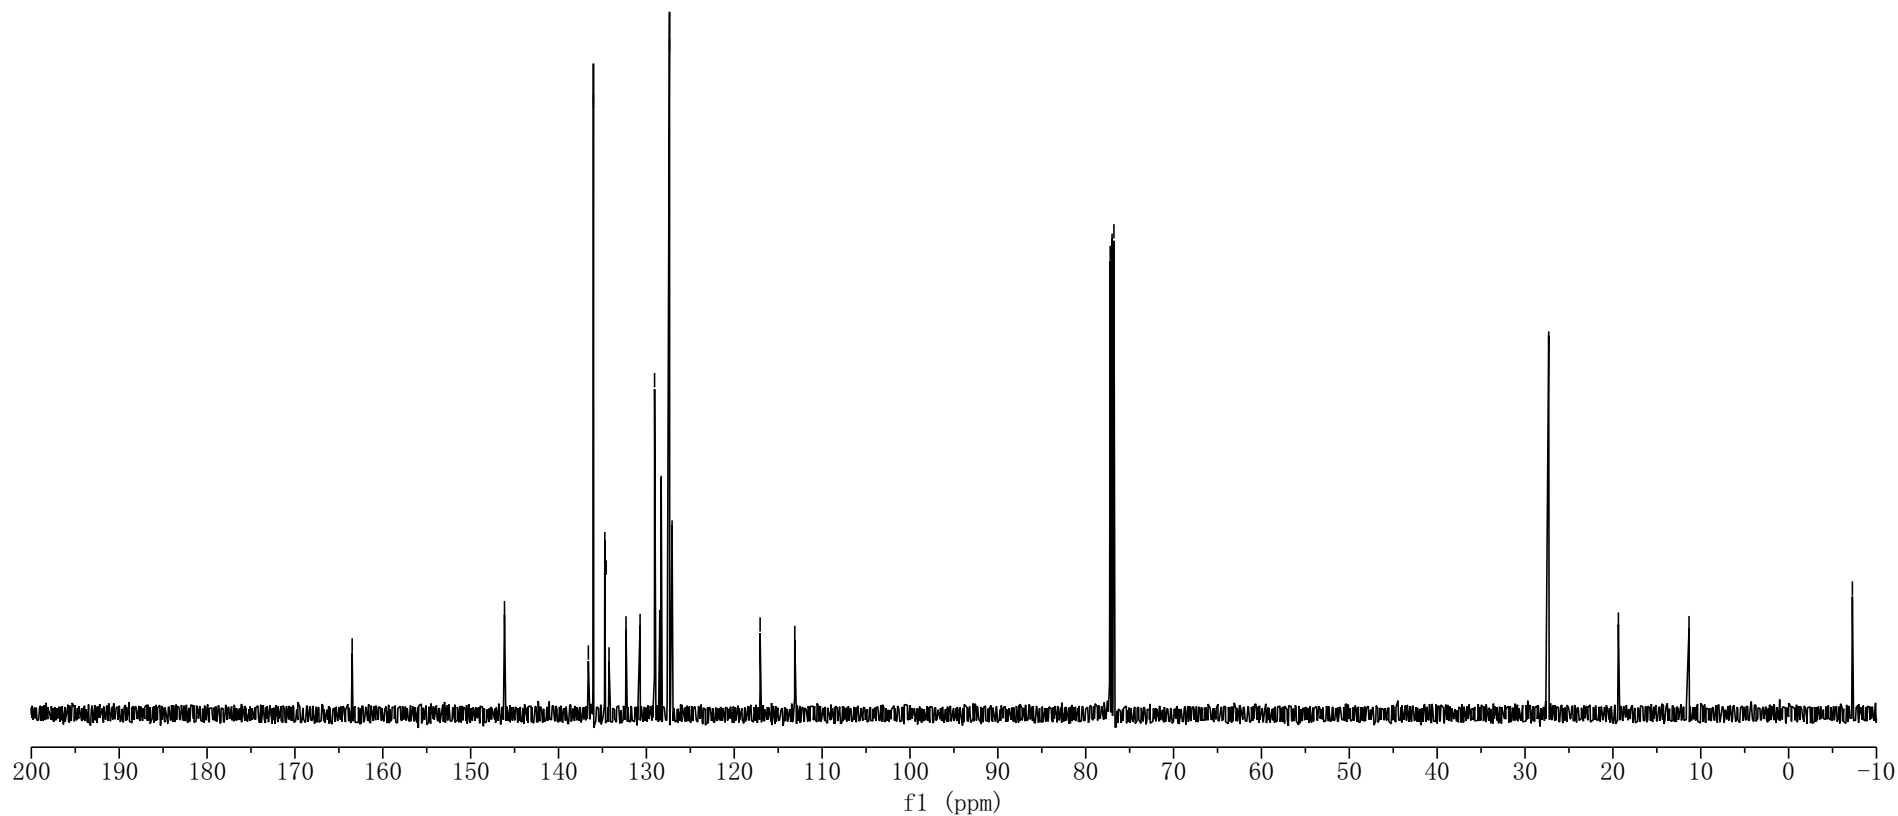

WY-7-58B H1 CDCl3 400M Hz

7.400  
7.382  
7.299  
7.281  
7.262  
7.251  
7.190  
7.172  
7.153  
7.044  
7.025  
7.007  
6.752  
6.736

5.164  
5.149  
5.131  
5.116

3.878

3.279  
3.246

0.833

0.078

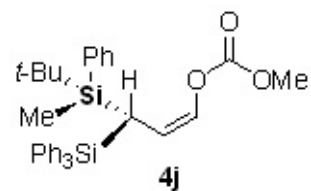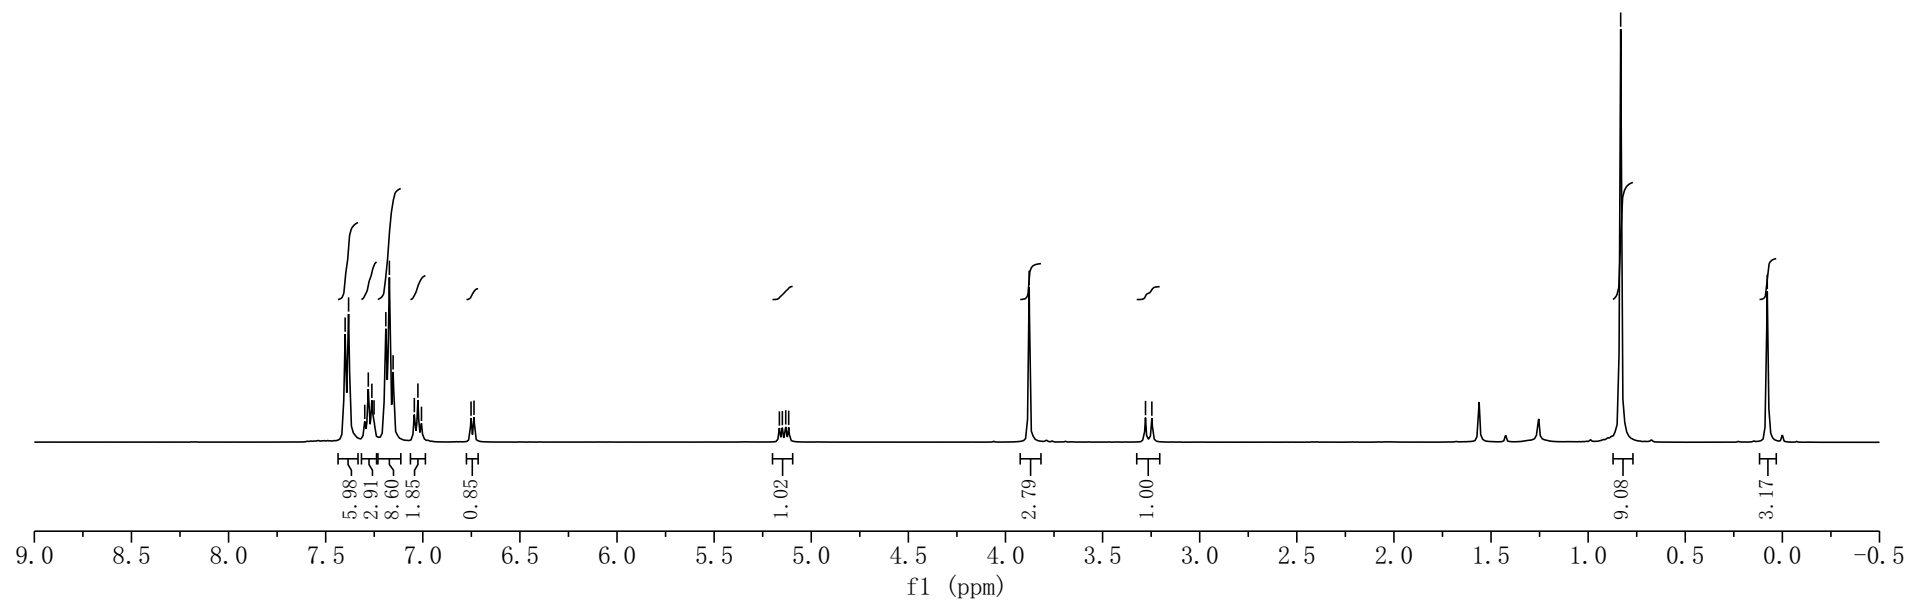

WY-7-58B C13 CDCI3 150M Hz

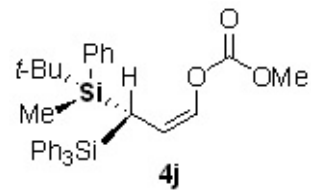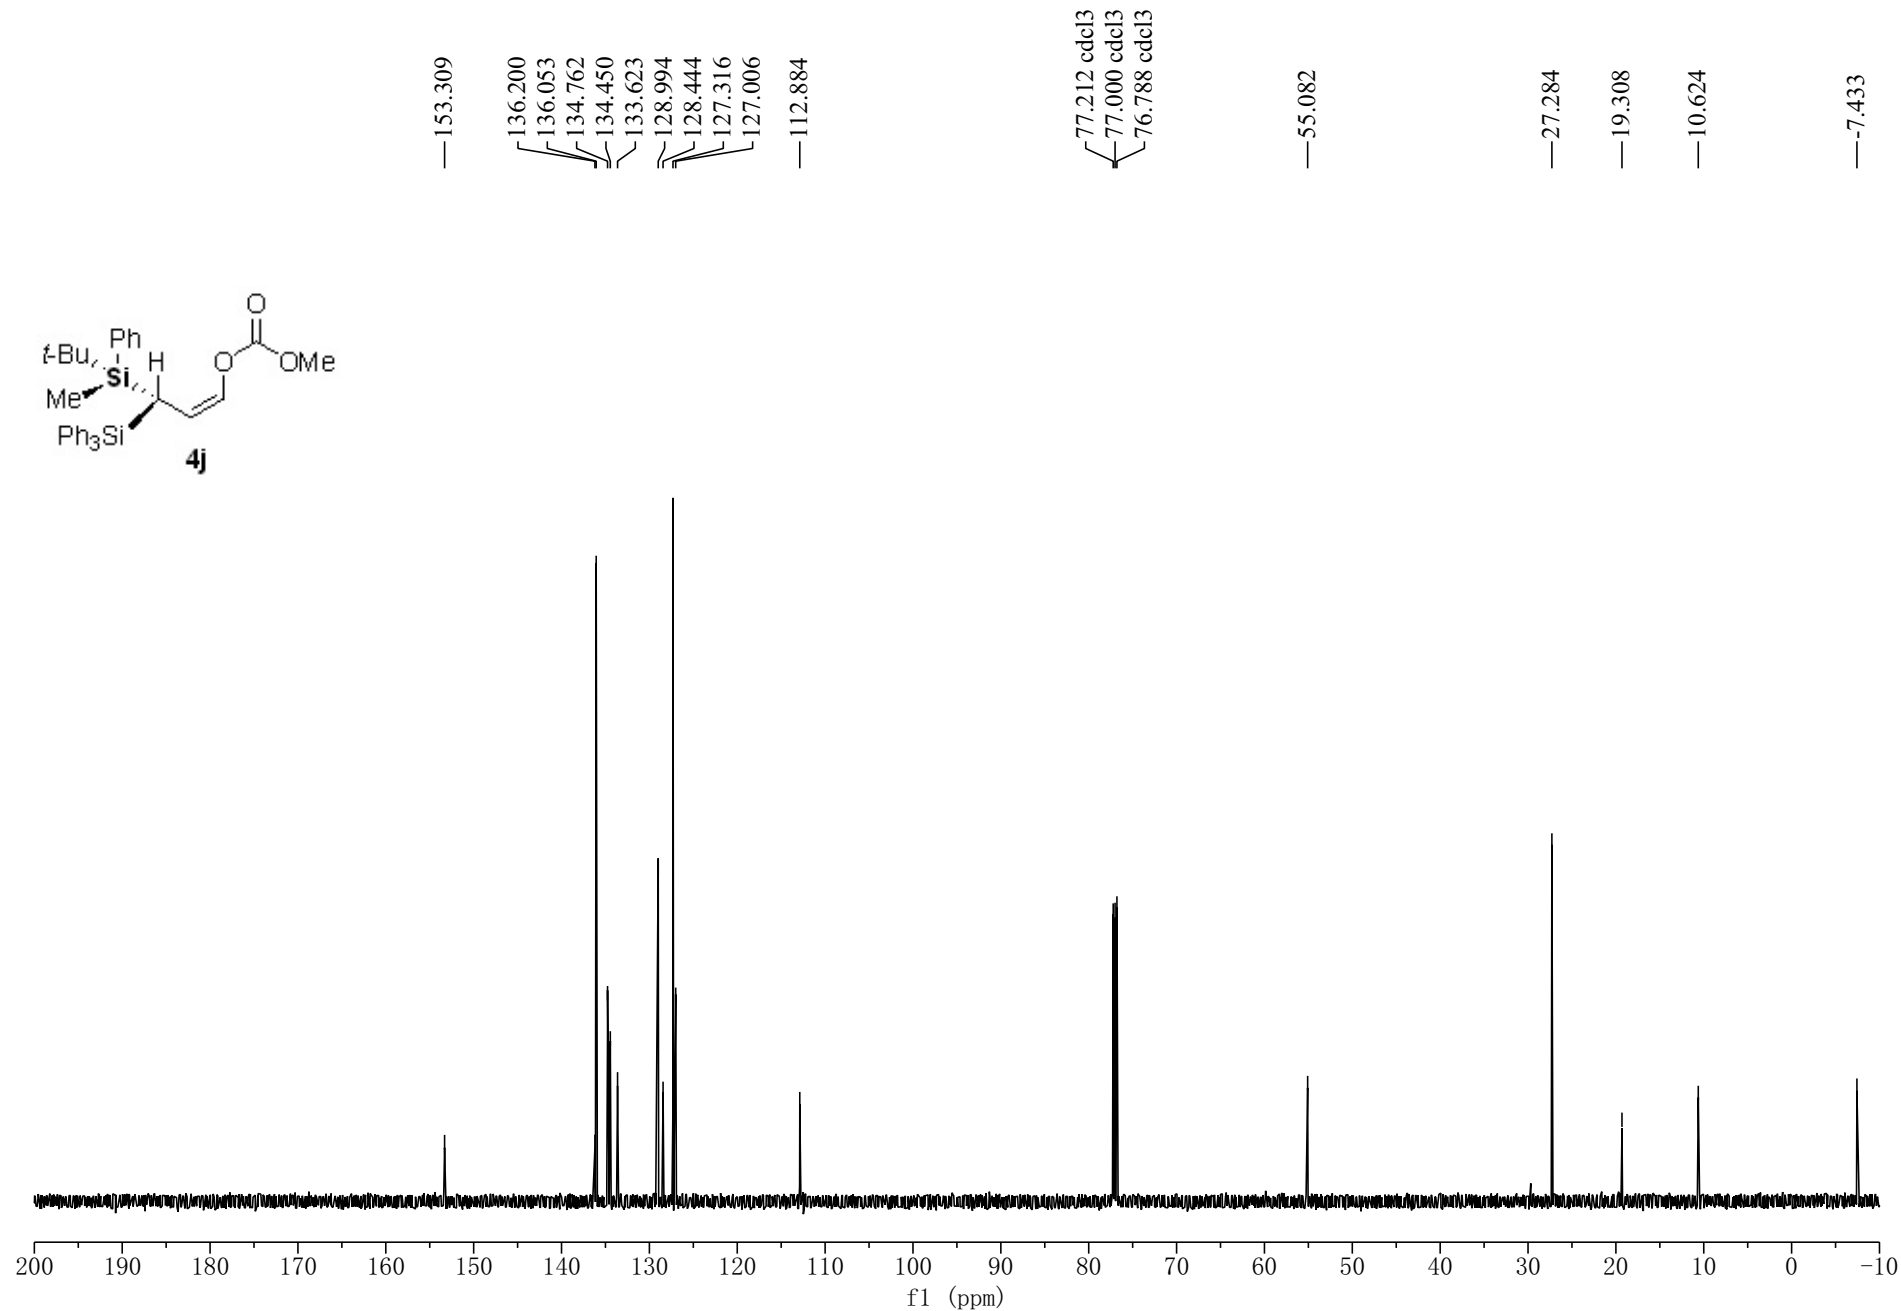



Gui-2-59-P-3 C13 CDCl3 150M Hz

7.458  
7.436  
7.413  
7.395  
7.289  
7.271  
7.245  
7.213  
7.195  
7.179  
7.163  
7.055  
7.036  
7.017  
6.837  
6.822

5.266  
5.251  
5.233  
5.218

3.276  
3.243

0.856

0.104

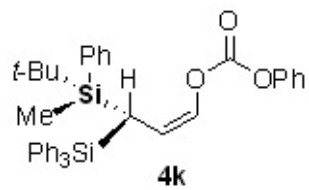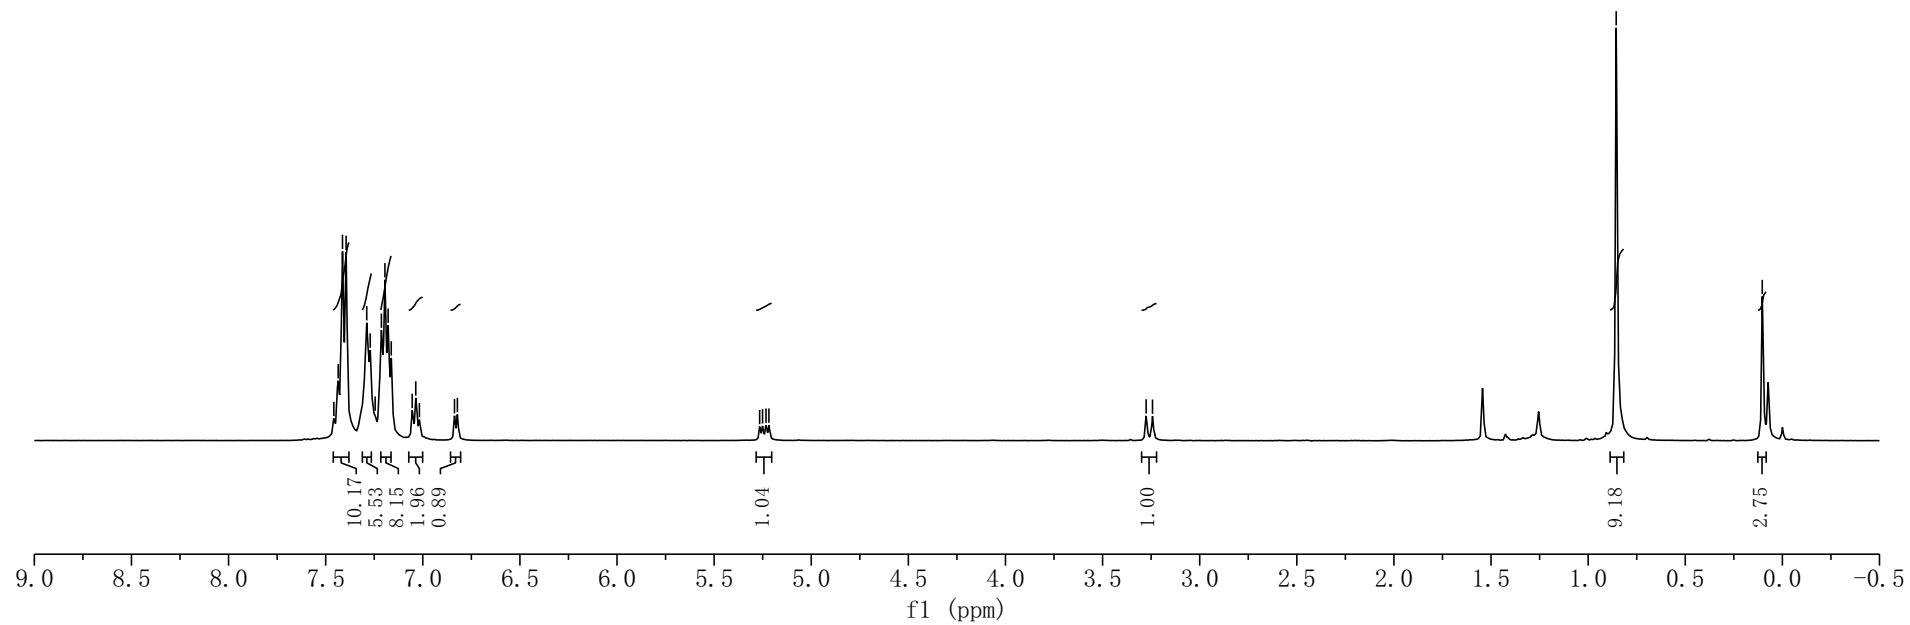

Gui-2-59-P-3 C13 CDCl3 150M Hz

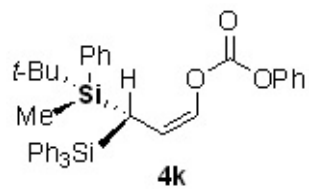

- 150.962
- 136.062
- 134.754
- 134.342
- 133.504
- 129.594
- 129.551
- 129.089
- 128.490
- 127.375
- 127.039
- 126.281
- 121.014
- 120.891
- 113.876

- 77.211 cdcl3
- 77.000 cdcl3
- 76.788 cdcl3

27.309

19.356

10.928

-7.364

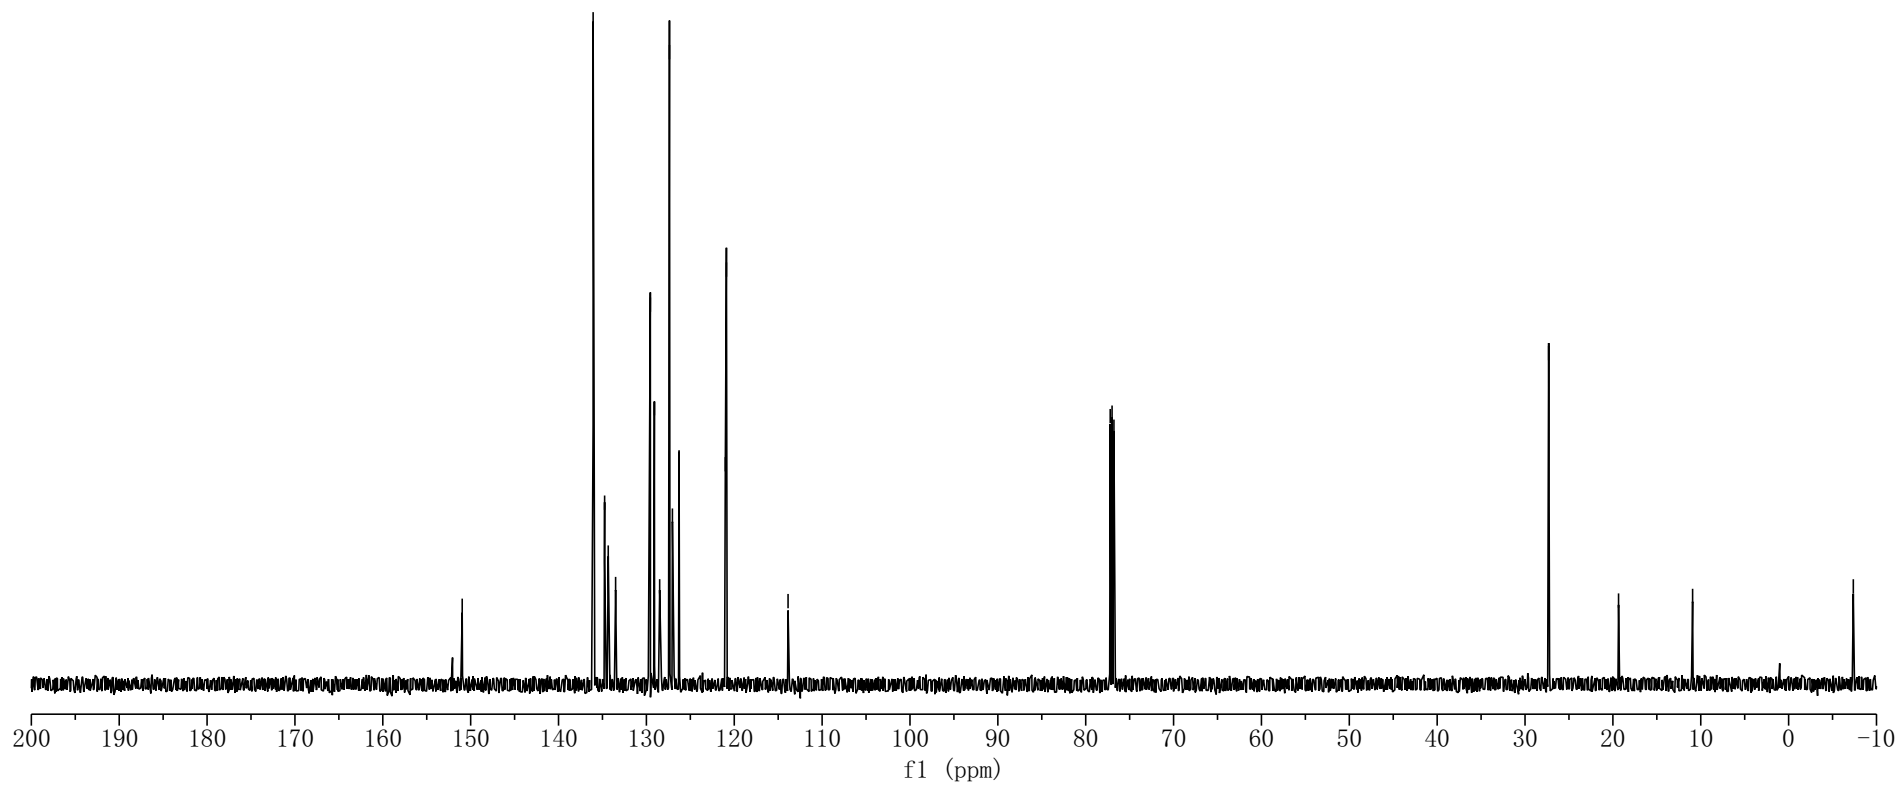

CH-0308 H1 CDCl3 400M Hz

7.400  
7.382  
7.298  
7.279  
7.222  
7.189  
7.171  
7.152  
7.043  
7.024  
7.006  
6.753  
6.738

5.164  
5.149  
5.132  
5.116

3.876

3.280  
3.247

0.833

0.078

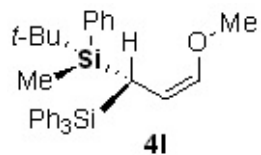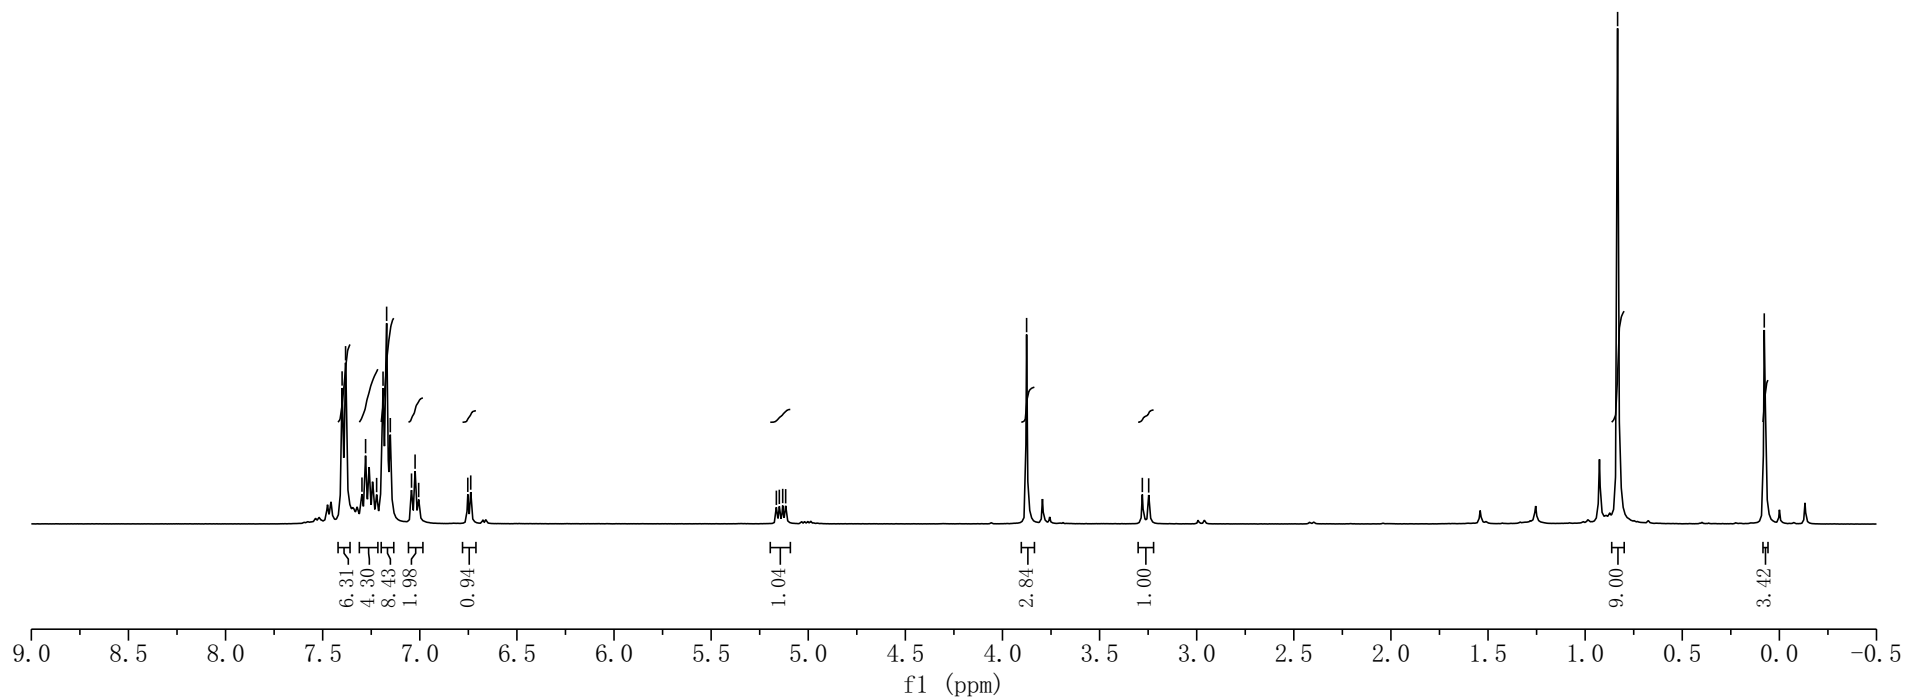

WY-7-93-3 C13 CDCI3 150M Hz

144.089  
136.958  
136.074  
135.420  
134.838  
128.712  
128.148  
127.162  
126.815

104.851

77.212 cdcl3  
77.000 cdcl3  
76.788 cdcl3

59.008

27.383

19.337

8.715

7.415

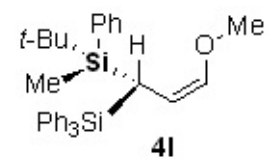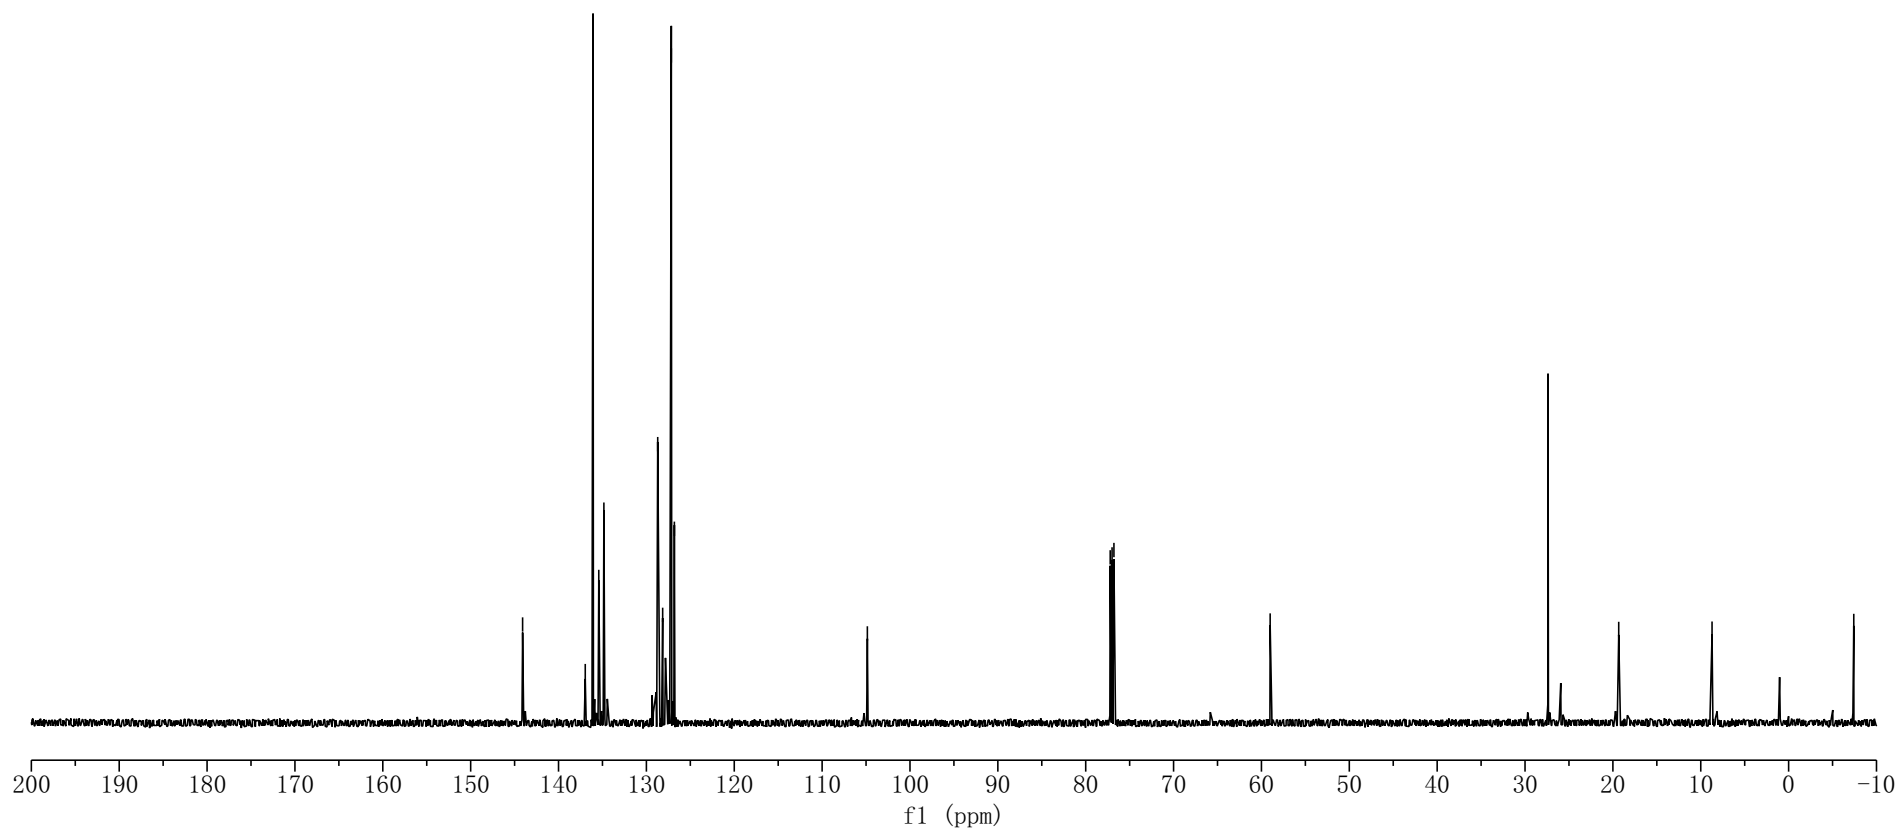

7.553  
7.549  
7.545  
7.543  
7.535  
7.530  
7.392  
7.389  
7.382  
7.379  
7.374  
7.373  
7.369  
7.367  
7.361  
7.357  
7.354  
7.353  
7.349  
7.345  
7.343  
7.339  
7.336  
7.332  
7.260

4.157  
4.148  
4.139  
4.129

— 1.545

~ 1.021  
~ 0.947

< 0.350  
< 0.341

— 0.012

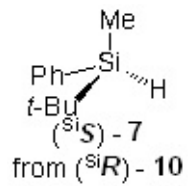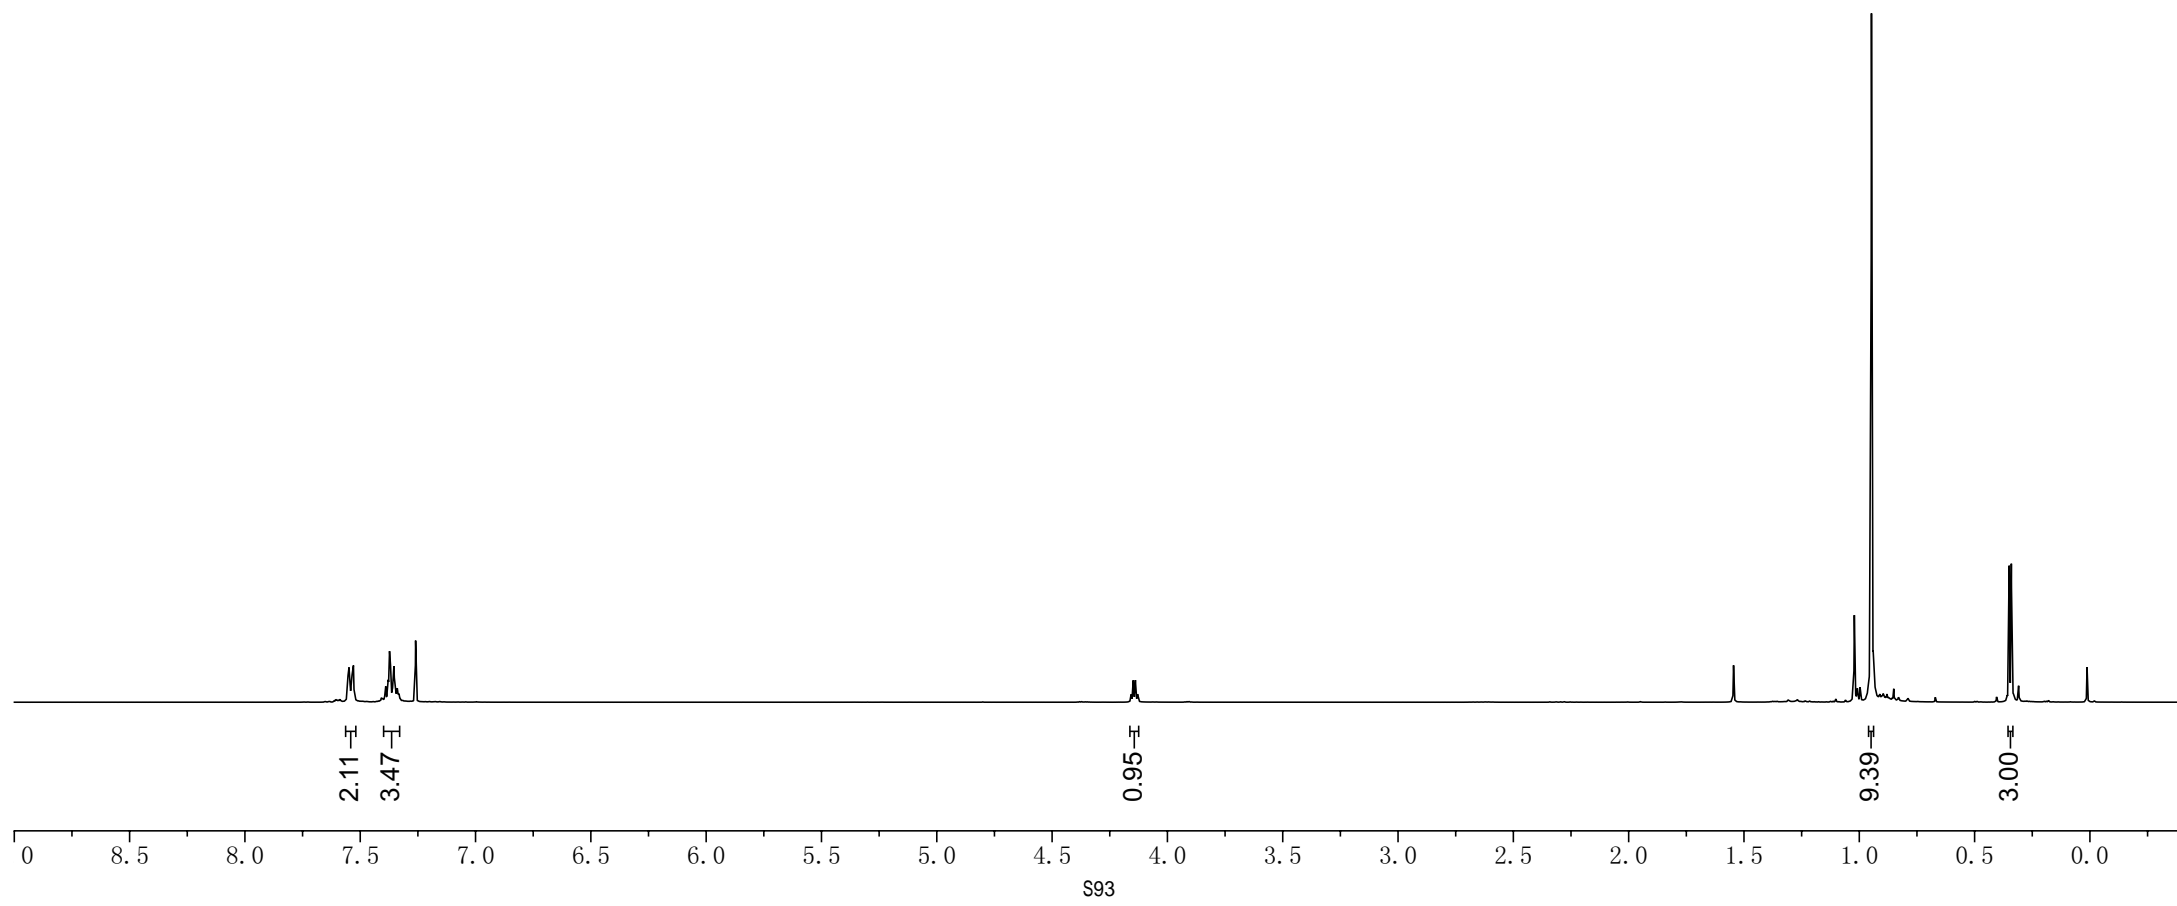

7.543  
7.539  
7.535  
7.525  
7.520  
7.383  
7.372  
7.366  
7.361  
7.347  
7.332  
7.260

4.145  
4.136  
4.126  
4.117

—1.564

—1.256

—0.936

<0.340  
<0.331

—0.002

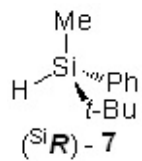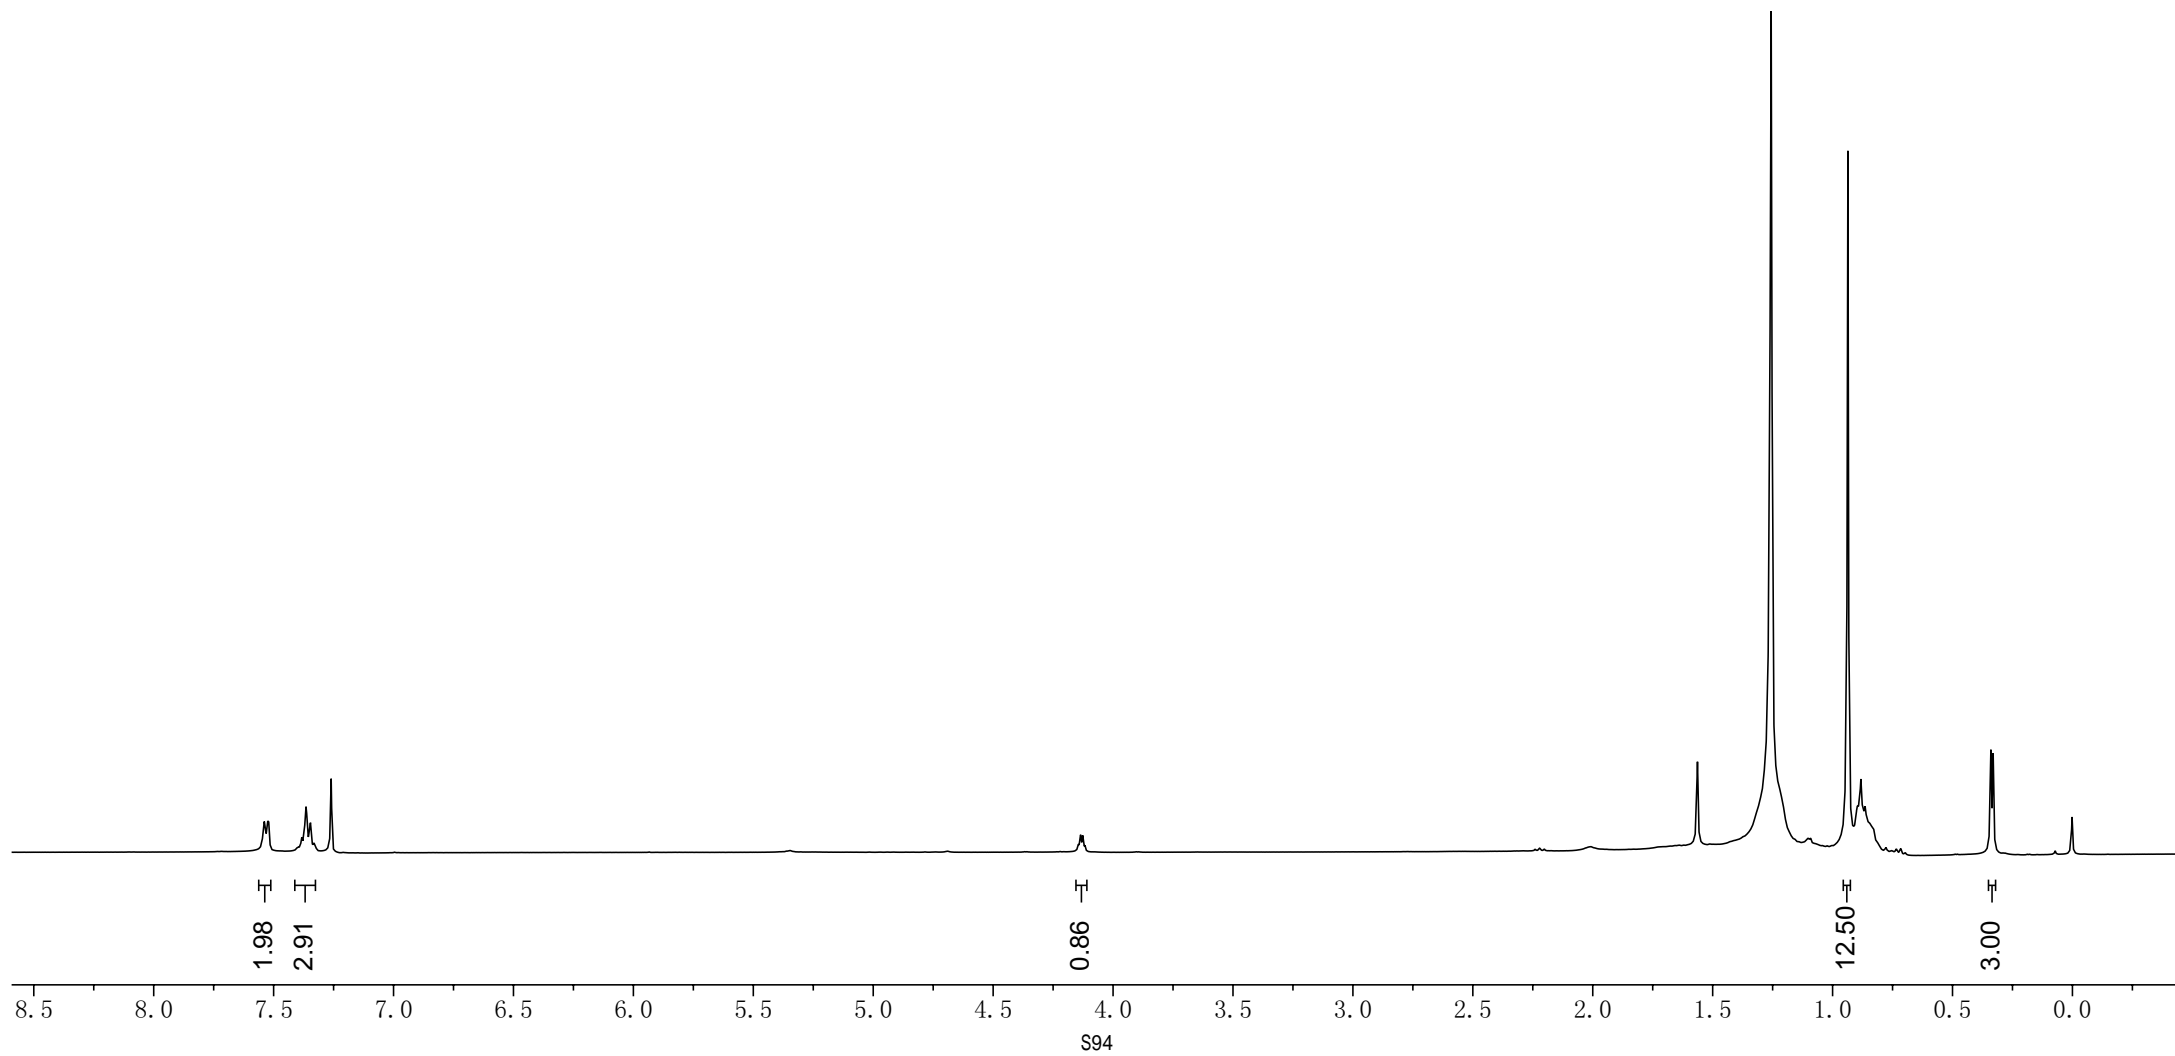

WY-7-80 H1 CDCl3 400M Hz

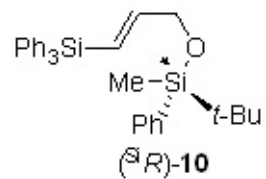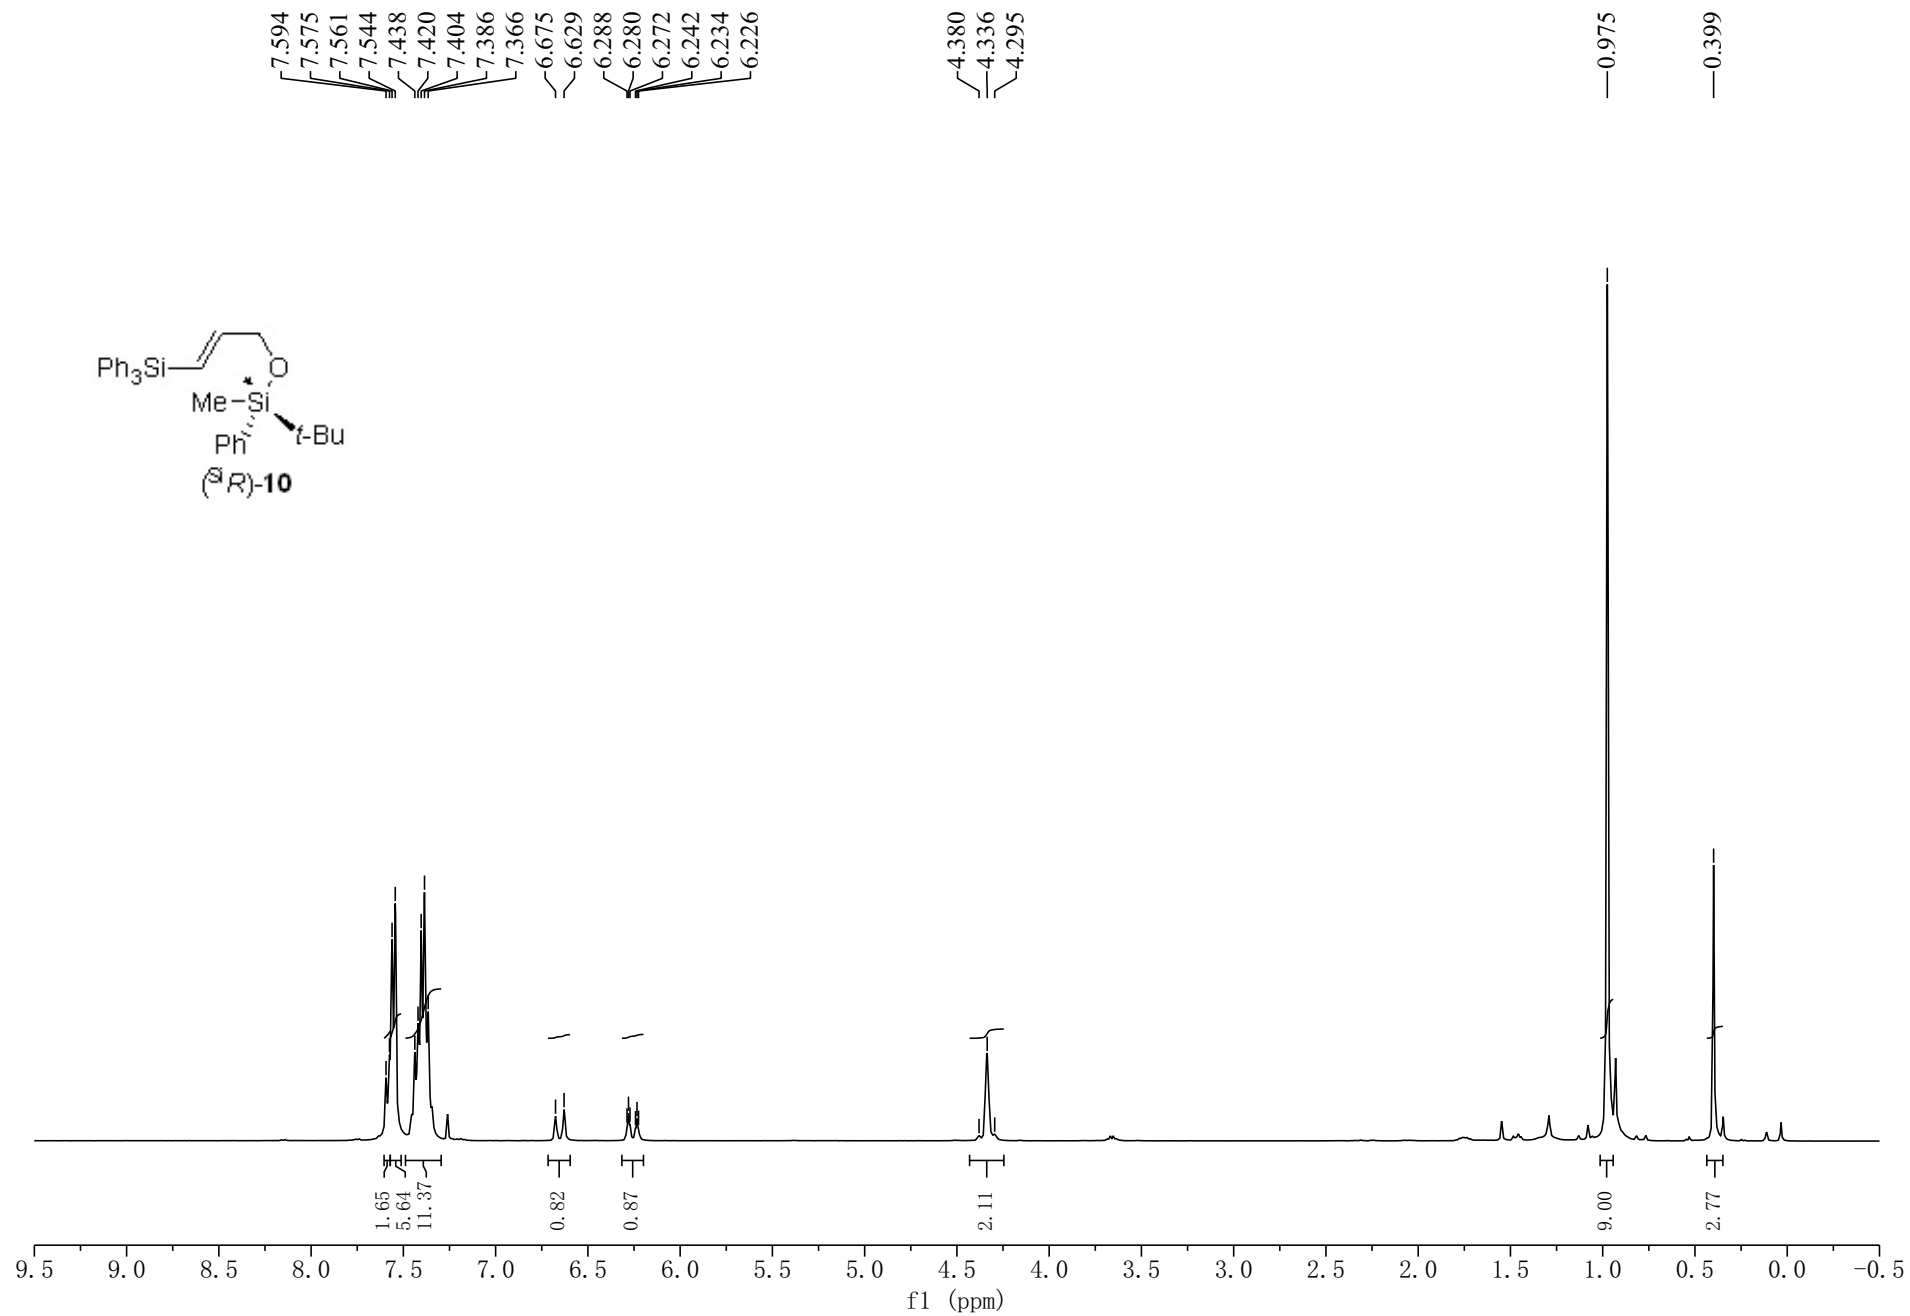

WY-7-80 C13 CDCI3 150M Hz

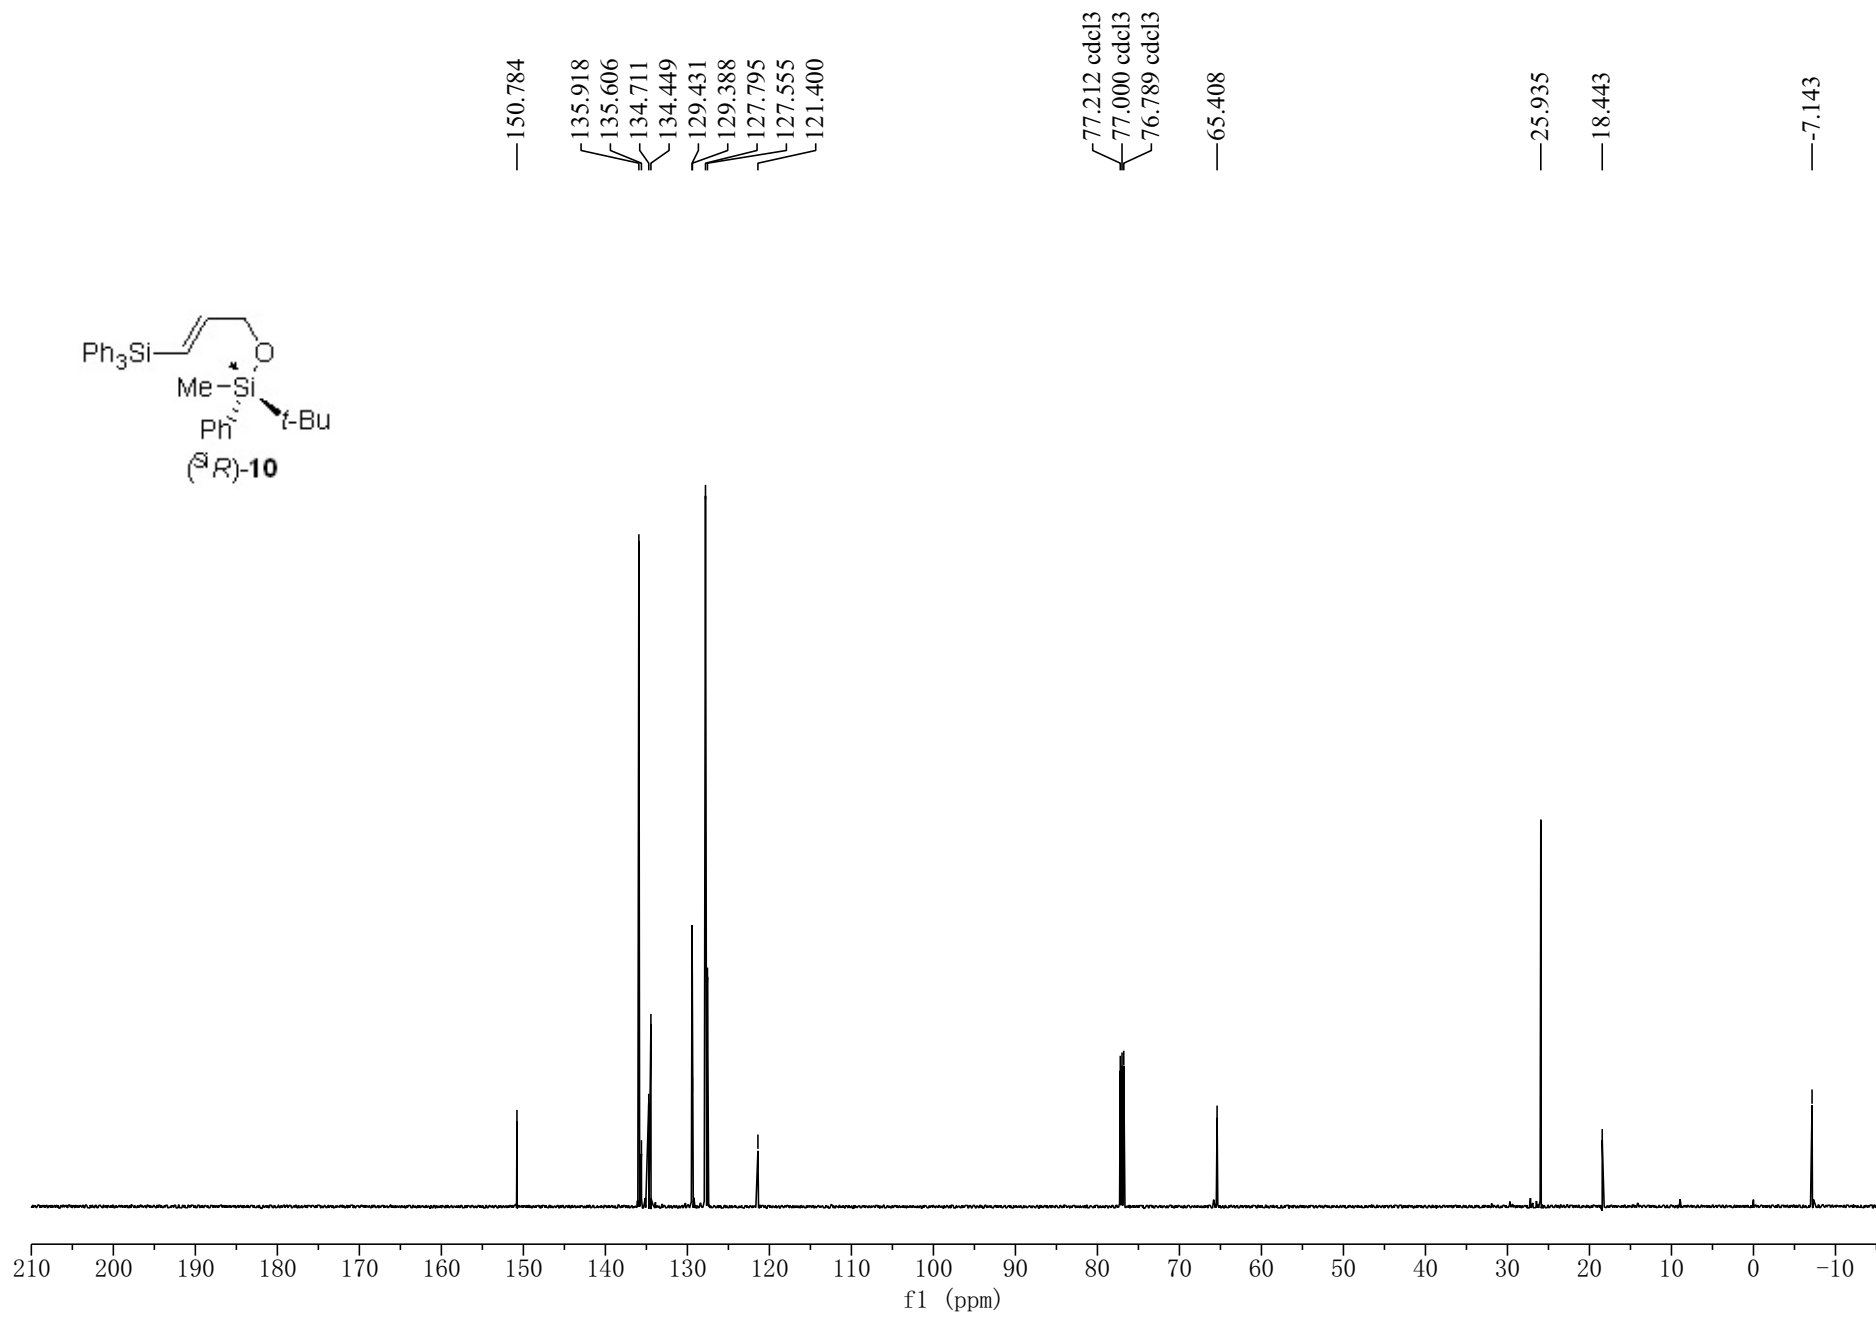



WY-8-12-1 H1 CDCl3 400M Hz

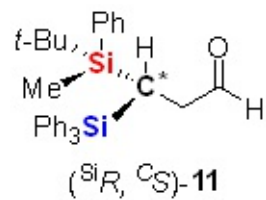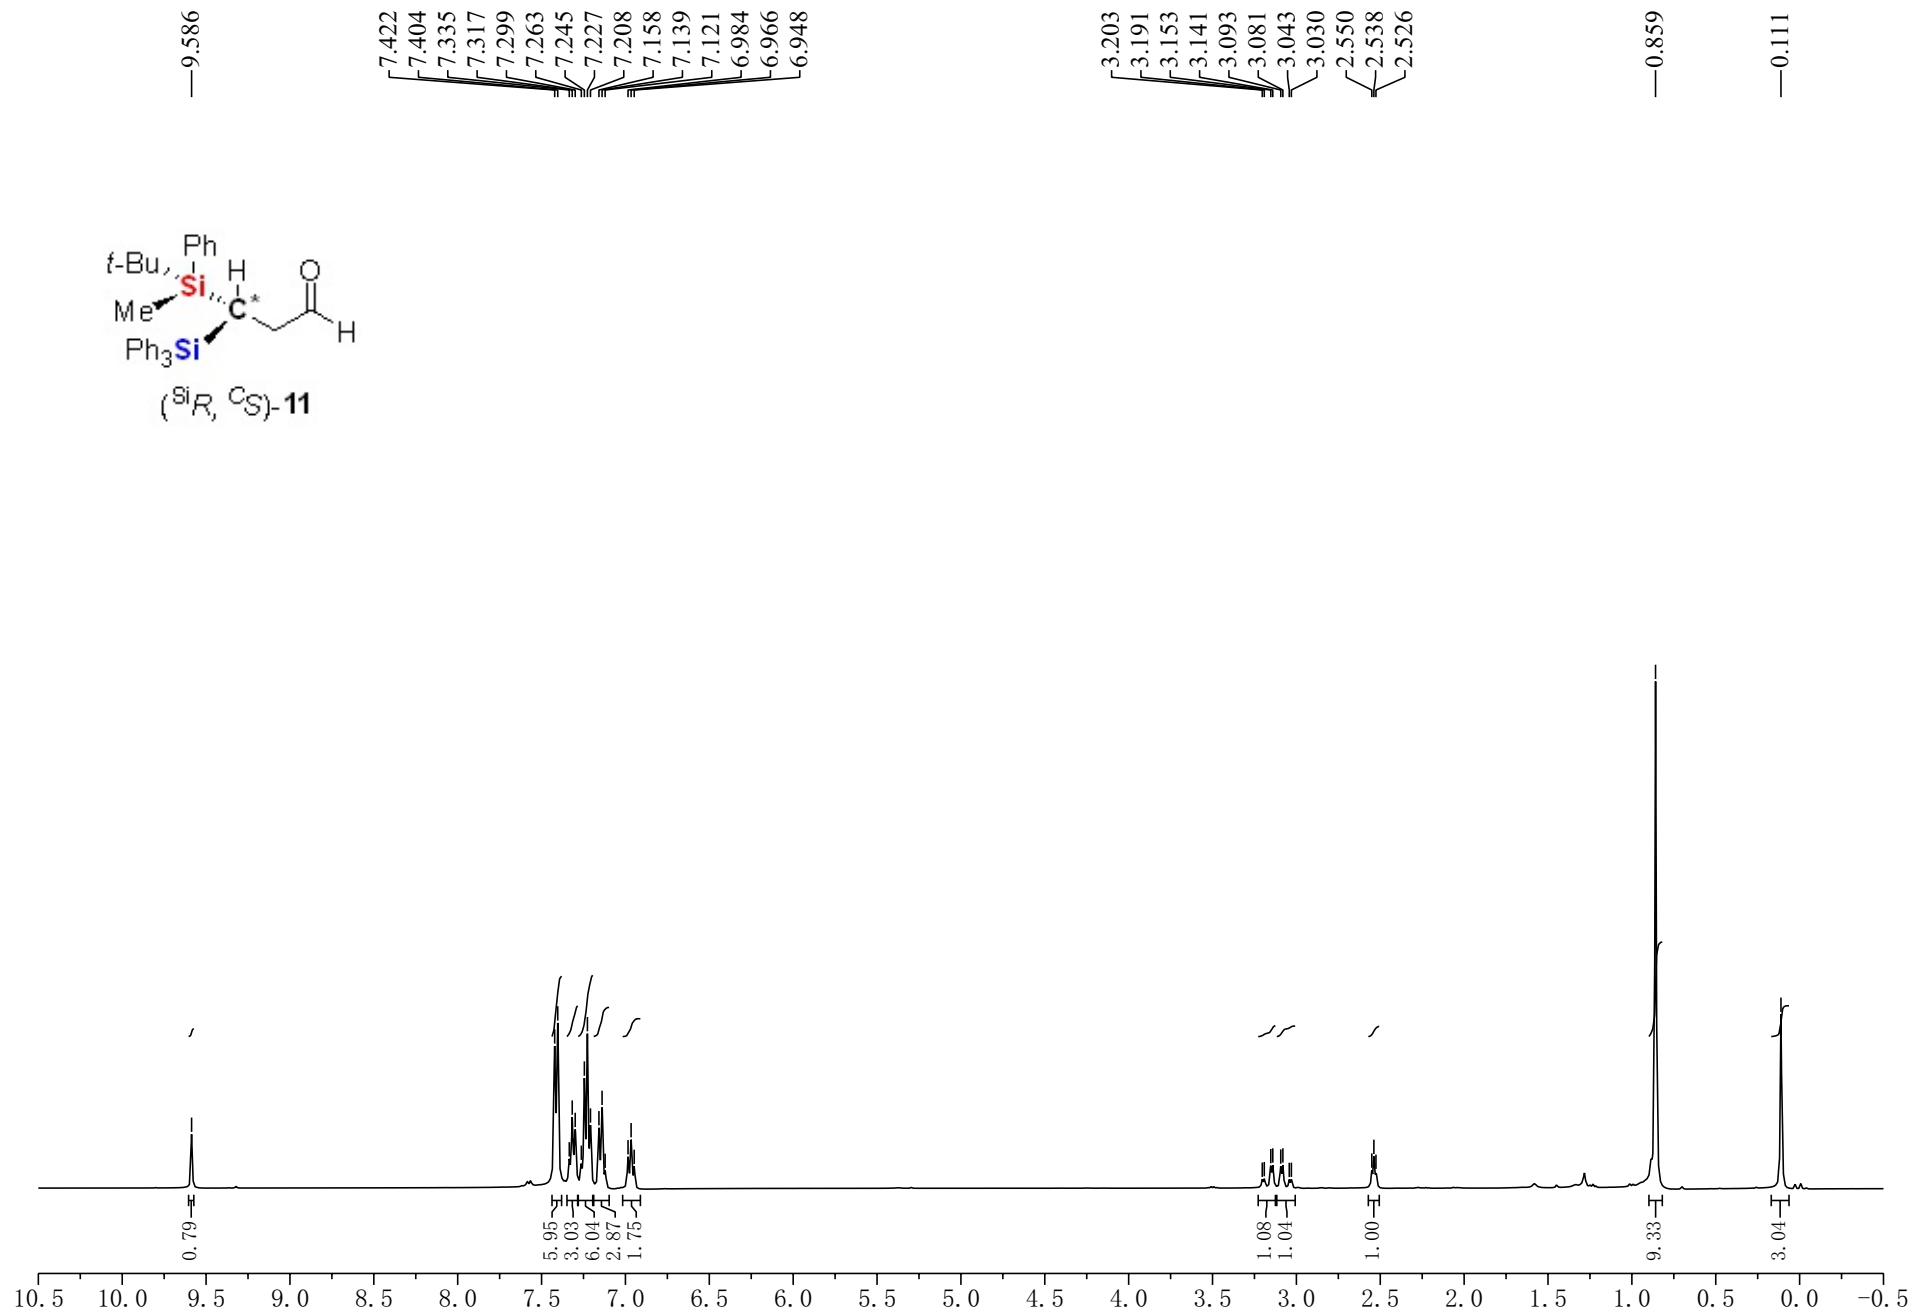

WY-8-12-1 C13 CDCI3 100M Hz

—200.806

135.946  
134.993  
134.638  
129.100  
128.374  
127.522  
126.828

77.211 cdcl3  
77.000 cdcl3  
76.788 cdcl3

—42.553

—27.704

—19.229

—2.057

—7.065

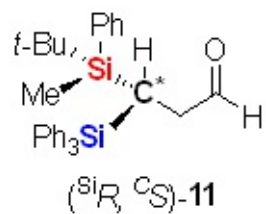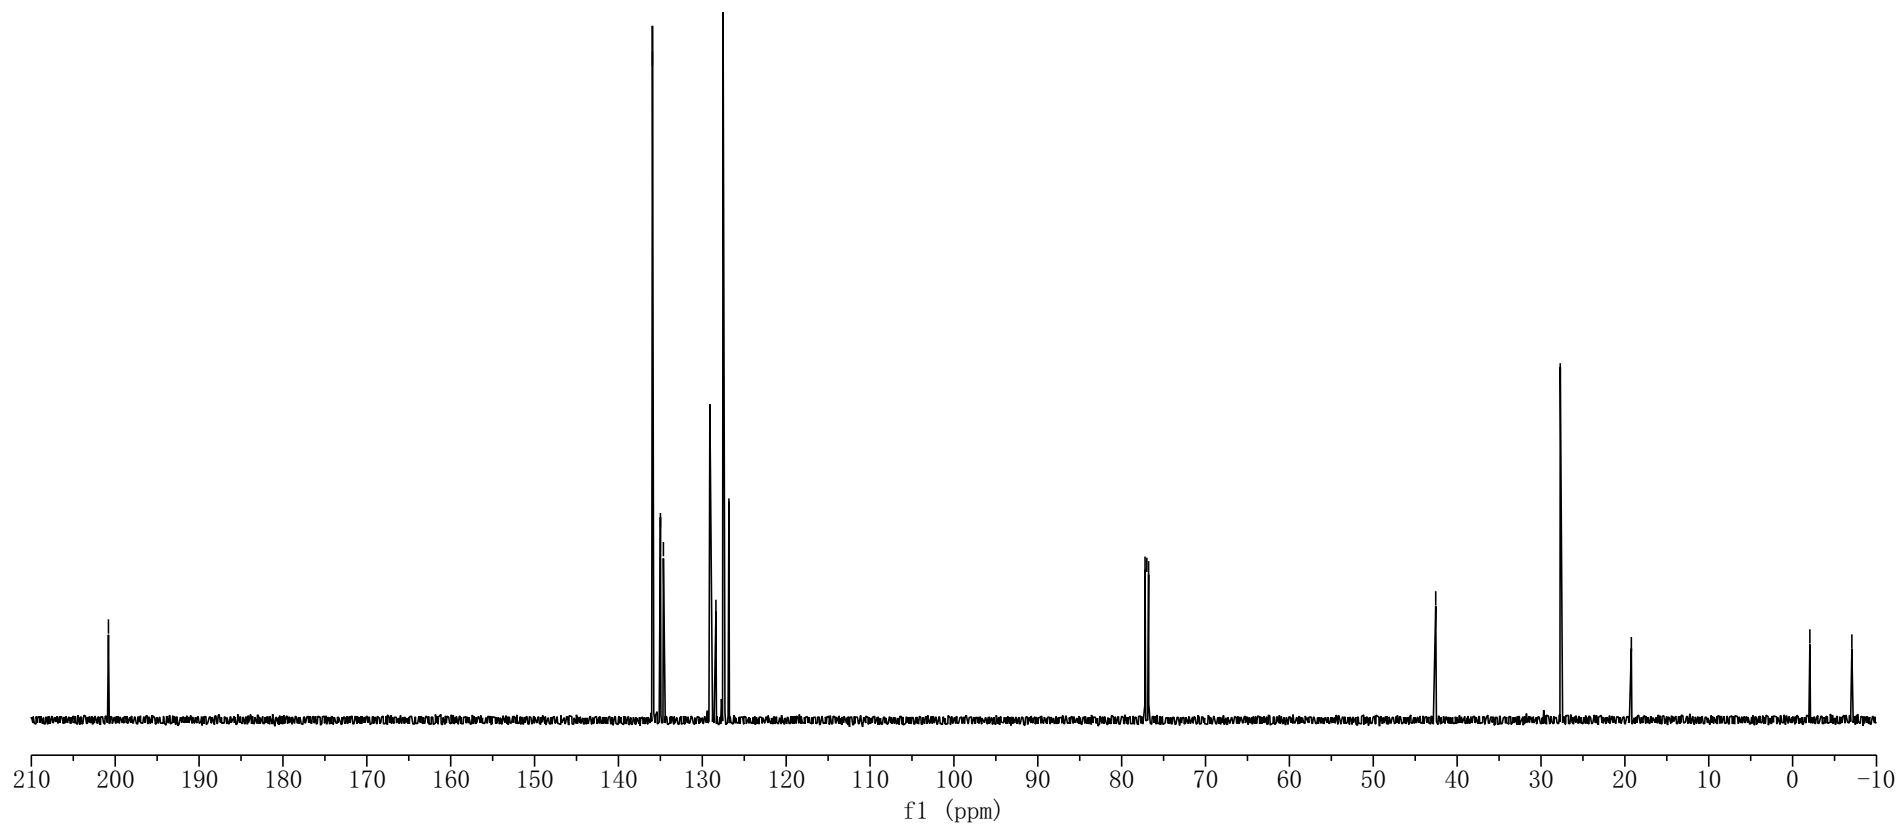

Supplement: c9ra05482k1.pdf [file c9ra05482k1.pdf]
